# Supplementary material for: SurLym trial: study protocol for a multicentre pragmatic randomised controlled trial on the added value of reconstructive lymphatic surgery to decongestive lymphatic therapy for the treatment of lymphoedema
Source: PubMed Central journal article supplement — BMJ Open. 2024 May 10;14(5):e078114. doi: 10.1136/bmjopen-2023-078114 (PMC11145716; doi:10.1136/bmjopen-2023-078114), 2024-05-10
Supplement: bmjopen-2023-078114.draft_revisions.pdf [file bmjopen-2023-078114.draft_revisions.pdf]

# BMJ Open

BMJ Open is committed to open peer review. As part of this commitment we make the peer review history of every article we publish publicly available.

When an article is published we post the peer reviewers' comments and the authors' responses online. We also post the versions of the paper that were used during peer review. These are the versions that the peer review comments apply to.

The versions of the paper that follow are the versions that were submitted during the peer review process. They are not the versions of record or the final published versions. They should not be cited or distributed as the published version of this manuscript.

BMJ Open is an open access journal and the full, final, typeset and author-corrected version of record of the manuscript is available on our site with no access controls, subscription charges or pay-per-view fees (<http://bmjopen.bmj.com>).

If you have any questions on BMJ Open's open peer review process please email [info.bmjopen@bmj.com](mailto:info.bmjopen@bmj.com)

# BMJ Open

## SurLym trial: Study protocol for a multicentre pragmatic randomised controlled trial on the added value of reconstructive lymphatic surgery to decongestive lymphatic therapy for the treatment of lymphoedema

|                               |                                                                                                                                                                                                                                                                                                                                                                                                                                                                                                                                                                                                                                                                                                                                                                                                                                                                                                                                                                                                                                                                                                                                                                                                                                                                                                                                                                                                                                                                                                                                                                                                                                                                                                                                                                                                              |
|-------------------------------|--------------------------------------------------------------------------------------------------------------------------------------------------------------------------------------------------------------------------------------------------------------------------------------------------------------------------------------------------------------------------------------------------------------------------------------------------------------------------------------------------------------------------------------------------------------------------------------------------------------------------------------------------------------------------------------------------------------------------------------------------------------------------------------------------------------------------------------------------------------------------------------------------------------------------------------------------------------------------------------------------------------------------------------------------------------------------------------------------------------------------------------------------------------------------------------------------------------------------------------------------------------------------------------------------------------------------------------------------------------------------------------------------------------------------------------------------------------------------------------------------------------------------------------------------------------------------------------------------------------------------------------------------------------------------------------------------------------------------------------------------------------------------------------------------------------|
| Journal:                      | <i>BMJ Open</i>                                                                                                                                                                                                                                                                                                                                                                                                                                                                                                                                                                                                                                                                                                                                                                                                                                                                                                                                                                                                                                                                                                                                                                                                                                                                                                                                                                                                                                                                                                                                                                                                                                                                                                                                                                                              |
| Manuscript ID                 | bmjopen-2023-078114                                                                                                                                                                                                                                                                                                                                                                                                                                                                                                                                                                                                                                                                                                                                                                                                                                                                                                                                                                                                                                                                                                                                                                                                                                                                                                                                                                                                                                                                                                                                                                                                                                                                                                                                                                                          |
| Article Type:                 | Protocol                                                                                                                                                                                                                                                                                                                                                                                                                                                                                                                                                                                                                                                                                                                                                                                                                                                                                                                                                                                                                                                                                                                                                                                                                                                                                                                                                                                                                                                                                                                                                                                                                                                                                                                                                                                                     |
| Date Submitted by the Author: | 24-Jul-2023                                                                                                                                                                                                                                                                                                                                                                                                                                                                                                                                                                                                                                                                                                                                                                                                                                                                                                                                                                                                                                                                                                                                                                                                                                                                                                                                                                                                                                                                                                                                                                                                                                                                                                                                                                                                  |
| Complete List of Authors:     | <p>Devoogdt, Nele; KU Leuven, Rehabilitation Sciences; KU Leuven University Hospitals Leuven, Center for lymphedema<br/> De Vrieze, Tessa; KU Leuven, Department of Rehabilitation Sciences<br/> Heroes, An-Kathleen; KU Leuven, Department of rehabilitation sciences; KU Leuven University Hospitals Leuven, Center for lymphedema<br/> Bechter-Hugl, Beate; KU Leuven University Hospitals Leuven, Vascular Surgery<br/> Fieuids, Steffen; Katholieke Universiteit Leuven, Biostats<br/> Godderis, Lode; KU Leuven, Centre for Environment and Health of KU Leuven<br/> Segers, Katarina; KU Leuven University Hospitals Leuven, Department of plastic and reconstructive surgery<br/> Maleux, Geert; KU Leuven University Hospitals Leuven, Department of radiology<br/> Deltombe, Thierry; CHU UCL Namur, Centre de Reference du Lymphoedème,<br/> Fripiat, Jacqueline; CHU UCL Namur, Centre de Reference du Lymphoedème,<br/> Servaes, Maxime; CHU UCL Namur<br/> Berners, Aline; CHU UCL Namur<br/> Fosseprez, Philippe; CHU UCL Namur<br/> Krug, Bruno; CHU UCL Namur<br/> Kayser, Françoise; CHU UCL Namur<br/> Falticeanu, Ana; CHU UCL Namur<br/> Randon, Caren; UZ Gent, Department of Thoracic and Vascular Surgery<br/> Monten, Chris; UZ Gent, Department of Radiotherapy<br/> Van Landuyt, Koen; UZ Gent<br/> De Pypere, Bernard; UZ Gent, Department of plastic and reconstructive surgery<br/> Degraeve, Liesl; UZ Gent, Department of plastic and reconstructive surgery<br/> Decorte, Tina; UZ Gent, Department of Physical Medicine and Rehabilitation<br/> De Schryver, Mieke; UZ Gent<br/> Van Besien, Vickie; UZ Gent<br/> Devos, Daniel; UZ Gent<br/> Suominen, Sinikka; Helsinki University Central Hospital<br/> Ayala, Jaume Masia; Universitat Internacional de Catalunya,</p> |

1  
2  
3  
4  
5  
6  
7  
8  
9  
10  
11  
12  
13  
14  
15  
16  
17  
18  
19  
20  
21  
22  
23  
24  
25  
26  
27  
28  
29  
30  
31  
32  
33  
34  
35  
36  
37  
38  
39  
40  
41  
42  
43  
44  
45  
46  
47  
48  
49  
50  
51  
52  
53  
54  
55  
56  
57  
58  
59  
60

|           |                                                                                                                                                                                                                                       |
|-----------|---------------------------------------------------------------------------------------------------------------------------------------------------------------------------------------------------------------------------------------|
|           | Pons, Gemma; Hospital de la Santa Creu i Sant Pau, Department of plastic surgery<br>Fourneau, Inge; KU Leuven University Hospitals Leuven, Vascular Surgery<br>thomis, sarah; KU Leuven University Hospitals Leuven, Vascular Surgery |
| Keywords: | Vascular medicine < INTERNAL MEDICINE, Plastic & reconstructive surgery < SURGERY, VASCULAR SURGERY                                                                                                                                   |
|           |                                                                                                                                                                                                                                       |

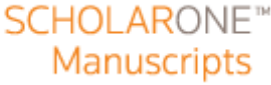

1  
2  
3 SurLym trial: Study protocol for a multicentre pragmatic randomised controlled trial on the added  
4 value of reconstructive lymphatic surgery to decongestive lymphatic therapy for the treatment of  
5 lymphoedema  
6  
7  
8  
9

10  
11 Nele Devoogdt<sup>1,2</sup>, Tessa De Vrieze<sup>2</sup>, An-Kathleen Heroes<sup>1,2</sup>, Beate Bechter-Hugl<sup>1</sup>, Steffen Fieuws<sup>3</sup>,  
12 Lode Godderis<sup>4</sup>, Katarina Segers<sup>5</sup>, Geert Maleux<sup>6</sup>, Thierry Deltombe<sup>7</sup>, Jacqueline Frippiat<sup>7</sup>, Maxime  
13 Servaes<sup>8</sup>, Aline Berners<sup>8</sup>, Philippe Fosseprez<sup>8</sup>, Bruno Krug<sup>9</sup>, Francoise Kayser<sup>9</sup>, Ana Falticeanu<sup>10</sup>, Caren  
14 Randon<sup>11</sup>, Chris Monten<sup>12</sup>, Koen Van Landuyt<sup>13</sup>, Bernard De Pypere<sup>13</sup>, Liesl Degraeve<sup>13</sup>, Tina Decorte<sup>14</sup>,  
15 Mieke De Schryver<sup>14</sup>, Vickie Van Besien<sup>14</sup>, Daniel Devos<sup>15</sup>, Sinikka Suominen<sup>16</sup>, Jaume Masia<sup>17</sup>,  
16 Gemma Pons<sup>17</sup>, Inge Fourneau<sup>1,‡</sup>, Sarah Thomis<sup>1,‡</sup>  
17  
18  
19  
20  
21  
22  
23

24 ‡ Contributed equally as last author to the SurLym trial  
25

26 <sup>1</sup>University Hospitals Leuven, Department of Vascular Surgery, Centre for Lymphedema, Leuven,  
27 Belgium  
28

29 <sup>2</sup>KU Leuven – University of Leuven, Department of Rehabilitation Sciences, Leuven, Belgium  
30

31 <sup>3</sup>KU Leuven – University of Leuven, Leuven Biostatistics and Statistical Bioinformatics Centre (L-  
32 BioStat), Leuven, Belgium  
33

34 <sup>4</sup>KU Leuven – University of Leuven, Centre for Environment and Health, Leuven, Flanders, Belgium  
35

36 <sup>5</sup>University Hospitals Leuven, Department of Plastic and Reconstructive Surgery, Leuven, Belgium  
37

38 <sup>6</sup>University Hospitals Leuven, Department of Radiology, Leuven, Belgium  
39

40 <sup>7</sup>CHU UCL Namur – Site Godinne, Department of Physical Medicine and Rehabilitation, Centre de  
41 Reference du Lymphoedème, Yvoir, Belgium  
42

43 <sup>8</sup>CHU UCL Namur – Site St-Elisabeth, Department of Plastic and Reconstructive Surgery, Namur,  
44 Belgium  
45

46 <sup>9</sup>CHU UCL Namur – Site Godinne, Nuclear Medicine Department, Université catholique de Louvain,  
47 Yvoir, Belgium  
48

49 <sup>10</sup>CHU UCL Namur – Site Godinne, Department of Radiology, Yvoir, Belgium  
50

51 <sup>11</sup>Ghent University Hospital, Department of Thoracic and Vascular Surgery, Lymphedema Clinic,  
52 Ghent, Belgium  
53  
54  
55  
56  
57  
58  
59  
60

1  
2  
3 <sup>12</sup>Ghent University Hospital, Department of Radiotherapy, Lymphedema Clinic, Ghent, Belgium

4  
5 <sup>13</sup>Ghent University Hospital, Department of Plastic and Reconstructive Surgery, Lymphedema Clinic,  
6  
7 Ghent, Belgium

8  
9 <sup>14</sup>Ghent University Hospital, Department of Physical Medicine and Rehabilitation, Lymphedema  
10  
11 Clinic, Ghent, Belgium

12  
13 <sup>15</sup>Ghent University Hospital, Department of Radiology, Ghent, Belgium

14  
15  
16 <sup>16</sup>Helsinki University and Helsinki University Hospital, Department of Plastic Surgery, Helsinki, Finland

17  
18 <sup>17</sup>Hospital de la Santa Creu i Sant Pau and the Hospital del Mar of Barcelona, Department of Plastic  
19  
20 Surgery, Barcelona, Spain

21  
22  
23  
24  
25 Correspondence to:

26  
27 Prof. Nele Devoogdt

28  
29 UZ Leuven, centre for lymphedema, Weligerveld 1, 3212 Pellenberg, Belgium

30  
31 00 32 16 34 25 15

32  
33 [nele.devoogdt@kuleuven.be](mailto:nele.devoogdt@kuleuven.be)

34  
35  
36  
37  
38 Support statement: TDV is a post-doctoral research fellow of the Research Foundation – Flanders  
39  
40 (FWO).

## Trial registration data set

|                                               |                                                                                                                                                                                                                                                                                                                                                              |
|-----------------------------------------------|--------------------------------------------------------------------------------------------------------------------------------------------------------------------------------------------------------------------------------------------------------------------------------------------------------------------------------------------------------------|
| Primary registry and trial identifying number | ClinicalTrials.gov Identifier: NCT05064176                                                                                                                                                                                                                                                                                                                   |
| Date of registration in primary registry      | 24-8-2021                                                                                                                                                                                                                                                                                                                                                    |
| Secondary identifying numbers                 | Ethical Committee UZ Leuven: S63212;<br>EudraCT: 2021-000397-29                                                                                                                                                                                                                                                                                              |
| Source of monetary and material support       | Belgian Health Care Knowledge Centre                                                                                                                                                                                                                                                                                                                         |
| Sponsor                                       | University Hospitals Leuven, Clinical Trial center, Herestraat 49,<br>3000 Leuven, Belgium                                                                                                                                                                                                                                                                   |
| Contact for public and scientific queries     | <a href="mailto:Nele.devoogdt@uzleuven.be">Nele.devoogdt@uzleuven.be</a>                                                                                                                                                                                                                                                                                     |
| Public title                                  | Added value of reconstructive lymphatic surgery to usual care in lymphoedema                                                                                                                                                                                                                                                                                 |
| Scientific title                              | Comparison of reconstructive lymphatic <b>surgery</b> versus no surgery, additional to decongestive lymphatic therapy (usual care), for the treatment of <b>lymphoedema</b> , through a multicenter, pragmatic 3andomized controlled trial                                                                                                                   |
| Acronym                                       | SurLym-trial                                                                                                                                                                                                                                                                                                                                                 |
| Protocol version                              | V3.0 19-4-2022                                                                                                                                                                                                                                                                                                                                               |
| Country of recruitment                        | Belgium                                                                                                                                                                                                                                                                                                                                                      |
| Health condition studied                      | Primary or secondary upper or lower limb lymphoedema stage 1 to 2b                                                                                                                                                                                                                                                                                           |
| Intervention                                  | Intervention group: Reconstructive lymphatic surgery (i.e. LVA or LNT or combination), added to usual care<br>Control group: Only usual care (no surgery)                                                                                                                                                                                                    |
| Key inclusion and exclusion criteria          | -Lymphoedema: upper/ lower limb; uni-/ bilateral; primary or secondary; stage 1 to 2b; $\geq 5\%$ volume difference or $\geq 2$ minor/ 1 major lymphoscintigraphy criterion; total score or one domain score of Lymph-ICF questionnaire $\geq 25/100$<br>-History of DLT ( $\geq 6M$ ) until minimal pitting, no liposuction/ reconstructive surgery in past |

|                         |                                                                                                                                                                                                                                                     |
|-------------------------|-----------------------------------------------------------------------------------------------------------------------------------------------------------------------------------------------------------------------------------------------------|
|                         | -In case of lower limb lymphoedema: no CVI C4-C6, no DVT/ PTS<br>-Age $\geq$ 18 years, not pregnant, BMI $\leq$ 35<br>-No allergy for ICG/ iodine; no increased activity/ benign tumor thyroid gland; no heparin use and severe renal insufficiency |
| Study type              | Multicentre, pragmatic randomised controlled trial                                                                                                                                                                                                  |
| Date of first enrolment | March 2022                                                                                                                                                                                                                                          |
| Target sample size      | 180                                                                                                                                                                                                                                                 |
| Recruitment status      | Recruiting                                                                                                                                                                                                                                          |
| Primary endpoint        | Lymphoedema-specific QOL, at 18 months post-baseline                                                                                                                                                                                                |
| Key secondary endpoints | Limb volume, at 18 months post-baseline<br>Duration of wearing the compression garment, at 18 months post-baseline                                                                                                                                  |
| Treatment duration      | 18 months (usual care)                                                                                                                                                                                                                              |
| Follow up duration      | 36 months                                                                                                                                                                                                                                           |

## Abstract

### Introduction

Lymphoedema is a chronic condition caused by lymphatic insufficiency. It leads to swelling of the limb/ midline region and an increased risk of infection. Lymphoedema is often associated with mental and physical problems limiting quality of life. The first choice of treatment is a conservative treatment, consisting of exercises, skin care, lymph drainage and compression. Reconstructive lymphatic surgery is also often performed, i.e. lymphovenous anastomoses (LVA), lymph node transfer (LNT), or a combination. Currently, scientific evidence for reconstructive lymphatic surgery is not of high quality. Therefore, the objective of this trial is to investigate the added value of reconstructive lymphatic surgery to the conservative treatment in patients with lymphoedema.

### Methods and analysis

A multicentre randomised controlled and pragmatic trial was started since March 2022 in 3 Belgian university hospitals. Ninety patients with arm lymphoedema and 90 patients with leg lymphoedema will be included. All patients are randomised between conservative treatment alone (control group) or conservative treatment with reconstructive lymphatic surgery (intervention group). Assessments are performed at baseline and at 1, 3, 6, 12, 18, 24 and 36 months. The primary outcome is lymphoedema-specific quality of life at 18 months. Key secondary outcomes are limb volume and duration of wearing the compression garment at 18 months. The approach of reconstructive lymphatic surgery is based on pre-surgical investigations including clinical examination, lymphofluoroscopy, lymphoscintigraphy, lymph MRI or CT angiography (if needed). All patients receive conservative treatment during 36 months, which is applied by the patient's own physical therapist and by the patient self. From month 7-12, the hours a day of wearing the compression garment are gradually decreased.

### Ethics and dissemination

The study has been approved by the ethical committees of University Hospitals Leuven, Ghent University Hospital and CHU UCL Namur. Results will be disseminated via peer-reviewed journals and presentations.

ClinicalTrials.gov Identifier: NCT05064176

Keywords: lymphedema, reconstructive surgery, surgical anastomosis, surgical flap

Word count: 4421 (up to data security and management), 5185 for all parts



### Strengths and limitations of this study

- 1) This trial is stratified and powered for the effect of reconstructive surgery in both arm and leg lymphoedema and will permit a conclusion regarding the effect of reconstructive lymphatic surgery in both of these groups.
- 2) High-qualitative reconstructive lymphatic surgery procedures will be performed: a) Independent experts in reconstructive lymphatic surgery are involved in the Trial Steering Committee and have trained the surgeons of the 3 study centers; in this way, standardisation and quality of the surgical procedure is guaranteed; b) Advanced imaging techniques (i.e. ICG lymphofluoroscopy, lymph MRI, lymphoscintigraphy and CT angiography) are used to prepare the surgical procedure in the trial.
- 3) A comprehensive evaluation of the participants with lymphoedema will be performed: a lymphoedema-specific quality of life outcome is assessed, which is a self-reported outcome (= primary outcome) and limb volume and duration of wearing the compression garment as well, which are objective outcomes (= key secondary outcomes).
- 4) If reconstructive lymphatic surgery is found effective, detailed inventory of cost and quality of life will permit a cost-effectiveness analysis.
- 5) Besides a statistical plan (developed by statistician SF), also a monitoring plan, data management plan, communication plan and risk assessment plan has been set in place.

## INTRODUCTION

Lymphoedema is a chronic and debilitating condition caused by lymphatic insufficiency. It leads to swelling of the limb/ midline region and an increased risk of infection. It can be classified as primary (congenital) or secondary (acquired) lymphoedema. Lymphoedema is very burdensome for the patient, often causing mental problems such as frustration and stress.<sup>1</sup> In addition, due to the increase in volume of the limb, patients may develop physical problems, such as pain, heaviness, loss of strength, as well as functional problems with household, mobility or social activities.<sup>2</sup> These mental, physical and functional problems have a negative impact on the quality of life and the ability to work.<sup>3</sup>

There is consensus that the first choice of treatment of lymphoedema is a conservative treatment, also called decongestive lymphatic therapy (DLT).<sup>4,5</sup> In case of pitting oedema, this consists of an intensive daily treatment to maximally reduce the oedema volume. This phase consists of skin care, manual lymph drainage, multilayer bandaging and exercise therapy. Once that sufficient reduction of the pitting is obtained and the patients receive education to improve their self-management skills, the maintenance phase starts, which aims at stabilising the results obtained in the previous phase. During the maintenance phase, skin care, exercises and lymph drainage are continued but bandaging is replaced by low-stretch compression garments. Professional's involvement can be minimised in this phase.

Reconstructive lymphatic surgery is another treatment option, consisting of either lymphovenous anastomoses (LVA), lymph node transfer (LNT) or a combination of both. The choice can be based on the surgeons clinical judgement or on local algorithms, as the Barcelona Lymphoedema Algorithm.<sup>6</sup> The objective of LVA is to redirect the lymph to the venous stream directly, bypassing areas of obstruction, and without going through the thoracic duct. LVA is applied if functional lymphatics can be localized, primarily by ICG lymphofluoroscopy and lymph MRI.<sup>7</sup> With LNT, orthotopically placed lymph nodes act as a sponge to absorb lymphatic fluid and direct it into the vascular network. The transferred nodes induce lymphangiogenesis and if they are placed in the site of lymphadenectomy, scar tissue and adhesions are removed to improve vascularisation.<sup>5,8</sup> Indications for LNT are a total occlusion of lymphatic transport visualised through lymphoscintigraphy and a stage 2 lymphoedema with repeated episodes of erysipelas. Only subjects who had a history of at least 6 to 12 months of conservative treatment with good decongestion of the limb are candidates for reconstructive lymphatic surgery.<sup>7</sup>

1  
2  
3 Our hypothesis is that reconstructive lymphatic surgery partially restores the lymphatic transport  
4 which leads to a decrease of the lymphoedema volume and as a result lowers the need for a  
5 compression garment. This will probably improve lymphoedema-specific quality of life.  
6  
7

8  
9 Robust evidence on the effectiveness of reconstructive lymphatic surgery for lymphoedema has so  
10 far not been procured. In 2019, a Cochrane systematic review of Markkula et al revealed that there is  
11 not enough high-quality research investigating the effect of reconstructive lymphatic surgery on  
12 lymphoedema.<sup>9</sup> Only one RCT so far evaluated the effect of LNT. Dionyssiou et al randomised 36  
13 patients with breast cancer related arm lymphoedema.<sup>10</sup> After surgery/no surgery, all patients first  
14 received for 6 months DLT and DLT was discontinued for the next 12 months. At 18 months follow-  
15 up, mean limb volume reduction was superior in the group with LNT compared to no LNT (57% vs  
16 18%,  $p < 0.01$ ). In the group with LNT infections were less frequent and subjective symptoms  
17 improved. An RCT evaluating the effect of LVA has not been performed yet.  
18  
19  
20  
21  
22  
23  
24  
25  
26

## 27 **Objectives**

28  
29 The main objective of this study is to investigate the added value of reconstructive lymphatic surgery  
30 to decongestive lymphatic therapy (usual care) in patients with lymphoedema of the upper limb or  
31 lower limb in terms of lymphoedema-specific QoL (primary outcome), limb volume and duration of  
32 wearing the compression garment (key secondary outcomes) at 18 months and of other outcomes at  
33 1, 3, 6, 12, 18, 24 and 36 months post-baseline (secondary outcomes; see table 1 for the outcomes).  
34  
35

36  
37 A secondary objective is to verify whether the rate of complications in participants receiving  
38 reconstructive lymphatic surgery is acceptable and if so, whether these complications are reversible.  
39  
40 We also verify in patients with lymphoedema due to cancer treatment, if reconstructive lymphatic  
41 surgery causes higher cancer recurrence rates.  
42  
43  
44

45  
46 A first exploratory objective is to compare the added value of the reconstructive surgery between  
47 different subgroups (stage 1 vs stage 2; normal weight vs overweight; combination of LVA and LNT vs  
48 one method). A second exploratory objective is to investigate predictive variables for lymphoedema-  
49 specific QoL at 36 months.  
50  
51  
52  
53  
54  
55  
56  
57  
58  
59  
60

Table 1 Overview of assessment of descriptive variables and primary and secondary outcomes at each time interval

|                                                                                | A1            | A2 | A3 | A4 | A5  | A6  | A7  | A8  |
|--------------------------------------------------------------------------------|---------------|----|----|----|-----|-----|-----|-----|
| Assessment                                                                     | Randomisation | 1M | 3M | 6M | 12M | 18M | 24M | 36M |
| <b>Baseline</b>                                                                |               |    |    |    |     |     |     |     |
| <b>DESCRIPTIVES</b>                                                            |               |    |    |    |     |     |     |     |
| Demographics                                                                   | X             |    |    |    |     |     |     |     |
| Characteristics of lymphoedema and its treatment                               | X             |    |    |    |     |     |     |     |
| <b>PRIMARY OUTCOME</b>                                                         |               |    |    |    |     |     |     |     |
| Self-reported questionnaire                                                    | X             |    |    |    |     | X   |     |     |
| Lymphoedema-specific QoL                                                       |               |    |    |    |     |     |     |     |
| <b>SECONDARY OUTCOMES</b>                                                      |               |    |    |    |     |     |     |     |
| Self-reported questionnaires                                                   |               |    |    |    |     |     |     |     |
| Lymphoedema-specific QoL                                                       | X             | X  | X  | X  | X   |     | X   | X   |
| Duration (key secondary outcome) and experience of wearing compression garment | X             | X  | X  | X  | X   | X   | X   | X   |
| Health related QoL                                                             | X             | X  | X  | X  | X   | X   | X   | X   |
| Work capacity and ability                                                      | X             | X  | X  | X  | X   | X   | X   | X   |
| Physical activity level                                                        | X             | X  | X  | X  | X   | X   | X   | X   |
| Costs related to lymphoedema and its treatment*                                |               | X  | X  | X  | X   | X   | X   | X   |
| Usual care & self-management*§, including need for intensive treatment         |               | X  | X  | X  | X   | X   | X   | X   |

1  
2  
3 Assessments  
4

5 Limb volume (key secondary  
6 outcome) X X X X X X X X X  
7  
8  
9 Hand/ foot volume X X X X X X X X X  
10  
11  
12 Failure to reduce hours a day  
13 of wearing compression X X X X  
14 stocking  
15  
16  
17 Body weight X X X X X X X X X  
18  
19  
20 Infection previous 18 months X X X  
21  
22 Recurrence of cancer X X  
23  
24  
25 Adverse events and  
26 complications of surgery X X X X X X X X  
27  
28  
29 Lymphatic transport  
30  
31 ICG fluoroscopy X X  
32  
33 Lymphoscintigraphy X X  
34

35  
36 \* Information is collected on a monthly basis

37 § No secondary outcome  
38  
39  
40  
41  
42

43 **METHODS AND ANALYSIS**  
44

45 Described according to the SPIRIT guidelines.  
46  
47  
48  
49

50 **Trial design and study setting**  
51

52  
53 A multicentre, pragmatic randomised controlled trial is performed at three university hospitals in  
54 Belgium: University Hospitals Leuven (UZ Leuven), Ghent University Hospital (UZ Gent) and CHU UCL  
55 Namur.  
56

57  
58 The general flow, starting from screening for eligibility, is shown in figure 1.  
59  
60

1  
2  
3 Before the real screening (A0), a fast eligibility check is performed and Informed Consent Form is  
4 signed. If the patient is eligible and confirms participation, he/ she is randomised. The interval  
5 between screening (A0) and baseline assessment (A1) is ideally less than 3 months, but may be up to  
6 6 months. The baseline assessments have to be performed shortly before the surgery, with a  
7 maximal interval of 1 month.  
8  
9  
10

11  
12  
13 Figure 1. Flow diagram of SurLym trial  
14  
15

### 16 **Patient and public involvement in the trial design**

17  
18 Four patients with arm lymphoedema and 3 patients with leg lymphoedema from the center for  
19 lymphedema of UZ Leuven have completed a questionnaire about the study design and feasibility of  
20 the SurLym study. All but one patient, found the primary outcome, assessment of lymphoedema-  
21 specific QoL, a relevant and very important outcome. This patient preferred arm volume (which is a  
22 key secondary outcome) as outcome measure. None of the patients objected to a technical  
23 examination using an injection in the hand/ foot of the affected side (for imaging of the lymphatic  
24 system). All patients found it feasible to come to the hospital for 8 study-visits during 36 months, well  
25 aware that two of the visits take up to 6 hours. Three of seven patients were not keen to undergo  
26 surgery at the affected limb. All patients declared having little problems performing usual care: only  
27 one patient considered self-management difficult and another patient was afraid to reduce the hours  
28 of wearing the compression garment.  
29  
30  
31  
32  
33  
34  
35  
36

37  
38 From the patients willing to be part of the trial's patient board (n=5), two patients were selected: one  
39 patient with arm lymphoedema and one with leg lymphoedema. They are both member of the Trial  
40 Steering Committee. The rationale and design of the trial was thoroughly discussed with them. They  
41 will be invited to further participate during the future meetings of the Trial Steering Committee, to  
42 advise us during the course of the trial and for the dissemination of the project results.  
43  
44  
45  
46  
47  
48

### 49 **Eligibility criteria**

50  
51 Patients *eligible for inclusion* in the trial have to meet all of the following criteria:

- 52 1) Unilateral or bilateral, primary or secondary lymphoedema of the upper or lower limb;
  - 53 2) If cancer-related lymphoedema, approval for participation from the multidisciplinary oncological  
54 board; participation only if estimated cancer-related survival is  $\geq 3$  years and no concerns on  
55 oncological safety are raised;
  - 56 3) Lymphoedema stage 1 to 2b (according to staging 1-3 of International Society of Lymphology)<sup>5</sup>;
- 57  
58  
59  
60

- 4) Objective diagnosis of lymphoedema:  $\geq 5\%$  volume difference OR  $\geq 2$  minor/ 1 major criteria on lymphoscintigraphy OR presence of ICG dermal backflow;
- 5) Total score or one of domain scores on Lymph-ICF questionnaire at screening:  $\geq 25/ 100$  (= moderate level of problems in functioning related to the development of lymphoedema)<sup>11</sup>;
- 6) History of at least 6 months of DLT until minimal pitting;
- 7) Age  $\geq 18$  years.

Following persons are *excluded*:

- 1) Persons with history of liposuction, LVA or LNT;
- 2) Persons who are pregnant or plan to become pregnant in the next 18 months;
- 3) Severely obese participants: BMI $>35$ ;
- 4) In case of lower limb lymphoedema: presence of chronic venous insufficiency C4, C5, C6; deep venous thrombosis; post-thrombotic syndrome;
- 5) Allergy for ICG, iodine; increased activity of thyroid gland; benign tumour in thyroid gland; heparin use and severe renal insufficiency

### **Recruitment, participant screening and consent**

The recruitment of patients started in March 2022. One hundred eighty patients have to be recruited by the 3 hospitals. Initially a recruitment period of 24 months (= 7.5 pts/ month) was planned however difficulties in accessing operating theatres linked to COVID have caused delays. To make the recruitment period as short as possible, a competitive recruitment is applied. We estimate that around 20% of the patients screened for eligibility (A0, n=900) can be accepted for participation.

Identification of eligible patients will be performed by the (sub)investigators of the lymphoedema centres of the 3 hospitals (ST, BBH, AKH and ND for UZ Leuven; CM, CR, TD, VVB, MDS for UZ Gent; and TD, JF, MS, AB, PF for CHU UCL Namur), supported by the study coordinators. The consultation lists of the lymphoedema centres are screened before the consultation and the possible patients eligible for the trial are marked.

During the lymphoedema consultation, the clinician checks the eligibility criteria for which a measurement is not necessary; if the patient seems eligible and he/ she is interested to receive information about the trial, the trial is discussed using a study-specific recruitment document: this is a concise and well-organised document that clarifies the design of the study and provides information about side effects, costs and potential benefits and harms of participation. If a patient is interested to participate, he/ she receives the Informed Consent Form and the 'study at a glance

1  
2  
3 (summary)' document. In addition, the patient receives an appointment for the screening (A0). Some  
4 patients are informed about the trial through another way, e.g. by their oncologist. In that case, the  
5 patient contacts the study coordinator by phone, who performs the fast eligibility check and  
6 discusses the study during the phone call. If the patient is interested to participate, the Informed  
7 Consent Form and the 'study at a glance' document is sent. In addition, the patient receives an  
8 appointment for the screening (A0).  
9

10  
11  
12  
13 During the *screening appointment (A0)*, patients receive all information and explanation they request  
14 or need before signing the Informed Consent Form. Thereafter, the complete screening procedure is  
15 executed to verify whether the participant fulfils all eligibility criteria.  
16  
17

18  
19  
20  
21 In order to optimally recruit patients with lymphoedema, the study is presented inside (at other  
22 departments) as well as outside the hospitals of the study centers by lectures, posters and mailing.  
23 Potential candidates with lymphoedema as well as their treating physicians, physical therapists and  
24 other health care providers are informed about the trial (through social media, publication in local  
25 journals and on websites).  
26  
27  
28  
29

### 30 31 32 **Allocation and randomisation**

33  
34 Given the nature of the trial, *blinding* of participants and care providers (surgeon/ physical therapist/  
35 compression specialist) is not feasible. Because the participants fill out different questionnaires to  
36 determine the primary outcome and some of the secondary outcomes, detection bias may be a  
37 potential risk. However, bias of the participants will be limited as much as possible because the study  
38 will be explained by a neutral person (physical therapists ND, AKH, VVB, MDS, JF or physical medicine  
39 & rehabilitation physician TD (hospital of Ghent), TD (hospital of CHU UCL)).  
40  
41  
42  
43

44  
45 The *randomisation* is computer generated. To obtain concealment of allocation, the randomisation  
46 list is prepared by the trial's statistician (SF) and is incorporated in the data management tool  
47 'REDCap'. Randomisation is performed by using varying block sizes. A 1:1 allocation ratio is applied. A  
48 stratification is applied for study centre (UZ Leuven vs UZ gent vs CHU-UCL Namur) and for region of  
49 lymphoedema (upper limb vs lower limb, with a ratio 1:1). At each participating site, only the chief  
50 investigator (ND) and trial manager (TDV), investigators and study coordinators have access to the  
51 randomisation tool in REDCap. After randomisation, the study coordinator of the specific study  
52 centre plans the intervention if applicable (surgery), as well as the usual care and the follow-up  
53 assessments.  
54  
55  
56  
57  
58  
59  
60



1  
2  
3 After all patients have finished the trial and the database is locked to analyse the data, the  
4 randomisation code will be broken.  
5  
6  
7  
8

### 9 **Intervention**

10 All participants are randomised to the intervention or control group. The intervention group is  
11 treated with reconstructive lymphatic surgery in addition to conservative DLT (decongestive  
12 lymphatic therapy; usual care). In the control group patients only receive conservative DLT (usual  
13 care) without surgery (see figure 1).  
14  
15  
16  
17  
18

19 The researchers will follow the protocol as strictly as possible. However, since the pragmatic nature  
20 of the trial, a deviation of the protocol is allowed if necessary. This protocol deviation has to be  
21 registered in the protocol deviation log.  
22  
23  
24  
25  
26

#### 27 *Reconstructive lymphatic surgery*

28  
29 The intervention treatment is reconstructive lymphatic surgery and is performed by the team of  
30 vascular and/ or plastic surgeons from each study center (ST and KT of UZ Leuven; BDP and LD of  
31 Ghent University Hospital; and MS, AB and PF of CHU UCL Namur). As reconstructive technique, a  
32 lymphovenous anastomosis (LVA), lymph node transfer (LNT) or a combination of both is applied.  
33 The choice of the technique is determined by the surgeons of the study centre. See table 2 for the  
34 clinical reasoning for each procedure and the technical description of the reconstructive procedure.  
35  
36  
37  
38  
39

40 To obtain standardisation and to ascertain the quality of the reconstructive lymphatic surgery, all  
41 surgeons received training in the Reconstructive Microsurgery European School (by JM and GP) in  
42 May 2021. Moreover, to improve standardisation of the patient selection and the reconstructive  
43 lymphatic procedure between the surgeons and between the centres, every patient that is planned  
44 for surgery in the trial is discussed during a monthly meeting with at least one surgeon per centre  
45 attending. A final quality control measure is that the first 10 surgical procedures are discussed with  
46 the whole surgical team including the independent experts JM, GP, SS and KVL.  
47  
48  
49  
50  
51  
52  
53  
54  
55  
56  
57  
58  
59  
60

Table 2. Overview of the procedure of the lymphovenous anastomosis (LVA) and lymph node transfer (LNT) with the clinical reasoning of the choice and the different steps (based on Chang et al)<sup>7</sup>

| Timing                     |                                                                                    | Lymphovenous anastomosis (LVA)                                                                                                                                                           | Lymph node transfer (LNT)                                                                                                                                                                                                                                                                     |
|----------------------------|------------------------------------------------------------------------------------|------------------------------------------------------------------------------------------------------------------------------------------------------------------------------------------|-----------------------------------------------------------------------------------------------------------------------------------------------------------------------------------------------------------------------------------------------------------------------------------------------|
| Before surgery             | Clinical reasoning based on pre-surgical investigations (see figure 2 for example) | Presence of suitable lymphatic vessel(s), visualised through ICG lymphofluoroscopy and/ or lymph MRI.                                                                                    | Presence of fibrosis or adhesions due to surgery, lymph node dissection and/ or radiotherapy, known through inspection and visualisation of interruption of lymphatic transport by lymphoscintigraphy.<br>Presence of a well-vascularised donor flap (CT angiography is performed if needed). |
| During week before surgery | Compression garment                                                                | Measured by the team of compression specialists of the specific center;<br>Choice of the type of compression garment is made pragmatically, as performed in the real clinical situation. |                                                                                                                                                                                                                                                                                               |
|                            | Registration of compression garment                                                | Compression specialist registers each time after delivery the type of compression material and cost for patient/ health insurance.                                                       |                                                                                                                                                                                                                                                                                               |
| Surgery                    | Material                                                                           | Microsurgical equipment to make anastomoses of vessels with diameter of 0.3-0.8 mm (suture size 11 or 12), supermicro clips, fine bipolar.                                               | Microsurgical equipment to perform vascularised lymph-tissue transfer, suturing vein and artery with suture size 9 or 10, micro clips, fine bipolar.                                                                                                                                          |
|                            | Preparation                                                                        | ICG is injected interdigitally and lymph transport is designed on skin and location(s) of anastomosis is indicated (confirmed by lymph MRI).                                             | To check for the safety not developing limb oedema due to the dissection of lymph nodes, <sup>99m</sup> Tc nanocolloids or ICG                                                                                                                                                                |

|  |              |                                                                                                                                                                                                                                                                                                                                                                                                                                                                                                                                                                                                                                                   |                                                                                                                                                                                                                                                                                                                                                                                                                                                                                                                                                                                                                                                                                          |
|--|--------------|---------------------------------------------------------------------------------------------------------------------------------------------------------------------------------------------------------------------------------------------------------------------------------------------------------------------------------------------------------------------------------------------------------------------------------------------------------------------------------------------------------------------------------------------------------------------------------------------------------------------------------------------------|------------------------------------------------------------------------------------------------------------------------------------------------------------------------------------------------------------------------------------------------------------------------------------------------------------------------------------------------------------------------------------------------------------------------------------------------------------------------------------------------------------------------------------------------------------------------------------------------------------------------------------------------------------------------------------------|
|  |              |                                                                                                                                                                                                                                                                                                                                                                                                                                                                                                                                                                                                                                                   | are injected in 1 <sup>st</sup> web of both hands (in case the donor site is the axilla) or feet (in case the donor site is the groin).                                                                                                                                                                                                                                                                                                                                                                                                                                                                                                                                                  |
|  | Anaesthesia  | General or if wish of patient local                                                                                                                                                                                                                                                                                                                                                                                                                                                                                                                                                                                                               | General                                                                                                                                                                                                                                                                                                                                                                                                                                                                                                                                                                                                                                                                                  |
|  | Procedure    | <ol style="list-style-type: none"> <li>1) Patent blue is injected distal of location of anastomosis.</li> <li>2) 2-3 cm incision.</li> <li>3) Functional lymphatic is dissected, lymphatic is kept wet and lumen is made open; picture is taken.</li> <li>4) Lymphatic is anastomosed to vein.</li> <li>5) Between 1 and 10 anastomoses are made.</li> <li>5) With ICG camera is checked whether anastomosis is open.</li> <li>6) Wound is covered and cotton wool and elastic bandages are applied around the whole limb.</li> </ol>                                                                                                             | <ol style="list-style-type: none"> <li>1) ICG is injected interdigitally.</li> <li>2) Patent blue is injected distal of donor side flap.</li> <li>3) Donor site flap is resected (= lymph nodes and skin and tissue around): in most cases groin proximal of inguinal ligament, sometimes lateral trunk; picture is taken.</li> <li>4) Donor site flap is transferred to recipient site (= region with fibrosis/ adhesion): a wide excision of scar tissue is made to ensure a healthy bed for lymphangiogenesis and to improve bridging of lymphatics; picture is made.</li> <li>5) Wound is covered and cotton wool and elastic bandages are applied around the whole limb.</li> </ol> |
|  | Registration | <ol style="list-style-type: none"> <li>1) Duration of procedure (in minutes).</li> <li>2) Description of procedure: LVA vs LNT vs combination; general vs local anaesthesia; per-operative ICG fluoroscopy or scintigraphy; injection patent blue and localisation; for LVA, number of anastomoses and location; for LNT, donor site and recipient site.</li> <li>3) Material (amount): flacon ICG/ patent blue; surgical wire; wound dressing; bandaging material (cotton wool, non-elastic bandages, tubular bandage); other material</li> <li>4) Personnel (number and duration of presence): surgeon(s); nurse(s); other personnel</li> </ol> |                                                                                                                                                                                                                                                                                                                                                                                                                                                                                                                                                                                                                                                                                          |

|                                                                      |                       |                     |                                                                                                                                                                                                                                                                                    |                               |
|----------------------------------------------------------------------|-----------------------|---------------------|------------------------------------------------------------------------------------------------------------------------------------------------------------------------------------------------------------------------------------------------------------------------------------|-------------------------------|
| 1<br>2<br>3<br>4<br>5<br>6                                           | Aftercare in hospital | Number of days      | 1 day or longer if necessary                                                                                                                                                                                                                                                       | 2 days or longer if necessary |
| 7<br>8<br>9<br>10<br>11<br>12                                        |                       | Medication          | To prevent thrombosis, to stimulate vasodilation, to reduce pain, to prevent infection                                                                                                                                                                                             |                               |
| 13<br>14<br>15<br>16<br>17<br>18<br>19                               |                       | Inelastic bandage   | In most of the patients (if risk of damaging LVA/ LNT by putting on compression garment;<br>First tubular bandage and cotton wool covering whole limb, then non-elastic bandages, finally other tubular bandage over bandages (to keep everything together); keep it day and night |                               |
| 20<br>21<br>22<br>23                                                 |                       | Advise              | As much as possible limb elevation and regularly muscle contractions                                                                                                                                                                                                               |                               |
| 24<br>25<br>26<br>27<br>28<br>29<br>30<br>31<br>32<br>33<br>34<br>35 |                       | Registration        | 1) Number of days of hospitalisation<br>2) Material (amount): bandaging material (cotton wool, non-elastic bandages, tubular bandage); other material<br>3) Medication (type and amount)                                                                                           |                               |
| 36<br>37<br>38<br>39<br>40<br>41<br>42<br>43<br>44<br>45<br>46       | Aftercare at home     | Wound control       | Once a week, inelastic bandage is removed, wound is cared and bandage is re-applied                                                                                                                                                                                                |                               |
|                                                                      |                       | Advise              | As much as possible limb elevation and regularly muscle contractions                                                                                                                                                                                                               |                               |
|                                                                      |                       | Compression garment | If wound is healed, new compression garment is applied and usual care protocol is started                                                                                                                                                                                          |                               |
|                                                                      |                       | Registration        | 1) Number of wound control visits and duration<br>2) Material (amount): bandaging material (cotton wool, non-elastic bandages, tubular bandage); wound care material; other material<br>3) Personnel (number and duration of presence): surgeon(s); nurse(s); other personnel      |                               |

1  
2  
3 Figure 2 Woman, 57 years old, secondary lymphoedema right leg (> left leg) and midline, developed  
4 after inguinal and pelvic lymph node dissection and radio-chemotherapy for vulvar cancer;

5  
6 Preoperative investigations: A) *lymphoscintigraphy in 3 phases*: 1. early phase after rest, 2.  
7 early phase after activity (cycling), 3. late phase after activity (walking); demonstrating  
8 dermal backflow at lower and upper leg (dotted arrow) and a lymph node in the groin (\*); B)  
9  
10 *ICG lymphofluoroscopy*; 1. Picture of limb with markings of the superficial lymphatic  
11 architecture; 2. Body diagram; demonstrating dermal backflow (dotted arrow) and two useful  
12 lymph collectors at the level of the knee (full arrow), c) *lymph MRI*; confirming the presence  
13 of two useful lymph collectors (full arrow);  
14  
15

16  
17 Based on preoperative investigations, choice of reconstructive lymphatic surgery: LVA at the  
18 level of the knee; no LNT because of pelvic lymph node dissection and activity (working  
19 lymph node) in the groin.  
20  
21  
22  
23  
24  
25  
26  
27

### 28 Usual care

29  
30 All patients receive usual care. The patient's own (regular) physical therapist performs the usual care  
31 in a pragmatic way consisting of exercises and skin care and manual lymph drainage (MLD) (i.e. the  
32 maintenance phase of decongestive lymphatic therapy (DLT)). Moreover, the physical therapist  
33 educates the patient to perform self-management, i.e. self-exercises, self-skin care, self-MLD, self-  
34 bandaging and putting on and removing the compression garment. In all patients (of intervention  
35 and control group), a new compression garment is measured by the compression specialist at  
36 baseline. The schematic overview of the usual care is given in figure 1 and is divided into four  
37 periods:  
38  
39  
40  
41  
42  
43

44 1) M1-6: From week 3 (or, in the intervention group, after healing of the wounds) the patient sees  
45 the home physical therapist twice per week and from week 5 once a week. The patient also performs  
46 self-management.  
47  
48

49  
50 2) M7-12: The patient sees the own physical therapist once a week. The compression garment use is  
51 gradually reduced from 16h/w (end of 6<sup>th</sup> month) to 0h/w (end of 12<sup>th</sup> month). The own physical  
52 therapist performs circumference measurements of the limb weekly (i.e. with a perimeter provided  
53 by the study team) to control for changes of the limb volume<sup>12</sup>. The patient completes a digital  
54 scoring form in REDCap weekly. The study investigator of the center checks the change of limb  
55 volume every week: if the limb volume increases  $\geq 5\%$  compared to baseline, the patient is planned  
56  
57  
58  
59  
60

1  
2  
3 for an intermediate checkup in the study center. The study investigator decides whether the hours a  
4 day of wearing the compression garment has to be increased again.

5  
6  
7 3) M13-18: The patient only performs self-management and does not see the own physical therapist  
8 anymore. If possible, the patient does not wear the compression garment.

9  
10  
11 4) M19-36: The patient may choose whether he/ she visits the own physical therapist or performs  
12 self-management, or a combination.

13  
14  
15 This scheme of usual care has to be followed as strictly as possible, except when the patient's clinical  
16 situation deteriorates or risks to deteriorate. For example, a patient may visit the physical therapist  
17 more often in case of more lymphoedema-related complaints due to warm weather. Or, if during the  
18 follow-up, the clinical situation of the lymphoedema deteriorates unacceptably (e.g. there is  
19 presence of pitting oedema in the limb or there is a wound), the study investigator may advise the  
20 patient and physical therapist to perform an intensive treatment of the lymphoedema with  
21 bandaging. This information has to be registered by the patient in the usual care questionnaire.

22  
23  
24 To obtain standardisation of the usual care, the physical therapist of the patient receives a training  
25 before the start of the study. During this training, instructions about the study protocol are given  
26 orally. In addition, the physical therapist receives an informative leaflet explaining the aim and design  
27 of the trial, the treatment in the intervention/ control group and the assessment of the patient. It  
28 also clarifies what the study investigators expect from the patient's physical therapist and vice-versa.  
29 Following information regarding the patient's physical therapist is collected: age and gender,  
30 education level and experience with treating lymphoedema (number of years of experience and in  
31 which modalities, type of lymphoedema education).

## 32 33 34 35 36 37 38 39 40 41 42 43 44 **Outcomes**

45  
46 The outcome measures were chosen based on input from patients with lymphoedema (see section  
47 'patient and public involvement') and on input from the investigators of this trial who have  
48 experience in evaluating and treating patients with lymphoedema. Moreover, recently, Chang et al  
49 stated in their systematic review and meta-analysis about the surgical treatment of lymphoedema  
50 that better designed studies are necessary: with objective reporting of outcomes using quantitative  
51 methods for measuring fluid and both physiologic and immunologic function during longer follow-  
52 up.<sup>13</sup>

1  
2  
3 Assessments are performed at baseline (A1) and at 1 month (A2), 3 months (A3), 6 months (A4), 12  
4 months (A5), 18 months (A6), 24 months (A7) and 36 months (A8) post-baseline. However, to limit  
5 the burden for the patients, not all outcomes are assessed at each time interval. See table 1 for the  
6 overview of the outcomes per time interval and see table 3 for the assessment method and the  
7 description of the assessment per variable and outcome. Figure 1 gives an overview of the timing of  
8 the baseline assessment related to the screening and to the surgery, and of the foreseen windows  
9 for the follow-up assessments.  
10  
11  
12  
13  
14

15 The primary outcome is lymphoedema-specific QoL (= problems in functioning related to  
16 development of lymphoedema) at 18 months, evaluated with the Dutch or French version of the  
17 Lymph-ICF questionnaire for upper or lower limb lymphoedema.<sup>11 14-16</sup> In addition, the  
18 lymphoedema-specific QoL will be investigated at other time points in the short term (1, 3, 6, 12  
19 months) and longer term (24 and 36 months) as a secondary outcome parameter.  
20  
21  
22  
23  
24

25 Other secondary outcomes are: duration of wearing the compression garment during one week (at  
26 18 months' time-point = key secondary outcome) and experience of the compression garment,  
27 health-related QoL, work capacity and ability, physical activity level, costs related to lymphoedema  
28 and its treatment, need for intensive treatment, limb volume (at 18 months' time-point = key  
29 secondary outcome) and hand/ foot volume, failure to reduce the hours a day of wearing the  
30 compression garment, body weight, episodes of infection previous 18 months, recurrence of cancer  
31 (in patients with history of cancer), adverse events and lymphatic transport.  
32  
33  
34  
35  
36

37 Complications of surgery (in the intervention group) and information regarding usual care and self-  
38 management are collected during the trial period as well.  
39  
40

41 There is also a follow-up contact by phone at 9M and 15M, respectively. During the phone call,  
42 information is further collected about adverse events and complications of the surgery, about the  
43 usual care & self-management (to check for the adherence of the patient) and about the costs  
44 related to lymphoedema and its treatment.  
45  
46  
47

48 To guarantee standardisation of the assessments all assessors are trained before the start of the trial.  
49  
50  
51  
52  
53  
54  
55  
56  
57  
58  
59  
60

Table 3 Overview of the different variables in the SurLym trial, the assessment method and the description of the method

| Variable                                                                                                   | Assessment method; description of method                                                                                                                                                                                                                                                                                           |
|------------------------------------------------------------------------------------------------------------|------------------------------------------------------------------------------------------------------------------------------------------------------------------------------------------------------------------------------------------------------------------------------------------------------------------------------------|
| <b>Descriptives (15 min)</b>                                                                               |                                                                                                                                                                                                                                                                                                                                    |
| Demographics                                                                                               |                                                                                                                                                                                                                                                                                                                                    |
| Age (in years)                                                                                             | Medical file                                                                                                                                                                                                                                                                                                                       |
| Gender (man vs women),<br>smoking status (smoking vs<br>non-smoking), living status<br>(alone vs together) | Interview                                                                                                                                                                                                                                                                                                                          |
| Body height (in m)                                                                                         | Stadiometer                                                                                                                                                                                                                                                                                                                        |
| Comorbidity (yes vs no)                                                                                    | Self-reported questionnaire developed by IDEWE (= external institute for prevention and protection at work); presence of wound by accident, of disease of musculoskeletal, circulatory, respiratory, neurological, digestive, urinary system, of disease of blood or skin, of mental or metabolic problems or of tumor (yes vs no) |
| Educational level (low vs<br>high)                                                                         | Interview; lower education = primary and secondary school, higher education = non-university higher and university                                                                                                                                                                                                                 |
| Anxiety and depression (0-<br>42)                                                                          | Self-reported Hospital Anxiety and Depression Scale; <sup>17</sup> 14 statements regarding anxiety and depression with score 0-3                                                                                                                                                                                                   |



1  
2  
3  
4  
5  
6  
7  
8  
9  
10  
11  
12  
13  
14  
15  
16  
17  
18  
19  
20  
21  
22  
23  
24  
25  
26  
27  
28  
29  
30  
31  
32  
33  
34  
35  
36  
37  
38  
39  
40  
41  
42  
43  
44  
45  
46

Characteristics of  
lymphoedema and its  
treatment

Duration of lymphoedema  
(in months)

Interview

Localisation of  
lymphoedema (yes vs no)

Inspection; for upper limb lymphoedema: hand/ lower arm/ upper arm/ trunk or  
for lower limb lymphoedema: foot/ lower leg/ upper leg/ pelvic/ genital region, unilateral/ bilateral, site of lymphoedema  
followed in trial: left/ right

Pitting status (yes vs no)

Palpation; for upper limb lymphoedema: hand/ lower arm/ upper arm/ trunk or for lower limb lymphoedema: Foot/ lower  
leg/ upper leg/ pelvic/ genital region

Stage of lymphoedema (1  
vs 2a vs 2b)

Inspection en palpation; Stage 1= pitting oedema that disappears with limb elevation (= reversible), 2a= pitting oedema  
that does not disappear completely with limb elevation, 2b= further decrease of pitting and accumulation of fat tissue

Primary or secondary  
lymphoedema

Interview and medical file; Primary = congenital; secondary = acquired after cancer-treatment (and type of cancer),  
trauma, surgery, infection

History of conservative  
treatment

Self-reported questionnaire (developed by author); Information regarding 1) physical therapy: number of years, number of  
sessions last month/ year, content, 2) intensive treatment: where, how often, 3) other care giver, 4) self-management

---

**Primary outcome**

---

Self-reported questionnaire

1  
2  
3 (5 min)

4  
5  
6 Lymphoedema-specific Lymph-ICF questionnaire Dutch or French version for upper or lower limb lymphoedema;<sup>11 14 15 18 28</sup> and 29 questions on  
7 QoL (0-100) 11-point scale between 0-10, total score between 0-100 (0= no problems in functioning related to the development of  
8 lymphoedema)  
9  
10

11 **Secondary outcomes**

12  
13  
14 Self-reported questionnaires

15 (60 min)

16  
17  
18 Lymphoedema-specific See primary outcome; in addition, score on 5 domains, i.e. physical function, mental function, household, mobility and life  
19 QoL (0-100) and social life domain (0-100)  
20

21  
22 Duration (key secondary  
23 outcome) and experience ICC compression questionnaire ;<sup>19</sup> Dosage (0-168 hours/ week), application/ removing compression (0-10), comfort (score  
24 of wearing compression between 0-10), complication (score between 0-10), general experience (0-10)  
25 garment  
26  
27

28  
29 Health related QoL EuroQoL-5D-5L;<sup>20</sup> 5 items about mobility, self-care, activity, pain and anxiety (each dimension has 5 levels: no problems,  
30 slight problems, moderate problems, severe problems and extreme problems), range between -0.33 for situation '33333'  
31 (severe problems on all items) and 1 for situation '11111' (complete healthy)  
32  
33

34  
35 Work capacity and ability Work Productivity and Activity Impairment questionnaire (WPAI-GH); Impairment while working due to health, overall  
36 work impairment due to health, activity impairment due to health (%)  
37  
38

39 QuickScan 18 – short version;<sup>21</sup> Chance for successful socio-professional reintegration (score between 0 certainly not and 5  
40  
41

|    |                           |                                                                                                                                                                |
|----|---------------------------|----------------------------------------------------------------------------------------------------------------------------------------------------------------|
| 1  |                           |                                                                                                                                                                |
| 2  |                           |                                                                                                                                                                |
| 3  |                           | certainly yes)                                                                                                                                                 |
| 4  |                           |                                                                                                                                                                |
| 5  | Physical activity level   | International Physical Activity Questionnaire; <sup>22</sup> 7 questions about hours a week of vigorous (8 MET), moderate (4 MET) and                          |
| 6  | (MET-hours a week)        | walking activities (3.3 MET), and sitting time                                                                                                                 |
| 7  |                           |                                                                                                                                                                |
| 8  | Costs related to          | Study-specific questionnaire completed monthly by the patient; collection of patient and health care costs for material                                        |
| 9  | lymphoedema and its       | (such as compression or exercise material), medication, diagnostics or care giver (similar questionnaire as for Effort-BCRL                                    |
| 10 | treatment (in euro)       | trial) <sup>23</sup>                                                                                                                                           |
| 11 | Usual care & self-        |                                                                                                                                                                |
| 12 | management \$, including  | Study-specific usual care & self-management questionnaire completed monthly by the patient; information regarding 1)                                           |
| 13 | need for intensive        | physical therapy: number of sessions, duration and content; 2) intensive treatment: where, number of sessions, content;                                        |
| 14 | treatment                 | 3) other care giver; 4) self-management: number of days of each modality                                                                                       |
| 15 |                           |                                                                                                                                                                |
| 16 | Assessment (60 min)       |                                                                                                                                                                |
| 17 |                           |                                                                                                                                                                |
| 18 | Limb volume (key          | Circumference measurements every 4 cm with perimeter; <sup>12 24-26</sup> limb volume is calculated with formula of truncated                                  |
| 19 | secondary outcome)        | cone, <sup>24 26</sup> in participants with upper limb lymphoedema: assessment of affected and non-affected arm; outcome is                                    |
| 20 |                           | excessive arm volume (%) = (volume <sub>AFFECTED ARM</sub> - volume <sub>UNAFFECTED ARM</sub> / volume <sub>UNAFFECTED ARM</sub> ) x 100, in participants with |
| 21 |                           | lower limb lymphoedema: assessment of affected leg (= leg that is followed in trial); outcome is whole leg volume (in ml)                                      |
| 22 |                           | Water displacement method of hand or foot; <sup>25 27</sup> volume is the mass of the displaced water, in participants with upper                              |
| 23 | Hand/ foot volume         | limb lymphoedema: assessment of affected and non-affected hand, outcome is excessive hand volume (%); in participants                                          |
| 24 |                           | with lower limb lymphoedema: assessment of affected foot, outcome is foot volume (in ml)                                                                       |
| 25 |                           |                                                                                                                                                                |
| 26 | Failure to reduce hours a | Assessor determines whether participant is able to reduce the hours a day of wearing the compression garment as stated                                         |
| 27 | day of wearing            | by the protocol (see figure 1, M7-12); Not able = excessive arm volume/ leg volume increased more than the smallest real                                       |
| 28 |                           |                                                                                                                                                                |
| 29 |                           |                                                                                                                                                                |
| 30 |                           |                                                                                                                                                                |
| 31 |                           |                                                                                                                                                                |
| 32 |                           |                                                                                                                                                                |
| 33 |                           |                                                                                                                                                                |
| 34 |                           |                                                                                                                                                                |
| 35 |                           |                                                                                                                                                                |
| 36 |                           |                                                                                                                                                                |
| 37 |                           |                                                                                                                                                                |
| 38 |                           |                                                                                                                                                                |
| 39 |                           |                                                                                                                                                                |
| 40 |                           |                                                                                                                                                                |
| 41 |                           |                                                                                                                                                                |
| 42 |                           |                                                                                                                                                                |
| 43 |                           |                                                                                                                                                                |
| 44 |                           |                                                                                                                                                                |
| 45 |                           |                                                                                                                                                                |
| 46 |                           |                                                                                                                                                                |

|    |                             |                                                                                                                                                              |
|----|-----------------------------|--------------------------------------------------------------------------------------------------------------------------------------------------------------|
| 1  |                             |                                                                                                                                                              |
| 2  |                             |                                                                                                                                                              |
| 3  | compression stocking (yes,  | difference, i.e. 5% or more compared to baseline <sup>12</sup>                                                                                               |
| 4  | not able vs no, able)       |                                                                                                                                                              |
| 5  |                             |                                                                                                                                                              |
| 6  |                             |                                                                                                                                                              |
| 7  | Body weight (in kg)         | Scale                                                                                                                                                        |
| 8  |                             |                                                                                                                                                              |
| 9  | Infection previous 18       |                                                                                                                                                              |
| 10 | months (number)             | Interview                                                                                                                                                    |
| 11 |                             |                                                                                                                                                              |
| 12 |                             |                                                                                                                                                              |
| 13 | Recurrence of cancer (yes/  |                                                                                                                                                              |
| 14 | no)                         | Interview and medical file; only collected in the group with history of cancer                                                                               |
| 15 |                             |                                                                                                                                                              |
| 16 |                             |                                                                                                                                                              |
| 17 | Adverse events (whole       | Interview and medical file; registration of adverse events related to pre-surgical or study-specific investigations: ICG                                     |
| 18 | group) and complications    | fluoroscopy, lymphoscintigraphy, lymph MRI, CT angiography, of complications of reconstructive lymphatic surgery: 1) in                                      |
| 19 | of surgery (in intervention | general blue spot, wound healing problem, infection of wound, decrease of sensibility around wound, erysipelas of limb,                                      |
| 20 | group) (yes/ no)            | deep venous thrombosis, 2) LNT-specific seroma, lymphocele, donor site lymphoedema, loss of flap                                                             |
| 21 |                             |                                                                                                                                                              |
| 22 |                             |                                                                                                                                                              |
| 23 |                             |                                                                                                                                                              |
| 24 |                             |                                                                                                                                                              |
| 25 | Costs related to            | Study-specific questionnaire completed by the compression specialist after delivery of compression material; registration                                    |
| 26 | lymphoedema and its         | of company, compression product, region of compression, type, compression class, cost for health insurance/ patient                                          |
| 27 | treatment (in euro)         | Inter Mutuality Agency (IMA) database (= agency collecting data from different mutual health insurance companies),                                           |
| 28 |                             | based on national number of the study participant                                                                                                            |
| 29 |                             |                                                                                                                                                              |
| 30 |                             |                                                                                                                                                              |
| 31 |                             |                                                                                                                                                              |
| 32 |                             |                                                                                                                                                              |
| 33 | Lymphatic transport         |                                                                                                                                                              |
| 34 |                             |                                                                                                                                                              |
| 35 | ICG fluoroscopy (60 min)    | ICG fluoroscopy; <sup>28</sup> 0.2 ml dilution of ICG/ aqua/ NaCl is injected in 1 <sup>st</sup> and 4 <sup>th</sup> web of affected hand or foot; procedure |
| 36 |                             | consist of 3 minutes of rest, 5 minutes of stimulation and registration of outcomes (=early phase) and a break until 90                                      |
| 37 |                             | minutes post-injection and again registration of outcomes (= late phase); registration of following outcomes: 1) transport                                   |
| 38 |                             |                                                                                                                                                              |
| 39 |                             |                                                                                                                                                              |
| 40 |                             |                                                                                                                                                              |
| 41 |                             |                                                                                                                                                              |
| 42 |                             |                                                                                                                                                              |
| 43 |                             |                                                                                                                                                              |
| 44 |                             |                                                                                                                                                              |
| 45 |                             |                                                                                                                                                              |
| 46 |                             |                                                                                                                                                              |

1  
2  
3  
4  
5  
6  
7  
8  
9  
10  
11  
12  
13  
14  
15  
16  
17  
18  
19  
20  
21  
22  
23  
24  
25  
26  
27  
28  
29  
30  
31  
32  
33  
34  
35  
36  
37  
38  
39  
40  
41  
42  
43  
44  
45  
46

out of injection sites (yes/ no), 2) dermal rerouting (no, splash, stardust and diffuse for predefined regions on arm/ leg), 3) transport out of dermal rerouting, 4) lymph nodes (yes/ no)

Lymphoscintigraphy (60 min)

Lymphoscintigraphy;<sup>29</sup> 55MBq <sup>99m</sup>Tc nanocolloids are injected in 1<sup>st</sup> web of both hands or feet; procedure consist of following steps: 25 minutes of rest, 5 minutes of arm/ leg cycling and acquiring images (= early phase); 60 minutes break; late phase acquisition; following images are made: before and after each step an image of injection sites (outcome: extraction out of injection sites in %), after each step a mini whole body (outcomes: number of lymph nodes, intensity of lymph collectors, intensity of dermal backflow, presence of lymph collaterals), during 25 minutes of rest dynamic images of axilla/ arm or groin/ leg (outcomes: arrival time and uptake in axilla/ inguinal region in %)

---

§ No secondary outcome

### Sample size

The sample size is calculated to have at least 90% power to detect a difference between the intervention group receiving reconstructive surgery and the control group without surgery, on lymphoedema-specific QoL at 18 months, separately within patients with upper limb lymphoedema and within patients with lower limb lymphoedema. Both comparisons are considered as separate trials and therefore alpha has been set equal to 0.05.

The planned analysis to compare the groups is a constrained longitudinal data analysis (cLDA),<sup>30</sup> using the baseline measurement and the follow-up measurements after 1, 3, 6, 12 and 18 months as outcome. The primary analysis refers to the comparison after 18 months (based on a two-sided test with  $\alpha=0.05$ ). The approach is similar in spirit as an analysis of covariance (ANCOVA) but does not exclude subjects with one or more missing measurements. The calculation of the required sample size is based on an approach presented by Stroup.<sup>31</sup> Information with respect to variability of the lymphoedema-specific QoL score and the correlation between the timepoints was obtained from two retrospective series (130 patients with arm oedema and 83 patients with leg oedema).

The following assumptions have been made for the comparison of the lymphoedema-specific QoL:

- Standard deviation (SD) of the lymphoedema-specific QoL equal to 20
- Correlation between the baseline and each of the follow-up measurements equal to 0.50
- Drop-out of 5%, 10%, 15% and 20% after 1 and 3 months, 6 months, 12 months and 18, 24 and 36 months, respectively

To detect a difference of 15 points, which is a clinically important difference,<sup>11 15</sup> 36 subjects are required per group ( $2 \times 2 \times 36 = 144$  subjects in total for the two trials) to have at least 90% power. If the number of subjects would be reached before the end of the planned recruitment period of 24M, recruitment will continue up to 45 subjects per group (180 subjects for the whole study) to obtain more precise information, especially on the set of secondary outcomes. If the number is not attained, the recruitment period will be prolonged.

The sample size estimation heavily depends on estimates of variability of the lymphoedema-specific QoL and the correlation with the baseline measurement. Therefore, after inclusion of 40 subjects per group the already available information will be used to verify if the assumptions were plausible (note however that there will be no information yet at the moment of the primary endpoint). If the observed standard deviation and correlations deviate from the assumed values such that the desired power level of 90% is not guaranteed anymore, an increase of the planned sample size will be considered (if feasible). At the moment of this blinded interim analysis for sample size re-estimation,

1  
2  
3 the assumed dropout rates will also be verified. No interim analyses are planned to stop the study  
4 earlier for efficacy or futility, this to avoid loss of information on the secondary endpoints.  
5  
6  
7  
8

### 9 **Data analyses**

10  
11 Statistical analysis will comply with the Consolidated Standards of Reporting Trials (CONSORT)  
12 guidelines. Analysis will be conducted in a blinded way. The continuous data will be summarised  
13 using mean and SD or median and range values. Different analysis sets will be defined. The intent-to-  
14 treat analysis set (ITT) contains all randomised patients, grouped according to the allocated  
15 treatment. The modified intent-to-treat analysis set (mITT) contains all randomised patients grouped  
16 according to the allocated treatment, but excluding patients who have withdrawn their consent to  
17 the randomised procedure. The as-treated analysis set also contains all randomised patients but  
18 grouping the patients according to their received treatment. The per-protocol analysis set contains  
19 all randomised patients who received the allocated treatment. The main analyses will be performed  
20 on the ITT analysis set. Results on the other analysis sets will be reported additionally.  
21  
22  
23  
24  
25  
26  
27  
28  
29

#### 30 *Primary outcome*

- 31 • Lymphoedema specific QoL

32  
33 A constrained longitudinal data analysis (cLDA)<sup>30</sup> using the baseline measurement and the follow-up  
34 measurements after 1 month, 3 months, 6 months, 12 months and 18 months as outcome will be  
35 used to compare the mean lymphoedema specific QoL after 18 months based on a two-sided test  
36 with  $\alpha=0.05$ . The choice of the covariance structure for the five measurements will be based on  
37 the Aikake criterion. Study site is added as a fixed factor in this model. For patients with a recurrence  
38 of cancer in the root of the limb, only observations before the recurrence are included.  
39

40 Since the analysis is only valid under the missing at random (MAR) assumption (the probability of a  
41 missing lymphoedema-specific QoL measurement does not depend on the unobserved value),  
42 sensitivity analyses will be performed allowing a non-missing at random (NMAR) mechanism. More  
43 specifically, starting from the MAR model, a jump-to-reference (JR) and tipping-point (TP) analysis  
44 will be applied.<sup>32</sup>  
45  
46  
47  
48  
49  
50  
51  
52  
53

#### 54 *Key secondary outcomes*

- 55 • Change of limb volume:

56 For the arm/ hand volume, ratios of the volume of the ipsilateral versus the contralateral side will be  
57 calculated. A multivariate model for the longitudinal measured ratios (7 timepoints) will be used to  
58  
59  
60

1  
2  
3 compare (changes in) log-transformed ratios between both groups. A log transformation for the  
4 ratios is used since intervals between units are not equidistant. For the leg/ foot volume, the same  
5 model will be used but on the original measurements of the (most) affected limb instead of on the  
6 (log-transformed) ratios versus the contralateral side (since also patients with bilateral leg volume  
7 are included).

- Duration of wearing the compression garment:

The same modelling approach will be used as for the primary outcome.

#### *Other secondary outcomes*

Continuous outcomes will be analysed in a similar way as the primary outcome. Categorical (binary) data will be analysed using stratified  $\chi^2$  test and logistic regression models with general estimating equations (GEE) for repeatedly measured binary data. Adverse events and complications after surgery will be reported descriptively.

This study has been designed to permit *economic analysis* in a later phase. If reconstructive surgery is deemed superior to no surgery (i.e. is clinically effective), the next step is to investigate its cost-effectiveness by determining the incremental cost-effectiveness ratio (ICER). To determine the ICER, the costs from a healthcare payer's perspective and from a societal perspective will be considered, as well as the effectiveness by using the EQ-5D-5L questionnaire. If reconstructive surgery is proven cost-effective, the budget impact will be calculated from a reimburse perspective.

#### *Exploratory analyses*

Subgroup analyses for the primary outcome will be considered as a function of stage (stage 1 versus 2a/ 2b), primary vs secondary lymphoedema, weight (normal weight (BMI  $\leq$  25) versus overweight (BMI  $>$  25)) and combination of reconstructive techniques (combination of LVA/ LNT versus only LVA or only LNT)

Moreover, a multivariable model will be constructed to predict the lymphoedema-specific QoL at 36 months based on 14 baseline variables. For subjects with a missing lymphoedema-specific QoL at 36 months, values will be imputed based on a multivariate longitudinal model for the lymphoedema-specific QoL measurements. A model reduction will be performed on a stacked dataset consisting of the multiple imputed data (at least 10 imputations), using a weighting scheme to account for the fraction of missing data in each covariate.<sup>33</sup> Considering the dropouts at 36 months, data for lymphoedema-specific QoL of 144 patients will be available.



## **Data security and management**

A study-specific Data Management Plan has been developed by the data management team. Participant data are stored on a secure database in accordance with the General Data Protection Regulations (2018). Data are de-identified and a unique trial identification number is used on all source documents. These source documents are being checked for completeness and congruity before data entry into REDCap. All trial documentation and data will be archived for at least 20 years after completion of the trial.

A Risk Assessment Plan has also been made with a summary of the concerns in the trial, how they were mitigated, the probability that this will occur and its impact. This finally leads to a risk score (low, medium, high, critical). The concerns with highest risks are discussed during the meeting of the Trial Steering Committee (during recruitment period: once each 6M; thereafter: once a year).

## **Trial monitoring**

A separate Monitoring plan has been constructed and will be conducted periodically by trial monitors (independent from trial staff). The first monitoring visit at each site will be conducted within 4-8 weeks following the baseline visit of the first study subject at that site. Thereafter, monitoring visits will be organized at mean intervals of 6 months during recruitment, and mean intervals of 12 months thereafter. The participating site will provide direct access to the trial data and to the corresponding source data and documents. The trial will be monitored to ensure that it is being conducted in compliance with GCP and current legislation, that written informed consent has been obtained correctly, that the trial procedures have been followed as shown in the protocol, and that the data have been recorded, for which the source data will be compared with the data recorded in REDCap.

## **ETHICS AND DISSEMINATION**

The SurLym trial will be conducted in compliance with the principles of the Declaration of Helsinki, the principles of GCP and in accordance with all applicable regulatory requirements. Approval has been obtained for the study protocol, the informed consent forms and other related documents by the main Ethical Committee of UZ Leuven (S631212) and the local Ethical Committees of UZ Gent and CHU UCL Namur. Any subsequent protocol amendments will be submitted to the Ethical Committee.

1  
2  
3 Furthermore, the study is approved by the Federal Agency for Medicines and Health Products  
4 (EudraCT: 2021-000397-29).  
5  
6  
7  
8

### 9 **Dissemination of results**

10  
11 The results of the study owned by the sponsor shall be disseminated as soon as possible after the  
12 end of the trial, by disclosing them to the public by appropriate means, including publications in  
13 peer-reviewed scientific journals and presentations at congresses and events. Open access will be  
14 ensured to all peer-reviewed scientific publications relating to the results of the study.  
15  
16  
17  
18

### 19 **Acknowledgements**

20  
21 We are grateful to all medical doctors for referring potential participants for inclusion in the trial. We  
22 also want to thank the data management team and the representative of the clinical trial center of  
23 UZ Leuven for their support. Finally, we are thankful to the patients of the advisory board and to the  
24 independent expert for their valuable advises in the preparation phase and during the course of the  
25 trial.  
26  
27  
28  
29  
30  
31  
32

### 33 **Author contributions**

34  
35 ND is the chief investigator of the SurLym trial. TDV is the trial manager. ND, CR, TD are the principle  
36 investigators of the 3 study sites. SF is the statistician. LG is expert in occupational medicine and will  
37 supervise the economic analysis (if executed). ND, AKH, ST, BBH, IF, VVB, TDC, MDS, CR, CM, JF, TD  
38 will perform the recruitment of patients. ST, KS, PF, MS, AB, BDP, LD will perform the surgical  
39 procedures and follow-up. AKH, JF, VVB, TDC, MDS are responsible for the clinical assessments  
40 (including lymphofluoroscopy and lymphoscintigraphy). GM, FK, AF, DD are the radiologists  
41 responsible for the lymph MRI an BK is a nuclear medicine physician responsible for the  
42 lymphoscintigraphy. JM, SS, GP, KVL are the independent experts in reconstructive lymphatic surgery  
43 and will verify the quality of the surgical procedures. ND drafted the manuscript. All authors  
44 contributed to the establishment of the protocol, revised the manuscript and provided input  
45 according to their area of expertise.  
46  
47  
48  
49  
50  
51  
52  
53  
54  
55  
56  
57  
58

### 59 **Funding statement**

1  
2  
3 This study (KCE19-1245) is an independent research study funded by the Belgian Health Care  
4 Knowledge Centre under the KCE Trials Programme. The views expressed in this publication are  
5 those of the author(s) and not necessarily those of Belgian Health Care Knowledge Centre.  
6  
7  
8  
9

#### 10 11 **Data statement**

12  
13 Data will be available on reasonable request.  
14  
15

#### 16 17 18 **Competing interests**

19  
20 None declared  
21  
22  
23

#### 24 25 **Ethics approval**

26  
27 Approval is obtained by the central Ethical Committee of the University Hospitals Leuven (S63212)  
28 and by the local Ethical Committees of UZ Gent (BC-09711) and CHU UCL Namur (43/2021).  
29  
30  
31  
32  
33  
34  
35  
36  
37  
38

#### 39 **References**

- 40  
41 1. Fu MR, Ridner SH, Hu SH, et al. Psychosocial impact of lymphedema: a systematic review of  
42 literature from 2004 to 2011. *Psychooncology* 2013;22(7):1466-84. doi: 10.1002/pon.3201  
43  
44 2. Mercier G, Pastor J, Moffatt C, et al. LIMPRINT: Health-Related Quality of Life in Adult Patients with  
45 Chronic Edema. *Lymphat Res Biol* 2019;17(2):163-67. doi: 10.1089/lrb.2018.0084 [published  
46 Online First: 2019/04/18]  
47  
48 3. Neubauer M, Schoberwalter D, Cenik F, et al. Lymphedema and employability - Review and results  
49 of a survey of Austrian experts. *Wien Klin Wochenschr* 2017;129(5-6):186-91. doi:  
50 10.1007/s00508-017-1167-1 [published Online First: 2017/01/28]  
51  
52 4. Damstra RJ, Halk AB. The Dutch lymphedema guidelines based on the International Classification  
53 of Functioning, Disability, and Health and the chronic care model. *J Vasc Surg Venous*  
54 *Lymphat Disord* 2017;5(5):756-65. doi: 10.1016/j.jvsv.2017.04.012 [published Online First:  
55 2017/08/19]  
56  
57  
58  
59  
60

- 1  
2  
3 5. Executive Committee of the International Society of L. The diagnosis and treatment of peripheral  
4 lymphedema: 2020 Consensus Document of the International Society of Lymphology.  
5 *Lymphology* 2020;53(1):3-19. [published Online First: 2020/06/11]  
6  
7
- 8 6. Kung TA, Champaneria MC, Maki JH, et al. Current Concepts in the Surgical Management of  
9 Lymphedema. *Plast Reconstr Surg* 2017;139(4):1003e-13e. doi:  
10 10.1097/prs.0000000000003218 [published Online First: 2017/03/30]  
11  
12
- 13 7. Chang DW, Masia J, Garza R, 3rd, et al. Lymphedema: Surgical and Medical Therapy. *Plast Reconstr*  
14 *Surg* 2016;138(3 Suppl):209s-18s. doi: 10.1097/prs.0000000000002683 [published Online  
15 First: 2016/08/25]  
16  
17
- 18 8. Gould DJ, Mehrara BJ, Neligan P, et al. Lymph node transplantation for the treatment of  
19 lymphedema. *J Surg Oncol* 2018;118(5):736-42. doi: 10.1002/jso.25180 [published Online  
20 First: 2018/08/22]  
21  
22
- 23 9. Markkula SP, Leung N, Allen VB, et al. Surgical interventions for the prevention or treatment of  
24 lymphoedema after breast cancer treatment. *Cochrane Database Syst Rev* 2019;2:CD011433.  
25 doi: 10.1002/14651858.CD011433.pub2 [published Online First: 2019/02/20]  
26  
27
- 28 10. Dionyssiou D, Demiri E, Tsimponis A, et al. A randomized control study of treating secondary  
29 stage II breast cancer-related lymphoedema with free lymph node transfer. *Breast Cancer*  
30 *Res Treat* 2016;156(1):73-9. doi: 10.1007/s10549-016-3716-0 [published Online First:  
31 2016/02/20]  
32  
33
- 34 11. De Vrieze T, Vos L, Gebruers N, et al. Revision of the Lymphedema Functioning, Disability and  
35 Health Questionnaire for Upper Limb Lymphedema (Lymph-ICF-UL): Reliability and Validity.  
36 *Lymphat Res Biol* 2019;17(3):347-55. doi: 10.1089/lrb.2018.0025 [published Online First:  
37 2019/02/14]  
38  
39
- 40 12. Devoogdt N, Lemkens H, Geraerts I, et al. A new device to measure upper limb circumferences:  
41 reliability and validity. *Int Angiol* 2010;(in publication)  
42  
43
- 44 13. Chang DW, Dayan J, Greene AK, et al. Surgical Treatment of Lymphedema: A Systematic Review  
45 and Meta-Analysis of Controlled Trials. Results of a Consensus Conference. *Plast Reconstr*  
46 *Surg* 2021;147(4):975-93. doi: 10.1097/PRS.0000000000007783  
47  
48
- 49 14. De Vrieze T, Gebruers N, Nevelsteen I, et al. Responsiveness of the Lymphedema Functioning,  
50 Disability, and Health Questionnaire for Upper Limb Lymphedema in Patients with Breast  
51 Cancer-Related Lymphedema. *Lymphat Res Biol* 2020 doi: 10.1089/lrb.2019.0073 [published  
52 Online First: 2020/01/24]  
53  
54
- 55 15. Devoogdt N, De Groef A, Hendrickx A, et al. Lymphedema Functioning, Disability and Health  
56 Questionnaire for Lower Limb Lymphedema (Lymph-ICF-LL): Reliability and Validity. *Physical*  
57 *therapy* 2014 doi: 10.2522/ptj.20130285 [published Online First: 2014/01/15]  
58  
59  
60

16. Devoogdt N, Van Kampen M, Geraerts I, et al. Lymphoedema Functioning, Disability and Health questionnaire (Lymph-ICF): reliability and validity. *Phys Ther* 2011;91(6):944-57. doi: 10.2522/ptj.20100087 [published Online First: 2011/04/16]
17. Bjelland I, Dahl AA, Haug TT, et al. The validity of the Hospital Anxiety and Depression Scale. An updated literature review. *J Psychosom Res* 2002;52(2):69-77. [published Online First: 2002/02/08]
18. De Vrieze T, Fripiat J, Deltombe T, et al. Cross-cultural validation of the French version of the Lymphedema Functioning, Disability and Health Questionnaire for Upper Limb Lymphedema (Lymph-ICF-UL). *Disabil Rehabil* 2020:1-8. doi: 10.1080/09638288.2020.1716271 [published Online First: 2020/01/29]
19. Devoogdt N, Partsch H, Heroes AKH, et al. The ICC Compression Questionnaire: a comprehensive tool to evaluate compression materials or devices applied in subjects with lymphoedema or chronic venous disease. *Submitted to Angiology* 2019
20. EuroQol--a new facility for the measurement of health-related quality of life. *Health Policy* 1990;16(3):199-208. [published Online First: 1990/11/05]
21. Goorts K, Vandebroek S, Vander Elst T, et al. Quicksan assesses risk factors of long-term sickness absence: A cross-sectional (factorial) construct validation study. *PloS one* 2019;14(1):e0210359. doi: 10.1371/journal.pone.0210359 [published Online First: 20190111]
22. Ainsworth BE, Macera CA, Jones DA, et al. Comparison of the 2001 BRFSS and the IPAQ Physical Activity Questionnaires. *Med Sci Sports Exerc* 2006;38(9):1584-92. doi: 10.1249/01.mss.0000229457.73333.9a [published Online First: 2006/09/09]
23. De Vrieze T, Vos L, Gebruers N, et al. Protocol of a randomised controlled trial regarding the effectiveness of fluoroscopy-guided manual lymph drainage for the treatment of breast cancer-related lymphoedema (EforT-BCRL trial). *Eur J Obstet Gynecol Reprod Biol* 2018;221:177-88. doi: 10.1016/j.ejogrb.2017.12.023 [published Online First: 2017/12/27]
24. De Vrieze T, Gebruers N, Tjalma WA, et al. What is the best method to determine excessive arm volume in patients with breast cancer-related lymphoedema in clinical practice? Reliability, time efficiency and clinical feasibility of five different methods. *Clin Rehabil* 2019;33(7):1221-32. doi: 10.1177/0269215519835907 [published Online First: 2019/03/19]
25. Devoogdt N, Cavaggion C, Van der Gucht E, et al. Reliability, Validity, and Feasibility of Water Displacement Method, Figure-of-Eight Method, and Circumference Measurements in Determination of Ankle and Foot Edema. *Lymphat Res Biol* 2019;17(5):531-36. doi: 10.1089/lrb.2018.0045 [published Online First: 2019/01/17]

- 1  
2  
3 26. Hidding JT, Viehoff PB, Beurskens CH, et al. Measurement Properties of Instruments for  
4 Measuring of Lymphedema: Systematic Review. *Phys Ther* 2016;96(12):1965-81. doi:  
5 10.2522/ptj.20150412  
6  
7  
8 27. Farrell K, Johnson A, Duncan H, et al. The intertester and intratester reliability of hand  
9 volumetrics. *J Hand Ther* 2003;16(4):292-9. [published Online First: 2003/11/08]  
10  
11 28. Thomis S, Dams L, Fourneau I, et al. Correlation Between Clinical Assessment and  
12 Lymphofluoroscopy in Patients with Breast Cancer-Related Lymphedema: A Study of  
13 Concurrent Validity. *Lymphat Res Biol* 2020 doi: 10.1089/lrb.2019.0090 [published Online  
14 First: 2020/03/27]  
15  
16  
17 29. Devoogdt N, Van den Wyngaert T, Bourgeois P, et al. Reproducibility of lymphoscintigraphic  
18 evaluation of the upper limb. *Lymphat Res Biol* 2014;12(3):175-84. doi:  
19 10.1089/lrb.2013.0034  
20  
21  
22 30. Liang KY, Zeger S. Longitudinal data analysis of continuous and discrete responses for pre-post  
23 designs. *Sankhya: The Indian Journal of Statistics* 2000;Series B 62:134-48.  
24  
25  
26 31. Stroup WW. Mixed model procedures to assess power, precision, and sample size in the design of  
27 experiments. : Proc. Biopharmaceutical Section. Am. Stat. Assoc. 1999:15-24  
28  
29  
30 32. Carton A, Pickery J, Verlet D, eds. Analyse en sensitiviteitsanalyse van onvolledige gegevens.  
31 Symposium: twintig jaar peilen in Vlaanderen; 2016.  
32  
33 33. Wood AM, White IR, Royston P. How should variable selection be performed with multiply  
34 imputed data? *Stat Med* 2008;27:3227-46.  
35  
36  
37  
38  
39  
40  
41  
42  
43  
44  
45  
46  
47  
48  
49  
50  
51  
52  
53  
54  
55  
56  
57  
58  
59  
60

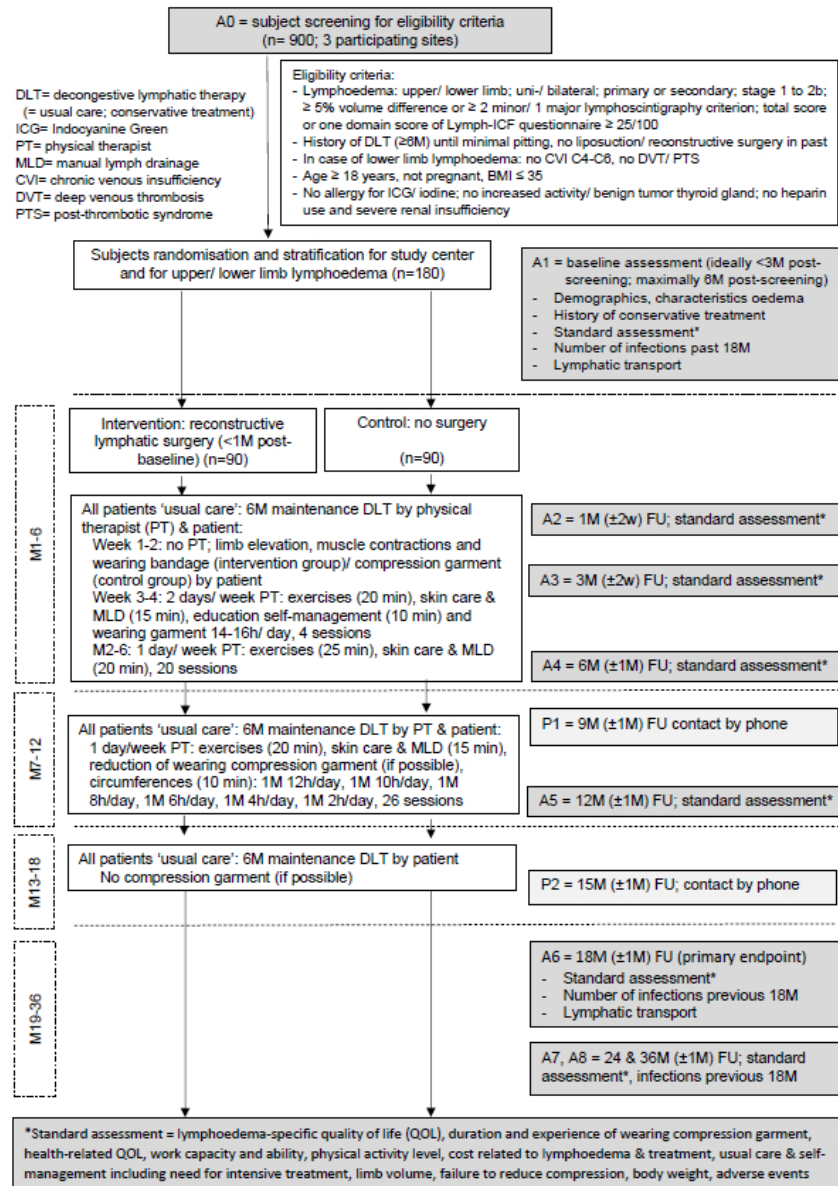

Figure 1. Flow diagram of SurLym trial

321x456mm (47 x 47 DPI)

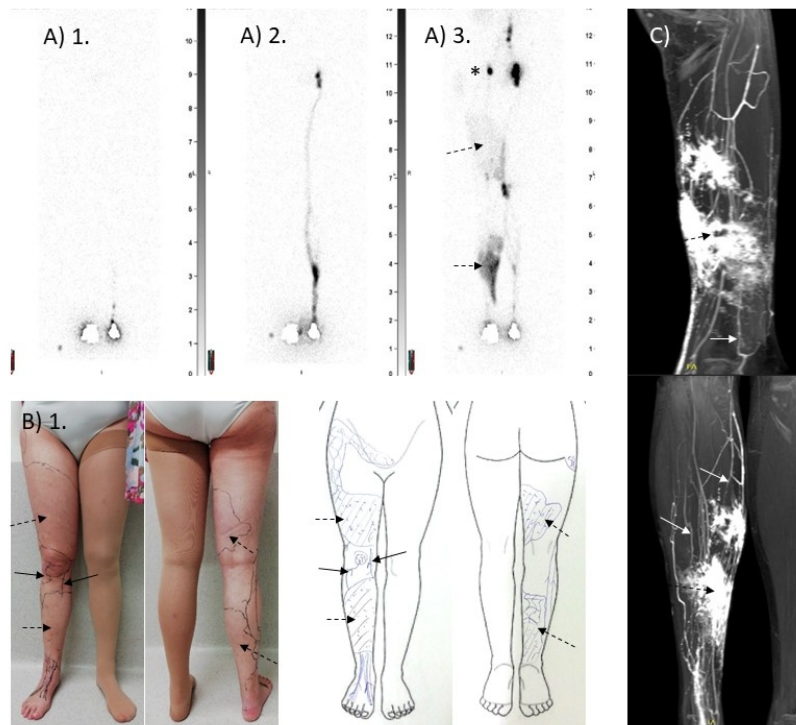

Figure 2 Woman, 57 years old, secondary lymphoedema right leg (> left leg) and midline, developed after inguinal and pelvic lymph node dissection and radio-chemotherapy for vulvar cancer; Preoperative investigations: A) lymphoscintigraphy in 3 phases: 1. early phase after rest, 2. early phase after activity (cycling), 3. late phase after activity (walking); demonstrating dermal backflow at lower and upper leg (dotted arrow) and a lymph node in the groin (\*); B) ICG lymphofluoroscopy; 1. Picture of limb with markings of the superficial lymphatic architecture; 2. Body diagram; demonstrating dermal backflow (dotted arrow) and two useful lymph collectors at the level of the knee (full arrow), c) lymph MRI; confirming the presence of two useful lymph collectors (full arrow); Based on preoperative investigations, choice of reconstructive lymphatic surgery: LVA at the level of the knee; no LNT because of pelvic lymph node dissection and activity (working lymph node) in the groin.

254x190mm (96 x 96 DPI)



# Reporting checklist for protocol of a clinical trial.

Based on the SPIRIT guidelines.

## Instructions to authors

Complete this checklist by entering the page numbers from your manuscript where readers will find each of the items listed below.

Your article may not currently address all the items on the checklist. Please modify your text to include the missing information. If you are certain that an item does not apply, please write "n/a" and provide a short explanation.

Upload your completed checklist as an extra file when you submit to a journal.

In your methods section, say that you used the SPIRIT reporting guidelines, and cite them as:

Chan A-W, Tetzlaff JM, Gøtzsche PC, Altman DG, Mann H, Berlin J, Dickersin K, Hróbjartsson A, Schulz KF, Parulekar WR, Krleža-Jerić K, Laupacis A, Moher D. SPIRIT 2013 Explanation and Elaboration: Guidance for protocols of clinical trials. BMJ. 2013;346:e7586

Reporting Item

Page Number

### Administrative information

|       |                    |                                                                                                              |          |
|-------|--------------------|--------------------------------------------------------------------------------------------------------------|----------|
| Title | <a href="#">#1</a> | Descriptive title identifying the study design, population, interventions, and, if applicable, trial acronym | Paper p1 |
|-------|--------------------|--------------------------------------------------------------------------------------------------------------|----------|

|    |                              |                     |                                                                          |                  |
|----|------------------------------|---------------------|--------------------------------------------------------------------------|------------------|
| 1  | Trial registration           | <a href="#">#2a</a> | Trial identifier and registry name. If not yet registered, name of       | Paper p3         |
| 2  |                              |                     | intended registry                                                        |                  |
| 3  |                              |                     |                                                                          |                  |
| 4  |                              |                     |                                                                          |                  |
| 5  |                              |                     |                                                                          |                  |
| 6  | Trial registration: data set | <a href="#">#2b</a> | All items from the World Health Organization Trial Registration Data     | Paper p3         |
| 7  |                              |                     | Set                                                                      |                  |
| 8  |                              |                     |                                                                          |                  |
| 9  |                              |                     |                                                                          |                  |
| 10 |                              |                     |                                                                          |                  |
| 11 | Protocol version             | <a href="#">#3</a>  | Date and version identifier                                              | Paper p3         |
| 12 |                              |                     |                                                                          |                  |
| 13 |                              |                     |                                                                          |                  |
| 14 |                              |                     |                                                                          |                  |
| 15 | Funding                      | <a href="#">#4</a>  | Sources and types of financial, material, and other support              | Paper p3, study  |
| 16 |                              |                     |                                                                          | agreement KCE-UZ |
| 17 |                              |                     |                                                                          | Leuven           |
| 18 |                              |                     |                                                                          |                  |
| 19 |                              |                     |                                                                          |                  |
| 20 |                              |                     |                                                                          |                  |
| 21 |                              |                     |                                                                          |                  |
| 22 | Roles and responsibilities:  | <a href="#">#5a</a> | Names, affiliations, and roles of protocol contributors                  | Paper p30        |
| 23 | contributorship              |                     |                                                                          |                  |
| 24 |                              |                     |                                                                          |                  |
| 25 |                              |                     |                                                                          |                  |
| 26 |                              |                     |                                                                          |                  |
| 27 |                              |                     |                                                                          |                  |
| 28 | Roles and responsibilities:  | <a href="#">#5b</a> | Name and contact information for the trial sponsor                       | Paper p3         |
| 29 | sponsor contact              |                     |                                                                          |                  |
| 30 |                              |                     |                                                                          |                  |
| 31 |                              |                     |                                                                          |                  |
| 32 | information                  |                     |                                                                          |                  |
| 33 |                              |                     |                                                                          |                  |
| 34 |                              |                     |                                                                          |                  |
| 35 |                              |                     |                                                                          |                  |
| 36 | Roles and responsibilities:  | <a href="#">#5c</a> | Role of study sponsor and funders, if any, in study design; collection,  | Protocol v3.0 p9 |
| 37 | sponsor and funder           |                     | management, analysis, and interpretation of data; writing of the         |                  |
| 38 |                              |                     | report; and the decision to submit the report for publication, including |                  |
| 39 |                              |                     | whether they will have ultimate authority over any of these activities   |                  |
| 40 |                              |                     |                                                                          |                  |
| 41 |                              |                     |                                                                          |                  |
| 42 |                              |                     |                                                                          |                  |
| 43 |                              |                     |                                                                          |                  |
| 44 |                              |                     |                                                                          |                  |
| 45 |                              |                     |                                                                          |                  |
| 46 |                              |                     |                                                                          |                  |
| 47 |                              |                     |                                                                          |                  |

1 Roles and responsibilities: [#5d](#) Composition, roles, and responsibilities of the coordinating centre, Protocol v3.0 p10  
 2 committees  
 3 steering committee, endpoint adjudication committee, data  
 4 management team, and other individuals or groups overseeing the  
 5 trial, if applicable (see Item 21a for data monitoring committee)  
 6  
 7  
 8  
 9

10 **Introduction**

11  
 12  
 13  
 14 Background and rationale [#6a](#) Description of research question and justification for undertaking the Paper p7  
 15 trial, including summary of relevant studies (published and  
 16 unpublished) examining benefits and harms for each intervention  
 17  
 18  
 19  
 20

21  
 22 Background and rationale: [#6b](#) Explanation for choice of comparators Paper p6  
 23 choice of comparators  
 24  
 25

26  
 27 Objectives [#7](#) Specific objectives or hypotheses Paper p7  
 28  
 29

30 Trial design [#8](#) Description of trial design including type of trial (eg, parallel group, Paper p9  
 31 crossover, factorial, single group), allocation ratio, and framework  
 32 (eg, superiority, equivalence, non-inferiority, exploratory)  
 33  
 34  
 35  
 36  
 37

38 **Methods: Participants,**  
 39 **interventions, and**  
 40 **outcomes**  
 41  
 42  
 43

|    |                            |                      |                                                                           |                          |
|----|----------------------------|----------------------|---------------------------------------------------------------------------|--------------------------|
| 1  | Study setting              | <a href="#">#9</a>   | Description of study settings (eg, community clinic, academic             | Paper p9                 |
| 2  |                            |                      | hospital) and list of countries where data will be collected. Reference   |                          |
| 3  |                            |                      | to where list of study sites can be obtained                              |                          |
| 4  |                            |                      |                                                                           |                          |
| 5  |                            |                      |                                                                           |                          |
| 6  |                            |                      |                                                                           |                          |
| 7  |                            |                      |                                                                           |                          |
| 8  | Eligibility criteria       | <a href="#">#10</a>  | Inclusion and exclusion criteria for participants. If applicable,         | Paper p10-11             |
| 9  |                            |                      | eligibility criteria for study centres and individuals who will perform   |                          |
| 10 |                            |                      | the interventions (eg, surgeons, psychotherapists)                        |                          |
| 11 |                            |                      |                                                                           |                          |
| 12 |                            |                      |                                                                           |                          |
| 13 |                            |                      |                                                                           |                          |
| 14 |                            |                      |                                                                           |                          |
| 15 |                            |                      |                                                                           |                          |
| 16 | Interventions: description | <a href="#">#11a</a> | Interventions for each group with sufficient detail to allow replication, | Paper p13-18             |
| 17 |                            |                      | including how and when they will be administered                          |                          |
| 18 |                            |                      |                                                                           |                          |
| 19 |                            |                      |                                                                           |                          |
| 20 |                            |                      |                                                                           |                          |
| 21 |                            |                      |                                                                           |                          |
| 22 | Interventions:             | <a href="#">#11b</a> | Criteria for discontinuing or modifying allocated interventions for a     | Paper p13                |
| 23 | modifications              |                      | given trial participant (eg, drug dose change in response to harms,       |                          |
| 24 |                            |                      | participant request, or improving / worsening disease)                    |                          |
| 25 |                            |                      |                                                                           |                          |
| 26 |                            |                      |                                                                           |                          |
| 27 |                            |                      |                                                                           |                          |
| 28 |                            |                      |                                                                           |                          |
| 29 | Interventions: adherence   | <a href="#">#11c</a> | Strategies to improve adherence to intervention protocols, and any        | Paper p19, Protocol v3.0 |
| 30 |                            |                      | procedures for monitoring adherence (eg, drug tablet return;              | p44                      |
| 31 |                            |                      | laboratory tests)                                                         |                          |
| 32 |                            |                      |                                                                           |                          |
| 33 |                            |                      |                                                                           |                          |
| 34 |                            |                      |                                                                           |                          |
| 35 |                            |                      |                                                                           |                          |
| 36 |                            |                      |                                                                           |                          |
| 37 | Interventions: concomitant | <a href="#">#11d</a> | Relevant concomitant care and interventions that are permitted or         | Paper p18                |
| 38 | care                       |                      | prohibited during the trial                                               |                          |
| 39 |                            |                      |                                                                           |                          |
| 40 |                            |                      |                                                                           |                          |
| 41 |                            |                      |                                                                           |                          |
| 42 |                            |                      |                                                                           |                          |
| 43 |                            |                      |                                                                           |                          |
| 44 |                            |                      |                                                                           |                          |
| 45 |                            |                      |                                                                           |                          |
| 46 |                            |                      |                                                                           |                          |
| 47 |                            |                      |                                                                           |                          |

|    |                               |                     |                                                                       |               |
|----|-------------------------------|---------------------|-----------------------------------------------------------------------|---------------|
| 1  | Outcomes                      | <a href="#">#12</a> | Primary, secondary, and other outcomes, including the specific        | Paper p19-25  |
| 2  |                               |                     | measurement variable (eg, systolic blood pressure), analysis metric   |               |
| 3  |                               |                     | (eg, change from baseline, final value, time to event), method of     |               |
| 4  |                               |                     | aggregation (eg, median, proportion), and time point for each         |               |
| 5  |                               |                     | outcome. Explanation of the clinical relevance of chosen efficacy and |               |
| 6  |                               |                     | harm outcomes is strongly recommended                                 |               |
| 7  |                               |                     |                                                                       |               |
| 8  |                               |                     |                                                                       |               |
| 9  |                               |                     |                                                                       |               |
| 10 |                               |                     |                                                                       |               |
| 11 |                               |                     |                                                                       |               |
| 12 |                               |                     |                                                                       |               |
| 13 |                               |                     |                                                                       |               |
| 14 |                               |                     |                                                                       |               |
| 15 |                               |                     |                                                                       |               |
| 16 | Participant timeline          | <a href="#">#13</a> | Time schedule of enrolment, interventions (including any run-ins and  | Paper figure1 |
| 17 |                               |                     | washouts), assessments, and visits for participants. A schematic      |               |
| 18 |                               |                     | diagram is highly recommended (see Figure)                            |               |
| 19 |                               |                     |                                                                       |               |
| 20 |                               |                     |                                                                       |               |
| 21 |                               |                     |                                                                       |               |
| 22 |                               |                     |                                                                       |               |
| 23 | Sample size                   | <a href="#">#14</a> | Estimated number of participants needed to achieve study objectives   | Paper p26     |
| 24 |                               |                     | and how it was determined, including clinical and statistical         |               |
| 25 |                               |                     | assumptions supporting any sample size calculations                   |               |
| 26 |                               |                     |                                                                       |               |
| 27 |                               |                     |                                                                       |               |
| 28 |                               |                     |                                                                       |               |
| 29 |                               |                     |                                                                       |               |
| 30 |                               |                     |                                                                       |               |
| 31 | Recruitment                   | <a href="#">#15</a> | Strategies for achieving adequate participant enrolment to reach      | Paper p11-12  |
| 32 |                               |                     | target sample size                                                    |               |
| 33 |                               |                     |                                                                       |               |
| 34 |                               |                     |                                                                       |               |
| 35 |                               |                     |                                                                       |               |
| 36 | <b>Methods: Assignment of</b> |                     |                                                                       |               |
| 37 | <b>interventions (for</b>     |                     |                                                                       |               |
| 38 | <b>controlled trials)</b>     |                     |                                                                       |               |
| 39 |                               |                     |                                                                       |               |
| 40 |                               |                     |                                                                       |               |
| 41 |                               |                     |                                                                       |               |
| 42 |                               |                     |                                                                       |               |
| 43 |                               |                     |                                                                       |               |
| 44 |                               |                     |                                                                       |               |
| 45 |                               |                     |                                                                       |               |
| 46 |                               |                     |                                                                       |               |
| 47 |                               |                     |                                                                       |               |

|    |                            |                      |                                                                        |                  |
|----|----------------------------|----------------------|------------------------------------------------------------------------|------------------|
| 1  | Allocation: sequence       | <a href="#">#16a</a> | Method of generating the allocation sequence (eg, computer-            | Paper p12        |
| 2  |                            |                      | generated random numbers), and list of any factors for stratification. |                  |
| 3  | generation                 |                      | To reduce predictability of a random sequence, details of any          |                  |
| 4  |                            |                      | planned restriction (eg, blocking) should be provided in a separate    |                  |
| 5  |                            |                      | document that is unavailable to those who enrol participants or        |                  |
| 6  |                            |                      | assign interventions                                                   |                  |
| 7  |                            |                      |                                                                        |                  |
| 8  | Allocation concealment     | <a href="#">#16b</a> | Mechanism of implementing the allocation sequence (eg, central         | Paper p12        |
| 9  | mechanism                  |                      | telephone; sequentially numbered, opaque, sealed envelopes),           |                  |
| 10 |                            |                      | describing any steps to conceal the sequence until interventions are   |                  |
| 11 |                            |                      | assigned                                                               |                  |
| 12 |                            |                      |                                                                        |                  |
| 13 | Allocation: implementation | <a href="#">#16c</a> | Who will generate the allocation sequence, who will enrol              | Paper p12        |
| 14 |                            |                      | participants, and who will assign participants to interventions        |                  |
| 15 |                            |                      |                                                                        |                  |
| 16 | Blinding (masking)         | <a href="#">#17a</a> | Who will be blinded after assignment to interventions (eg, trial       | Paper p12        |
| 17 |                            |                      | participants, care providers, outcome assessors, data analysts), and   |                  |
| 18 |                            |                      | how                                                                    |                  |
| 19 |                            |                      |                                                                        |                  |
| 20 | Blinding (masking):        | <a href="#">#17b</a> | If blinded, circumstances under which unblinding is permissible, and   | N/A, no blinding |
| 21 | emergency unblinding       |                      | procedure for revealing a participant's allocated intervention during  |                  |
| 22 |                            |                      | the trial                                                              |                  |
| 23 |                            |                      |                                                                        |                  |

1 **Methods: Data collection,**  
 2  
 3 **management, and analysis**  
 4

|                                                                                         |                                    |                      |                                                                                                                                                                                                                                                                                                                                                                                                              |                                         |
|-----------------------------------------------------------------------------------------|------------------------------------|----------------------|--------------------------------------------------------------------------------------------------------------------------------------------------------------------------------------------------------------------------------------------------------------------------------------------------------------------------------------------------------------------------------------------------------------|-----------------------------------------|
| 5<br>6<br>7<br>8<br>9<br>10<br>11<br>12<br>13<br>14<br>15<br>16<br>17<br>18<br>19<br>20 | Data collection plan               | <a href="#">#18a</a> | Plans for assessment and collection of outcome, baseline, and other trial data, including any related processes to promote data quality (eg, duplicate measurements, training of assessors) and a description of study instruments (eg, questionnaires, laboratory tests) along with their reliability and validity, if known. Reference to where data collection forms can be found, if not in the protocol | Data management plan v2.0               |
| 21<br>22<br>23<br>24<br>25<br>26<br>27<br>28                                            | Data collection plan:<br>retention | <a href="#">#18b</a> | Plans to promote participant retention and complete follow-up, including list of any outcome data to be collected for participants who discontinue or deviate from intervention protocols                                                                                                                                                                                                                    | Paper p29, Risk assessment plan v1 p8-9 |
| 29<br>30<br>31<br>32<br>33<br>34<br>35<br>36<br>37                                      | Data management                    | <a href="#">#19</a>  | Plans for data entry, coding, security, and storage, including any related processes to promote data quality (eg, double data entry; range checks for data values). Reference to where details of data management procedures can be found, if not in the protocol                                                                                                                                            | Data management plan v2.0               |
| 38<br>39<br>40<br>41<br>42<br>43<br>44                                                  | Statistics: outcomes               | <a href="#">#20a</a> | Statistical methods for analysing primary and secondary outcomes. Reference to where other details of the statistical analysis plan can be found, if not in the protocol                                                                                                                                                                                                                                     | Paper p27-28                            |

|    |                            |                      |                                                                      |                       |
|----|----------------------------|----------------------|----------------------------------------------------------------------|-----------------------|
| 1  | Statistics: additional     | <a href="#">#20b</a> | Methods for any additional analyses (eg, subgroup and adjusted       | Paper p27-28          |
| 2  |                            |                      |                                                                      |                       |
| 3  | analyses                   |                      | analyses)                                                            |                       |
| 4  |                            |                      |                                                                      |                       |
| 5  |                            |                      |                                                                      |                       |
| 6  | Statistics: analysis       | <a href="#">#20c</a> | Definition of analysis population relating to protocol non-adherence | Paper p27             |
| 7  |                            |                      |                                                                      |                       |
| 8  | population and missing     |                      | (eg, as randomised analysis), and any statistical methods to handle  |                       |
| 9  |                            |                      |                                                                      |                       |
| 10 | data                       |                      | missing data (eg, multiple imputation)                               |                       |
| 11 |                            |                      |                                                                      |                       |
| 12 |                            |                      |                                                                      |                       |
| 13 |                            |                      |                                                                      |                       |
| 14 | <b>Methods: Monitoring</b> |                      |                                                                      |                       |
| 15 |                            |                      |                                                                      |                       |
| 16 |                            |                      |                                                                      |                       |
| 17 | Data monitoring: formal    | <a href="#">#21a</a> | Composition of data monitoring committee (DMC); summary of its       | Paper p29             |
| 18 |                            |                      |                                                                      |                       |
| 19 | committee                  |                      | role and reporting structure; statement of whether it is independent |                       |
| 20 |                            |                      |                                                                      |                       |
| 21 |                            |                      |                                                                      |                       |
| 22 |                            |                      |                                                                      |                       |
| 23 |                            |                      |                                                                      |                       |
| 24 |                            |                      |                                                                      |                       |
| 25 |                            |                      |                                                                      |                       |
| 26 |                            |                      |                                                                      |                       |
| 27 |                            |                      |                                                                      |                       |
| 28 |                            |                      |                                                                      |                       |
| 29 | Data monitoring: interim   | <a href="#">#21b</a> | Description of any interim analyses and stopping guidelines,         | Paper p26             |
| 30 |                            |                      |                                                                      |                       |
| 31 | analysis                   |                      | including who will have access to these interim results and make the |                       |
| 32 |                            |                      |                                                                      |                       |
| 33 |                            |                      |                                                                      |                       |
| 34 |                            |                      |                                                                      |                       |
| 35 |                            |                      |                                                                      |                       |
| 36 |                            |                      |                                                                      |                       |
| 37 | Harms                      | <a href="#">#22</a>  | Plans for collecting, assessing, reporting, and managing solicited   | Protocol v3.0 p46-47; |
| 38 |                            |                      |                                                                      |                       |
| 39 |                            |                      |                                                                      |                       |
| 40 |                            |                      |                                                                      |                       |
| 41 |                            |                      |                                                                      |                       |
| 42 |                            |                      |                                                                      |                       |
| 43 |                            |                      |                                                                      |                       |
| 44 |                            |                      |                                                                      |                       |
| 45 |                            |                      |                                                                      |                       |
| 46 |                            |                      |                                                                      |                       |
| 47 |                            |                      |                                                                      |                       |



|    |                                 |                      |                                                                          |                        |
|----|---------------------------------|----------------------|--------------------------------------------------------------------------|------------------------|
| 1  | Auditing                        | <a href="#">#23</a>  | Frequency and procedures for auditing trial conduct, if any, and         | Paper p29              |
| 2  |                                 |                      | whether the process will be independent from investigators and the       |                        |
| 3  |                                 |                      | sponsor                                                                  |                        |
| 4  |                                 |                      |                                                                          |                        |
| 5  |                                 |                      |                                                                          |                        |
| 6  |                                 |                      |                                                                          |                        |
| 7  |                                 |                      |                                                                          |                        |
| 8  |                                 |                      |                                                                          |                        |
| 9  | <b>Ethics and dissemination</b> |                      |                                                                          |                        |
| 10 |                                 |                      |                                                                          |                        |
| 11 |                                 |                      |                                                                          |                        |
| 12 | Research ethics approval        | <a href="#">#24</a>  | Plans for seeking research ethics committee / institutional review       | Protocol v3.0 p57      |
| 13 |                                 |                      | board (REC / IRB) approval                                               |                        |
| 14 |                                 |                      |                                                                          |                        |
| 15 |                                 |                      |                                                                          |                        |
| 16 |                                 |                      |                                                                          |                        |
| 17 | Protocol amendments             | <a href="#">#25</a>  | Plans for communicating important protocol modifications (eg,            | Protocol v3.0 p57      |
| 18 |                                 |                      | changes to eligibility criteria, outcomes, analyses) to relevant parties |                        |
| 19 |                                 |                      | (eg, investigators, REC / IRBs, trial participants, trial registries,    |                        |
| 20 |                                 |                      | journals, regulators)                                                    |                        |
| 21 |                                 |                      |                                                                          |                        |
| 22 |                                 |                      |                                                                          |                        |
| 23 |                                 |                      |                                                                          |                        |
| 24 |                                 |                      |                                                                          |                        |
| 25 |                                 |                      |                                                                          |                        |
| 26 |                                 |                      |                                                                          |                        |
| 27 | Consent or assent               | <a href="#">#26a</a> | Who will obtain informed consent or assent from potential trial          | Paper p11-12, Protocol |
| 28 |                                 |                      | participants or authorised surrogates, and how (see Item 32)             | v3.0 p33               |
| 29 |                                 |                      |                                                                          |                        |
| 30 |                                 |                      |                                                                          |                        |
| 31 |                                 |                      |                                                                          |                        |
| 32 | Consent or assent:              | <a href="#">#26b</a> | Additional consent provisions for collection and use of participant      | N/A                    |
| 33 | ancillary studies               |                      | data and biological specimens in ancillary studies, if applicable        |                        |
| 34 |                                 |                      |                                                                          |                        |
| 35 |                                 |                      |                                                                          |                        |
| 36 |                                 |                      |                                                                          |                        |
| 37 |                                 |                      |                                                                          |                        |
| 38 | Confidentiality                 | <a href="#">#27</a>  | How personal information about potential and enrolled participants       | Paper p29, Data        |
| 39 |                                 |                      | will be collected, shared, and maintained in order to protect            | Management Plan p6-7   |
| 40 |                                 |                      | confidentiality before, during, and after the trial                      |                        |
| 41 |                                 |                      |                                                                          |                        |
| 42 |                                 |                      |                                                                          |                        |
| 43 |                                 |                      |                                                                          |                        |
| 44 |                                 |                      |                                                                          |                        |
| 45 |                                 |                      |                                                                          |                        |
| 46 |                                 |                      |                                                                          |                        |
| 47 |                                 |                      |                                                                          |                        |

|    |                               |                      |                                                                         |                          |
|----|-------------------------------|----------------------|-------------------------------------------------------------------------|--------------------------|
| 1  | Declaration of interests      | <a href="#">#28</a>  | Financial and other competing interests for principal investigators for | Paper p30                |
| 2  |                               |                      | the overall trial and each study site                                   |                          |
| 3  |                               |                      |                                                                         |                          |
| 4  |                               |                      |                                                                         |                          |
| 5  |                               |                      |                                                                         |                          |
| 6  | Data access                   | <a href="#">#29</a>  | Statement of who will have access to the final trial dataset, and       | Data Management Plan     |
| 7  |                               |                      | disclosure of contractual agreements that limit such access for         | p3-4                     |
| 8  |                               |                      | investigators                                                           |                          |
| 9  |                               |                      |                                                                         |                          |
| 10 |                               |                      |                                                                         |                          |
| 11 |                               |                      |                                                                         |                          |
| 12 |                               |                      |                                                                         |                          |
| 13 |                               |                      |                                                                         |                          |
| 14 | Ancillary and post trial care | <a href="#">#30</a>  | Provisions, if any, for ancillary and post-trial care, and for          | Not specified            |
| 15 |                               |                      | compensation to those who suffer harm from trial participation          |                          |
| 16 |                               |                      |                                                                         |                          |
| 17 |                               |                      |                                                                         |                          |
| 18 |                               |                      |                                                                         |                          |
| 19 | Dissemination policy: trial   | <a href="#">#31a</a> | Plans for investigators and sponsor to communicate trial results to     | Paper p30, Protocol v3.0 |
| 20 | results                       |                      | participants, healthcare professionals, the public, and other relevant  | p61                      |
| 21 |                               |                      | groups (eg, via publication, reporting in results databases, or other   |                          |
| 22 |                               |                      | data sharing arrangements), including any publication restrictions      |                          |
| 23 |                               |                      |                                                                         |                          |
| 24 |                               |                      |                                                                         |                          |
| 25 |                               |                      |                                                                         |                          |
| 26 |                               |                      |                                                                         |                          |
| 27 |                               |                      |                                                                         |                          |
| 28 |                               |                      |                                                                         |                          |
| 29 | Dissemination policy:         | <a href="#">#31b</a> | Authorship eligibility guidelines and any intended use of professional  | Protocol v3.0 p61, study |
| 30 | authorship                    |                      | writers                                                                 | agreement sponsor-study  |
| 31 |                               |                      |                                                                         | site                     |
| 32 |                               |                      |                                                                         |                          |
| 33 |                               |                      |                                                                         |                          |
| 34 |                               |                      |                                                                         |                          |
| 35 |                               |                      |                                                                         |                          |
| 36 |                               |                      |                                                                         |                          |
| 37 | Dissemination policy:         | <a href="#">#31c</a> | Plans, if any, for granting public access to the full protocol,         | Protocol v3.0 p61        |
| 38 | reproducible research         |                      | participant-level dataset, and statistical code                         |                          |
| 39 |                               |                      |                                                                         |                          |
| 40 |                               |                      |                                                                         |                          |
| 41 |                               |                      |                                                                         |                          |
| 42 |                               |                      |                                                                         |                          |
| 43 | <b>Appendices</b>             |                      |                                                                         |                          |
| 44 |                               |                      |                                                                         |                          |
| 45 |                               |                      |                                                                         |                          |
| 46 |                               |                      |                                                                         |                          |
| 47 |                               |                      |                                                                         |                          |

|    |                      |                     |                                                                        |                         |
|----|----------------------|---------------------|------------------------------------------------------------------------|-------------------------|
| 1  | Informed consent     | <a href="#">#32</a> | Model consent form and other related documentation given to            | In TMF Informed Consent |
| 2  |                      |                     |                                                                        |                         |
| 3  | materials            |                     | participants and authorised surrogates                                 | Form v6.0 in Dutch and  |
| 4  |                      |                     |                                                                        | v5.0 in French          |
| 5  |                      |                     |                                                                        |                         |
| 6  |                      |                     |                                                                        |                         |
| 7  |                      |                     |                                                                        |                         |
| 8  | Biological specimens | <a href="#">#33</a> | Plans for collection, laboratory evaluation, and storage of biological | N/A                     |
| 9  |                      |                     | specimens for genetic or molecular analysis in the current trial and   |                         |
| 10 |                      |                     | for future use in ancillary studies, if applicable                     |                         |
| 11 |                      |                     |                                                                        |                         |
| 12 |                      |                     |                                                                        |                         |
| 13 |                      |                     |                                                                        |                         |
| 14 |                      |                     |                                                                        |                         |
| 15 |                      |                     |                                                                        |                         |

16 None The SPIRIT Explanation and Elaboration paper is distributed under the terms of the Creative Commons Attribution License CC-  
 17 BY-NC. This checklist can be completed online using <https://www.goodreports.org/>, a tool made by the [EQUATOR Network](#) in  
 18  
 19 collaboration with [Penelope.ai](#)  
 20  
 21  
 22  
 23  
 24  
 25  
 26  
 27  
 28  
 29  
 30  
 31  
 32  
 33  
 34  
 35  
 36  
 37  
 38  
 39  
 40  
 41  
 42  
 43  
 44

# BMJ Open

## SurLym trial: Study protocol for a multicentre pragmatic randomised controlled trial on the added value of reconstructive lymphatic surgery to decongestive lymphatic therapy for the treatment of lymphoedema

|                               |                                                                                                                                                                                                                                                                                                                                                                                                                                                                                                                                                                                                                                                                                                                                                                                                                                                                                                                                                                                                                                                                                                                                                                                                                                                                                                                                                                                                                                                                                                                                                                                                                                                                                                                                                                                                              |
|-------------------------------|--------------------------------------------------------------------------------------------------------------------------------------------------------------------------------------------------------------------------------------------------------------------------------------------------------------------------------------------------------------------------------------------------------------------------------------------------------------------------------------------------------------------------------------------------------------------------------------------------------------------------------------------------------------------------------------------------------------------------------------------------------------------------------------------------------------------------------------------------------------------------------------------------------------------------------------------------------------------------------------------------------------------------------------------------------------------------------------------------------------------------------------------------------------------------------------------------------------------------------------------------------------------------------------------------------------------------------------------------------------------------------------------------------------------------------------------------------------------------------------------------------------------------------------------------------------------------------------------------------------------------------------------------------------------------------------------------------------------------------------------------------------------------------------------------------------|
| Journal:                      | <i>BMJ Open</i>                                                                                                                                                                                                                                                                                                                                                                                                                                                                                                                                                                                                                                                                                                                                                                                                                                                                                                                                                                                                                                                                                                                                                                                                                                                                                                                                                                                                                                                                                                                                                                                                                                                                                                                                                                                              |
| Manuscript ID                 | bmjopen-2023-078114.R1                                                                                                                                                                                                                                                                                                                                                                                                                                                                                                                                                                                                                                                                                                                                                                                                                                                                                                                                                                                                                                                                                                                                                                                                                                                                                                                                                                                                                                                                                                                                                                                                                                                                                                                                                                                       |
| Article Type:                 | Protocol                                                                                                                                                                                                                                                                                                                                                                                                                                                                                                                                                                                                                                                                                                                                                                                                                                                                                                                                                                                                                                                                                                                                                                                                                                                                                                                                                                                                                                                                                                                                                                                                                                                                                                                                                                                                     |
| Date Submitted by the Author: | 13-Dec-2023                                                                                                                                                                                                                                                                                                                                                                                                                                                                                                                                                                                                                                                                                                                                                                                                                                                                                                                                                                                                                                                                                                                                                                                                                                                                                                                                                                                                                                                                                                                                                                                                                                                                                                                                                                                                  |
| Complete List of Authors:     | <p>Devoogdt, Nele; KU Leuven, Rehabilitation Sciences; KU Leuven University Hospitals Leuven, Center for lymphedema<br/> De Vrieze, Tessa; KU Leuven, Department of Rehabilitation Sciences<br/> Heroes, An-Kathleen; KU Leuven, Department of rehabilitation sciences; KU Leuven University Hospitals Leuven, Center for lymphedema<br/> Bechter-Hugl, Beate; KU Leuven University Hospitals Leuven, Vascular Surgery<br/> Fieuids, Steffen; Katholieke Universiteit Leuven, Biostats<br/> Godderis, Lode; KU Leuven, Centre for Environment and Health of KU Leuven<br/> Segers, Katarina; KU Leuven University Hospitals Leuven, Department of plastic and reconstructive surgery<br/> Maleux, Geert; KU Leuven University Hospitals Leuven, Department of radiology<br/> Deltombe, Thierry; CHU UCL Namur, Centre de Reference du Lymphoedème,<br/> Fripiat, Jacqueline; CHU UCL Namur, Centre de Reference du Lymphoedème,<br/> Servaes, Maxime; CHU UCL Namur<br/> Berners, Aline; CHU UCL Namur<br/> Fosseprez, Philippe; CHU UCL Namur<br/> Krug, Bruno; CHU UCL Namur<br/> Kayser, Françoise; CHU UCL Namur<br/> Falticeanu, Ana; CHU UCL Namur<br/> Randon, Caren; UZ Gent, Department of Thoracic and Vascular Surgery<br/> Monten, Chris; UZ Gent, Department of Radiotherapy<br/> Van Landuyt, Koen; UZ Gent<br/> De Pypere, Bernard; UZ Gent, Department of plastic and reconstructive surgery<br/> Degraeve, Liesl; UZ Gent, Department of plastic and reconstructive surgery<br/> Decorte, Tina; UZ Gent, Department of Physical Medicine and Rehabilitation<br/> De Schryver, Mieke; UZ Gent<br/> Van Besien, Vickie; UZ Gent<br/> Devos, Daniel; UZ Gent<br/> Suominen, Sinikka; Helsinki University Central Hospital<br/> Ayala, Jaume Masia; Universitat Internacional de Catalunya,</p> |

|                                                    |                                                                                                                                                                                                                                       |
|----------------------------------------------------|---------------------------------------------------------------------------------------------------------------------------------------------------------------------------------------------------------------------------------------|
|                                                    | Pons, Gemma; Hospital de la Santa Creu i Sant Pau, Department of plastic surgery<br>Fourneau, Inge; KU Leuven University Hospitals Leuven, Vascular Surgery<br>thomis, sarah; KU Leuven University Hospitals Leuven, Vascular Surgery |
| <b>&lt;b&gt;Primary Subject Heading&lt;/b&gt;:</b> | Cardiovascular medicine                                                                                                                                                                                                               |
| Secondary Subject Heading:                         | Surgery                                                                                                                                                                                                                               |
| Keywords:                                          | Vascular medicine < INTERNAL MEDICINE, Plastic & reconstructive surgery < SURGERY, VASCULAR SURGERY                                                                                                                                   |
|                                                    |                                                                                                                                                                                                                                       |

SCHOLARONE™  
Manuscripts

1  
2  
3 SurLym trial: Study protocol for a multicentre pragmatic randomised controlled trial on the added  
4 value of reconstructive lymphatic surgery to decongestive lymphatic therapy for the treatment of  
5 lymphoedema  
6  
7  
8  
9

10  
11 Nele Devoogdt<sup>1,2</sup>, Tessa De Vrieze<sup>2</sup>, An-Kathleen Heroes<sup>1,2</sup>, Beate Bechter-Hugl<sup>1</sup>, Steffen Fieuws<sup>3</sup>,  
12 Lode Godderis<sup>4</sup>, Katarina Segers<sup>5</sup>, Geert Maleux<sup>6</sup>, Thierry Deltombe<sup>7</sup>, Jacqueline Fripiat<sup>7</sup>, Maxime  
13 Servaes<sup>8</sup>, Aline Berners<sup>8</sup>, Philippe Fosseprez<sup>8</sup>, Bruno Krug<sup>9</sup>, Francoise Kayser<sup>9</sup>, Ana Falticeanu<sup>10</sup>, Caren  
14 Randon<sup>11</sup>, Chris Monten<sup>12</sup>, Koen Van Landuyt<sup>13</sup>, Bernard De Pypere<sup>13</sup>, Liesl Degraeve<sup>13</sup>, Tina Decorte<sup>14</sup>,  
15 Mieke De Schryver<sup>14</sup>, Vickie Van Besien<sup>14</sup>, Daniel Devos<sup>15</sup>, Sinikka Suominen<sup>16</sup>, Jaume Masia<sup>17</sup>,  
16 Gemma Pons<sup>17</sup>, Inge Fourneau<sup>1,‡</sup>, Sarah Thomis<sup>1,‡</sup>  
17  
18  
19  
20  
21  
22  
23

24 ‡ Contributed equally as last author to the SurLym trial  
25  
26  
27  
28

29 <sup>1</sup>University Hospitals Leuven, Department of Vascular Surgery, Centre for Lymphedema, Leuven,  
30 Belgium  
31

32 <sup>2</sup>KU Leuven – University of Leuven, Department of Rehabilitation Sciences, Leuven, Belgium  
33

34 <sup>3</sup>KU Leuven – University of Leuven, Leuven Biostatistics and Statistical Bioinformatics Centre (L-  
35 BioStat), Leuven, Belgium  
36  
37

38 <sup>4</sup>KU Leuven – University of Leuven, Centre for Environment and Health, Leuven, Flanders, Belgium  
39

40 <sup>5</sup>University Hospitals Leuven, Department of Plastic and Reconstructive Surgery, Leuven, Belgium  
41

42 <sup>6</sup>University Hospitals Leuven, Department of Radiology, Leuven, Belgium  
43  
44

45 <sup>7</sup>CHU UCL Namur – Site Godinne, Department of Physical Medicine and Rehabilitation, Centre de  
46 Reference du Lymphoedème, Yvoir, Belgium  
47  
48

49 <sup>8</sup>CHU UCL Namur – Site St-Elisabeth, Department of Plastic and Reconstructive Surgery, Namur,  
50 Belgium  
51  
52

53 <sup>9</sup>CHU UCL Namur – Site Godinne, Nuclear Medicine Department, Université catholique de Louvain,  
54 Yvoir, Belgium  
55  
56

57 <sup>10</sup>CHU UCL Namur – Site Godinne, Department of Radiology, Yvoir, Belgium  
58  
59  
60

1  
2  
3 <sup>11</sup>Ghent University Hospital, Department of Thoracic and Vascular Surgery, Lymphedema Clinic,  
4 Ghent, Belgium

5  
6  
7 <sup>12</sup>Ghent University Hospital, Department of Radiotherapy, Lymphedema Clinic, Ghent, Belgium

8  
9  
10 <sup>13</sup>Ghent University Hospital, Department of Plastic and Reconstructive Surgery, Lymphedema Clinic,  
11 Ghent, Belgium

12  
13  
14 <sup>14</sup>Ghent University Hospital, Department of Physical Medicine and Rehabilitation, Lymphedema  
15 Clinic, Ghent, Belgium

16  
17  
18 <sup>15</sup>Ghent University Hospital, Department of Radiology, Ghent, Belgium

19  
20 <sup>16</sup>Helsinki University and Helsinki University Hospital, Department of Plastic Surgery, Helsinki, Finland

21  
22 <sup>17</sup>Hospital de la Santa Creu i Sant Pau and the Hospital del Mar of Barcelona, Department of Plastic  
23 Surgery, Barcelona, Spain

24  
25  
26  
27  
28 Correspondence to:

29  
30  
31 Prof. Nele Devoogdt

32  
33 UZ Leuven, centre for lymphedema, Weligerveld 1, 3212 Pellenberg, Belgium

34  
35 00 32 16 34 25 15

36  
37 [nele.devoogdt@kuleuven.be](mailto:nele.devoogdt@kuleuven.be)

38  
39  
40  
41  
42 Support statement: TDV is a post-doctoral research fellow of the Research Foundation – Flanders  
43 (FWO).

1  
2  
3 **Trial registration data set**  
4

5  
6  
7  
8  
9  
10  
11  
12  
13  
14  
15  
16  
17  
18  
19  
20  
21  
22  
23  
24  
25  
26  
27  
28  
29  
30  
31  
32  
33  
34  
35  
36  
37  
38  
39  
40  
41  
42  
43  
44  
45  
46  
47  
48  
49  
50  
51  
52  
53  
54  
55  
56  
57  
58  
59  
60

|                                               |                                                                                                                                                                                                                                                                                                                                                              |
|-----------------------------------------------|--------------------------------------------------------------------------------------------------------------------------------------------------------------------------------------------------------------------------------------------------------------------------------------------------------------------------------------------------------------|
| Primary registry and trial identifying number | ClinicalTrials.gov Identifier: NCT05064176                                                                                                                                                                                                                                                                                                                   |
| Date of registration in primary registry      | 24-8-2021                                                                                                                                                                                                                                                                                                                                                    |
| Secondary identifying numbers                 | Ethical Committee UZ Leuven: S63212;<br>EudraCT: 2021-000397-29                                                                                                                                                                                                                                                                                              |
| Source of monetary and material support       | Belgian Health Care Knowledge Centre                                                                                                                                                                                                                                                                                                                         |
| Sponsor                                       | University Hospitals Leuven, Clinical Trial center, Herestraat 49,<br>3000 Leuven, Belgium                                                                                                                                                                                                                                                                   |
| Contact for public and scientific queries     | <a href="mailto:Nele.devoogdt@uzleuven.be">Nele.devoogdt@uzleuven.be</a>                                                                                                                                                                                                                                                                                     |
| Public title                                  | Added value of reconstructive lymphatic surgery to usual care in lymphoedema                                                                                                                                                                                                                                                                                 |
| Scientific title                              | Comparison of reconstructive lymphatic <b>surgery</b> versus no surgery, additional to decongestive lymphatic therapy (usual care), for the treatment of <b>lymphoedema</b> , through a multicenter, pragmatic 3andomized controlled trial                                                                                                                   |
| Acronym                                       | SurLym-trial                                                                                                                                                                                                                                                                                                                                                 |
| Protocol version                              | V3.0 19-4-2022                                                                                                                                                                                                                                                                                                                                               |
| Country of recruitment                        | Belgium                                                                                                                                                                                                                                                                                                                                                      |
| Health condition studied                      | Primary or secondary upper or lower limb lymphoedema stage 1 to 2b                                                                                                                                                                                                                                                                                           |
| Intervention                                  | Intervention group: Reconstructive lymphatic surgery (i.e. LVA or LNT or combination), added to usual care<br>Control group: Only usual care (no surgery)                                                                                                                                                                                                    |
| Key inclusion and exclusion criteria          | -Lymphoedema: upper/ lower limb; uni-/ bilateral; primary or secondary; stage 1 to 2b; $\geq 5\%$ volume difference or $\geq 2$ minor/ 1 major lymphoscintigraphy criterion; total score or one domain score of Lymph-ICF questionnaire $\geq 25/100$<br>-History of DLT ( $\geq 6M$ ) until minimal pitting, no liposuction/ reconstructive surgery in past |



|                         |                                                                                                                                                                                                                                                     |
|-------------------------|-----------------------------------------------------------------------------------------------------------------------------------------------------------------------------------------------------------------------------------------------------|
|                         | -In case of lower limb lymphoedema: no CVI C4-C6, no DVT/ PTS<br>-Age $\geq$ 18 years, not pregnant, BMI $\leq$ 35<br>-No allergy for ICG/ iodine; no increased activity/ benign tumor thyroid gland; no heparin use and severe renal insufficiency |
| Study type              | Multicentre, pragmatic randomised controlled trial                                                                                                                                                                                                  |
| Date of first enrolment | March 2022                                                                                                                                                                                                                                          |
| Target sample size      | 180                                                                                                                                                                                                                                                 |
| Recruitment status      | Recruiting                                                                                                                                                                                                                                          |
| Primary endpoint        | Lymphoedema-specific QOL, at 18 months post-baseline                                                                                                                                                                                                |
| Key secondary endpoints | Limb volume, at 18 months post-baseline<br>Duration of wearing the compression garment, at 18 months post-baseline                                                                                                                                  |
| Treatment duration      | 18 months (usual care)                                                                                                                                                                                                                              |
| Follow up duration      | 36 months                                                                                                                                                                                                                                           |

## Abstract

### Introduction

Lymphoedema is a chronic condition caused by lymphatic insufficiency. It leads to swelling of the limb/ midline region and an increased risk of infection. Lymphoedema is often associated with mental and physical problems limiting quality of life. The first choice of treatment is a conservative treatment, consisting of exercises, skin care, lymph drainage and compression. Reconstructive lymphatic surgery is also often performed, i.e. lymphovenous anastomoses (LVA), lymph node transfer (LNT), or a combination. However, robust evidence on the effectiveness of reconstructive lymphatic surgery is missing. Therefore, the objective of this trial is to investigate the added value of reconstructive lymphatic surgery to the conservative treatment in patients with lymphoedema.

### Methods and analysis

A multicentre randomised controlled and pragmatic trial was started since March 2022 in 3 Belgian university hospitals. Ninety patients with arm lymphoedema and 90 patients with leg lymphoedema will be included. All patients are randomised between conservative treatment alone (control group) or conservative treatment with reconstructive lymphatic surgery (intervention group). Assessments are performed at baseline and at 1, 3, 6, 12, 18, 24 and 36 months. The primary outcome is lymphoedema-specific quality of life at 18 months. Key secondary outcomes are limb volume and duration of wearing the compression garment at 18 months. The approach of reconstructive lymphatic surgery is based on pre-surgical investigations including clinical examination, lymphofluoroscopy, lymphoscintigraphy, lymph MRI or CT angiography (if needed). All patients receive conservative treatment during 36 months, which is applied by the patient's own physical therapist and by the patient self. From month 7-12, the hours a day of wearing the compression garment are gradually decreased.

### Ethics and dissemination

The study has been approved by the ethical committees of University Hospitals Leuven, Ghent University Hospital and CHU UCL Namur. Results will be disseminated via peer-reviewed journals and presentations.

ClinicalTrials.gov Identifier: NCT05064176

Keywords: lymphedema, reconstructive surgery, surgical anastomosis, surgical flap

Word count: 4623 (up to data security and management), 5050 for all parts

**Strengths and limitations of this study**

- 1) This trial is stratified and powered for the effect of reconstructive lymphatic surgery in both arm and leg lymphoedema and will permit a conclusion regarding the effect of reconstructive lymphatic surgery in both groups.
- 2) As independent experts in reconstructive lymphatic surgery have trained the surgeons of the 3 study centers and advanced imaging techniques (i.e. ICG lymphofluoroscopy, lymph MRI, lymphoscintigraphy and CT angiography) are used to prepare the surgical procedure, high-qualitative reconstructive surgery procedures are guaranteed.
- 3) A comprehensive evaluation of the participants with lymphoedema will be performed by assessing lymphoedema-specific quality of life, which is a self-reported outcome, and by determining limb volume and duration of wearing the compression garment, which are objective outcomes.
- 4) If reconstructive lymphatic surgery is found effective, a detailed inventory of cost and quality of life will permit a cost-effectiveness analysis.
- 5) Besides a statistical plan, also a monitoring plan, data management plan, communication plan and risk assessment plan has been set in place.

## INTRODUCTION

Lymphoedema is a chronic and debilitating condition caused by lymphatic insufficiency. It leads to swelling of the limb/ midline region and an increased risk of infection. It can be classified as primary (congenital) or secondary (acquired) lymphoedema. Lymphoedema is very burdensome for the patient, often causing mental problems such as frustration and stress.(1) In addition, due to the increase in volume of the limb, patients may develop physical problems, such as pain, heaviness, loss of strength, as well as functional problems with household, mobility or social activities.(2) These mental, physical and functional problems have a negative impact on the quality of life and the ability to work.(3)

There is consensus that the first choice of treatment of lymphoedema is a conservative treatment, also called decongestive lymphatic therapy (DLT).(4, 5) In case of pitting oedema, this consists of an intensive daily treatment to maximally reduce the oedema volume. This phase consists of skin care, manual lymph drainage, multilayer bandaging and exercise therapy. Once sufficient reduction of the pitting is obtained (i.e. there is no or minimal pitting) and the patients received education to improve their self-management skills, the maintenance phase starts, which aims at stabilising the results obtained in the previous phase. During the maintenance phase, skin care, exercises and lymph drainage are continued but bandaging is replaced by low-stretch compression garments. Professional's involvement can be minimised in this phase.

Reconstructive lymphatic surgery is another treatment option, consisting of either lymphovenous anastomoses (LVA), lymph node transfer (LNT) or a combination of both. The choice can be based on the surgeons clinical judgement or on local algorithms, as the Barcelona Lymphoedema Algorithm.(6) The objective of LVA is to redirect the lymph to the venous stream directly, bypassing areas of obstruction, and without going through the thoracic duct. LVA is applied if functional lymphatics can be localized, primarily by ICG lymphofluoroscopy and lymph MRI.(7) With LNT, orthotopically placed lymph nodes act as a sponge to absorb lymphatic fluid and direct it into the vascular network. The transferred nodes may also induce lymphangiogenesis and if they are placed in the site of lymphadenectomy, scar tissue and adhesions are removed, which may lower the pressure on the vein.(8) The lymphangiogenesis and the increase of the diameter of the vein as well may improve vascularisation.(5, 9) Indications for LNT are a total occlusion of lymphatic transport visualised through lymphoscintigraphy and a stage 2 lymphoedema with repeated episodes of erysipelas. Only subjects who had a history of at least 6 to 12 months of conservative treatment with good decongestion of the limb are candidates for reconstructive lymphatic surgery.(7)

1  
2  
3 Our hypothesis is that reconstructive lymphatic surgery partially restores the lymphatic transport  
4 which leads to a decrease of the lymphoedema volume and as a result lowers the need for a  
5 compression garment. This will probably improve lymphoedema-specific quality of life.  
6  
7

8  
9 Robust evidence on the effectiveness of reconstructive lymphatic surgery for lymphoedema has so  
10 far not been procured. In 2019, a Cochrane systematic review of Markkula et al revealed that there is  
11 not enough high-quality research investigating the effect of reconstructive lymphatic surgery on  
12 lymphoedema.(10) Only one RCT so far evaluated the effect of LNT. Dionyssiou et al randomised 36  
13 patients with breast cancer related arm lymphoedema.(11) After surgery/no surgery, all patients first  
14 received for 6 months DLT and DLT was discontinued for the next 12 months. At 18 months follow-  
15 up, mean limb volume reduction was superior in the group with LNT compared to no LNT (57% vs  
16 18%,  $p < 0.01$ ). In the group with LNT infections were less frequent and subjective symptoms  
17 improved. An RCT evaluating the effect of LVA has not been performed yet.  
18  
19  
20  
21  
22  
23  
24  
25  
26

## 27 **Objectives**

28  
29 The main objective of this study is to investigate the added value of reconstructive lymphatic surgery  
30 to decongestive lymphatic therapy (usual care) in patients with lymphoedema of the upper limb or  
31 lower limb in terms of lymphoedema-specific QoL (primary outcome), limb volume and duration of  
32 wearing the compression garment (key secondary outcomes) at 18 months and of other outcomes at  
33 1, 3, 6, 12, 18, 24 and 36 months post-baseline (secondary outcomes; see table 1 for the outcomes).  
34  
35

36  
37 A secondary objective is to verify whether the rate of complications in participants receiving  
38 reconstructive lymphatic surgery is acceptable and if so, whether these complications are reversible.  
39 We also verify in patients with lymphoedema due to cancer treatment, if reconstructive lymphatic  
40 surgery causes higher cancer recurrence rates.  
41  
42  
43  
44

45  
46 A first exploratory objective is to compare the added value of the reconstructive surgery between  
47 different subgroups (stage 1 vs stage 2; normal weight vs overweight; combination of LVA and LNT vs  
48 one method). A second exploratory objective is to investigate predictive variables for lymphoedema-  
49 specific QoL at 36 months.  
50  
51  
52  
53  
54  
55  
56  
57  
58  
59  
60

Table 1 Overview of the primary and secondary outcomes and the assessment method at each time interval

| Outcome                                                                        | Method                                                                         | A1       | A2, 3, 4 | A5  | A6  | A7  | A8  |
|--------------------------------------------------------------------------------|--------------------------------------------------------------------------------|----------|----------|-----|-----|-----|-----|
|                                                                                |                                                                                | Baseline | 1, 3, 6M | 12M | 18M | 24M | 36M |
| Primary outcome                                                                |                                                                                |          |          |     |     |     |     |
| Lymphoedema-specific QoL                                                       | Lymph-ICF questionnaire for upper or lower limb lymphoedema(12-15)             | X        |          |     | X   |     |     |
| Secondary outcomes                                                             |                                                                                |          |          |     |     |     |     |
| Self-reported questionnaire                                                    |                                                                                |          |          |     |     |     |     |
| Lymphoedema-specific QoL                                                       | See primary outcome                                                            | X        | X        | X   |     | X   | X   |
| Duration (key secondary outcome) and experience of wearing compression garment | ICC compression questionnaire(16)                                              | X        | X        | X   | X   | X   | X   |
| Health related QoL                                                             | EuroQoL-5D-5L(17)                                                              | X        | X        | X   | X   | X   | X   |
| Work capacity and ability                                                      | Work Productivity and Activity Impairment questionnaire;(18) QuickScan 18 (19) | X        | X        | X   | X   | X   | X   |
| Physical activity level                                                        | International Physical Activity Questionnaire(20)                              | X        | X        | X   | X   | X   | X   |

1  
2  
3  
4  
5  
6  
7  
8  
9  
10  
11  
12  
13  
14  
15  
16  
17  
18  
19  
20  
21  
22  
23  
24  
25  
26  
27  
28  
29  
30  
31  
32  
33  
34  
35  
36  
37  
38  
39  
40  
41  
42  
43  
44  
45  
46

|                                                                        |                                                             |   |   |   |   |   |   |
|------------------------------------------------------------------------|-------------------------------------------------------------|---|---|---|---|---|---|
| Costs related to lymphoedema and its treatment*                        | Study-specific questionnaire                                |   | X | X | X | X | X |
| Usual care & self-management*§, including need for intensive treatment | Study-specific questionnaire                                |   | X | X | X | X | X |
| <b>Assessments</b>                                                     |                                                             |   |   |   |   |   |   |
| Limb volume (key secondary outcome)                                    | Circumference measurements every 4 cm with perimeter(21-24) | X | X | X | X | X | X |
| Hand/ foot volume                                                      | Water displacement method of hand or foot(22, 25)           | X | X | X | X | X | X |
| Failure to reduce hours a day of wearing compression garment           | Based on change of limb volume                              |   |   | X | X | X | X |
| Body weight                                                            | Scale                                                       | X | X | X | X | X | X |
| Infection previous 18 months                                           | Interview                                                   | X |   |   | X |   | X |
| Recurrence of cancer                                                   | Interview and medical file                                  |   |   |   | X |   | X |
| Adverse events and complications of surgery                            | Interview and medical file                                  |   | X | X | X | X | X |
| Lymphatic transport                                                    | ICG fluoroscopy;(26) lymphoscintigraphy(27, 28)             | X |   |   | X |   |   |

\* Information is collected on a monthly basis; § No secondary outcome

## METHODS AND ANALYSIS

Described according to the SPIRIT guidelines.(29)

### Trial design and study setting

A multicentre, pragmatic randomised controlled trial is performed at three university hospitals in Belgium: University Hospitals Leuven (UZ Leuven), Ghent University Hospital (UZ Gent) and CHU UCL Namur.

The general flow, starting from screening for eligibility, is shown in figure 1.

Before the real screening (A0), a fast eligibility check is performed and Informed Consent Form is signed. If the patient is eligible and confirms participation, he/ she is randomised. The interval between screening (A0) and baseline assessment (A1) is ideally less than 3 months, but may be up to 6 months. The baseline assessments have to be performed shortly before the surgery, with a maximal interval of 1 month.

Figure 1. Flow diagram of the SurLym trial

### Patient and public involvement in the trial design

Four patients with arm lymphoedema and 3 patients with leg lymphoedema from the center for lymphedema of UZ Leuven have completed a questionnaire about the study design and feasibility of the SurLym study. All but one patient, found the primary outcome, assessment of lymphoedema-specific QoL, a relevant and very important outcome. This patient preferred arm volume (which is a key secondary outcome) as outcome measure. None of the patients objected to a technical examination using an injection in the hand/ foot of the affected side (for imaging of the lymphatic system). All patients found it feasible to come to the hospital for 8 study-visits during 36 months, well aware that two of the visits take up to 6 hours. Three of seven patients were not keen to undergo surgery at the affected limb. All patients declared having little problems performing usual care: only one patient considered self-management difficult and another patient was afraid to reduce the hours of wearing the compression garment.

From the patients willing to be part of the trial's patient board (n=5), two patients were selected: one patient with arm lymphoedema and one with leg lymphoedema. They are both member of the Trial Steering Committee. The rationale and design of the trial was thoroughly discussed with them. They



1  
2  
3 will be invited to further participate during future meetings of the Trial Steering Committee, to  
4 advise us during the course of the trial and for the dissemination of the project results.  
5  
6  
7  
8

### 9 **Eligibility criteria**

10  
11 Patients *eligible for inclusion* in the trial have to meet all of the following criteria:

- 12 1) Unilateral or bilateral, primary or secondary lymphoedema of the upper or lower limb;
- 13 2) If cancer-related lymphoedema, approval for participation from the multidisciplinary oncological  
14 board; participation only if estimated cancer-related survival is  $\geq 3$  years and no concerns on  
15 oncological safety are raised;
- 16 3) Lymphoedema stage 1 to 2 (according to staging 1-3 of International Society of Lymphology)(5);
- 17 4) Objective diagnosis of lymphoedema:  $\geq 5\%$  volume difference OR  $\geq 2$  minor/ 1 major criteria on  
18 lymphoscintigraphy OR presence of ICG dermal backflow;
- 19 5) Total score or one of domain scores on Lymph-ICF questionnaire at screening:  $\geq 25/100$  (= moderate level of problems in functioning related to the development of lymphoedema)(14);
- 20 6) History of at least 6 months of DLT until minimal pitting;
- 21 7) Age  $\geq 18$  years.

22  
23  
24  
25  
26  
27  
28  
29  
30  
31  
32  
33  
34 Following persons are *excluded*:

- 35 1) Persons with history of liposuction, LVA or LNT;
- 36 2) Persons who are pregnant or plan to become pregnant in the next 18 months;
- 37 3) Severely obese participants: BMI $>35$ ;
- 38 4) In case of lower limb lymphoedema: presence of chronic venous insufficiency C4, C5, C6; deep  
39 venous thrombosis; post-thrombotic syndrome;
- 40 5) Allergy for ICG, iodine; increased activity of thyroid gland; benign tumour in thyroid gland; heparin  
41 use and severe renal insufficiency  
42  
43  
44  
45  
46  
47  
48

### 49 **Recruitment, participant screening and consent**

50  
51 The recruitment of patients started in March 2022. One hundred eighty patients have to be recruited  
52 by the 3 hospitals. Initially a recruitment period of 24 months (= 7.5 pts/ month) was planned  
53 however difficulties in accessing operating theatres linked to COVID have caused delays. To make the  
54 recruitment period as short as possible, a competitive recruitment is applied. We estimate that  
55 around 20% of the patients screened for eligibility (A0, n=900) can be accepted for participation.  
56  
57  
58  
59  
60

1  
2  
3 Identification of eligible patients will be performed by the (sub)investigators of the lymphoedema  
4 centres of the 3 hospitals (ST, BBH, AKH and ND for UZ Leuven; CM, CR, TD, VVB, MDS for UZ Gent;  
5 and TD, JF, MS, AB, PF for CHU UCL Namur), supported by the study coordinators. The consultation  
6 lists of the lymphoedema centres are screened before the consultation and the possible patients  
7 eligible for the trial are marked.  
8  
9

10  
11  
12 During the lymphoedema consultation, the clinician checks the eligibility criteria for which a  
13 measurement is not necessary; if the patient seems eligible and he/ she is interested to receive  
14 information about the trial, the trial is discussed using a study-specific recruitment document: this is  
15 a concise and well-organised document that clarifies the design of the study and provides  
16 information about side effects, costs and potential benefits and harms of participation. If a patient is  
17 interested to participate, he/ she receives the Informed Consent Form and the 'study at a glance  
18 (summary)' document. In addition, the patient receives an appointment for the screening (A0). Some  
19 patients are informed about the trial through another way, e.g. by their oncologist. In that case, the  
20 patient contacts the study coordinator by phone, who performs the fast eligibility check and  
21 discusses the study during the phone call. If the patient is interested to participate, the Informed  
22 Consent Form and the 'study at a glance' document is sent. In addition, the patient receives an  
23 appointment for the screening (A0).  
24  
25  
26  
27  
28  
29  
30  
31

32 During the *screening appointment (A0)*, patients receive all information and explanation they request  
33 or need before signing the Informed Consent Form. Thereafter, the complete screening procedure is  
34 executed to verify whether the participant fulfils all eligibility criteria.  
35  
36  
37  
38  
39

40 In order to optimally recruit patients with lymphoedema, the study is presented inside (at other  
41 departments) as well as outside the hospitals of the study centers by lectures, posters and mailing.  
42 Potential candidates with lymphoedema as well as their treating physicians, physical therapists and  
43 other health care providers are informed about the trial (through social media, publication in local  
44 journals and on websites).  
45  
46  
47  
48  
49  
50

### 51 **Allocation and randomisation**

52  
53 Given the nature of the trial, *blinding* of participants and care providers (surgeon/ physical therapist/  
54 compression specialist) is not feasible. Because the participants fill out different questionnaires to  
55 determine the primary outcome and some of the secondary outcomes, detection bias may be a  
56 potential risk. However, bias of the participants will be limited as much as possible because the study  
57  
58  
59  
60

1  
2  
3 will be explained by a neutral person (physical therapists ND, AKH, VVB, MDS, JF or physical medicine  
4 & rehabilitation physician TD (hospital of Ghent), TD (hospital of CHU UCL)).  
5  
6

7 The *randomisation* is computer generated. To obtain concealment of allocation, the randomisation  
8 list is prepared by the trial's statistician (SF) and is incorporated in the data management tool  
9 'REDCap'. Randomisation is performed by using varying block sizes. A 1:1 allocation ratio is applied. A  
10 stratification is applied for study centre (UZ Leuven vs UZ gent vs CHU-UCL Namur) and for region of  
11 lymphoedema (upper limb vs lower limb, with a ratio 1:1). At each participating site, only the chief  
12 investigator (ND) and trial manager (TDV), investigators and study coordinators have access to the  
13 randomisation tool in REDCap. After randomisation, the study coordinator of the specific study  
14 centre plans the intervention if applicable (surgery), as well as the usual care and the follow-up  
15 assessments.  
16  
17  
18  
19  
20  
21

22 After all patients have finished the trial and the database is locked to analyse the data, the  
23 randomisation code will be broken.  
24  
25  
26  
27  
28

## 29 **Intervention**

30  
31 All participants are randomised to the intervention or control group. The intervention group is  
32 treated with reconstructive lymphatic surgery in addition to conservative DLT (decongestive  
33 lymphatic therapy; usual care). In the control group patients only receive conservative DLT (usual  
34 care) without surgery (see figure 1).  
35  
36  
37

38 The researchers will follow the protocol as strictly as possible. However, since the pragmatic nature  
39 of the trial, a deviation of the protocol is allowed if necessary. This protocol deviation has to be  
40 registered in the protocol deviation log.  
41  
42  
43  
44  
45  
46

### 47 *Reconstructive lymphatic surgery*

48  
49 The intervention treatment is reconstructive lymphatic surgery and is performed by the team of  
50 vascular and/ or plastic surgeons from each study center (ST and KT of UZ Leuven; BDP and LD of  
51 Ghent University Hospital; and MS, AB and PF of CHU UCL Namur). As reconstructive technique, a  
52 lymphovenous anastomosis (LVA), lymph node transfer (LNT) or a combination of both is applied.  
53  
54 The choice of the technique is determined by the surgeons of the study centre. See table 2 for the  
55 overview of the preparation and for the technical description of the reconstructive procedure (which  
56 is based on Chang et al).(7) In table 3 the aftercare is discussed.  
57  
58  
59  
60

1  
2  
3 To obtain standardisation and to ascertain the quality of the reconstructive lymphatic surgery, all  
4 surgeons received training in the Reconstructive Microsurgery European School (by JM and GP) in  
5 May 2021. Moreover, to improve standardisation of the patient selection and the reconstructive  
6 lymphatic procedure between the surgeons and between the centres, every patient that is planned  
7 for surgery in the trial is discussed during a monthly meeting with at least one surgeon per centre  
8 attending. A final quality control measure is that the first 10 surgical procedures are discussed with  
9 the whole surgical team including the independent experts JM, GP, SS and KVL.  
10  
11  
12  
13  
14  
15  
16  
17  
18  
19  
20  
21  
22  
23  
24  
25  
26  
27  
28  
29  
30  
31  
32  
33  
34  
35  
36  
37  
38  
39  
40  
41  
42  
43  
44  
45  
46  
47  
48  
49  
50  
51  
52  
53  
54  
55  
56  
57  
58  
59  
60

For peer review only

Table 2. Overview of the preparation and procedure of LVA and LNT

| Timing              |                                                         | Lymphovenous anastomosis (LVA)                                                                                                                                                           | Lymph node transfer (LNT)                                                                                                                                                                                                                                                                     |
|---------------------|---------------------------------------------------------|------------------------------------------------------------------------------------------------------------------------------------------------------------------------------------------|-----------------------------------------------------------------------------------------------------------------------------------------------------------------------------------------------------------------------------------------------------------------------------------------------|
| Before surgery      | Clinical reasoning based on pre-surgical investigations | Presence of suitable lymphatic vessel(s), visualised through ICG lymphofluoroscopy and/ or lymph MRI.                                                                                    | Presence of fibrosis or adhesions due to surgery, lymph node dissection and/ or radiotherapy, known through inspection and visualisation of interruption of lymphatic transport by lymphoscintigraphy.<br>Presence of a well-vascularised donor flap (CT angiography is performed if needed). |
| Week before surgery | Compression garment                                     | Measured by the team of compression specialists of the specific center;<br>Choice of the type of compression garment is made pragmatically, as performed in the real clinical situation. |                                                                                                                                                                                                                                                                                               |
|                     | Registration of compression garment                     | Compression specialist registers each time after delivery the type of compression material and cost for patient/ health insurance.                                                       |                                                                                                                                                                                                                                                                                               |
| Surgery             | Material                                                | Microsurgical equipment to make anastomoses of vessels with diameter of 0.3-0.8 mm (suture size 11 or 12), supermicro clips, fine bipolar.                                               | Microsurgical equipment to perform vascularised lymph-tissue transfer, suturing vein and artery with suture size 9 or 10, micro clips, fine bipolar.                                                                                                                                          |
|                     | Preparation                                             | ICG is injected interdigitally and lymph transport is designed on skin and location(s) of anastomosis is indicated (confirmed by lymph MRI).                                             | To check for the safety not developing limb oedema due to the dissection of lymph nodes, <sup>99m</sup> Tc nanocolloids or ICG are injected in 1 <sup>st</sup> web of both hands (in case the donor site is the axilla) or feet (in case the donor site is the groin).                        |
|                     | Anaesthesia                                             | General or if wish of patient local                                                                                                                                                      | General                                                                                                                                                                                                                                                                                       |

|  |              |                                                                                                                                                                                                                                                                                                                                                                                                                                                                                                                                                                                                                                                   |                                                                                                                                                                                                                                                                                                                                                                                                                                                                                                                                                                                                                                                                                          |
|--|--------------|---------------------------------------------------------------------------------------------------------------------------------------------------------------------------------------------------------------------------------------------------------------------------------------------------------------------------------------------------------------------------------------------------------------------------------------------------------------------------------------------------------------------------------------------------------------------------------------------------------------------------------------------------|------------------------------------------------------------------------------------------------------------------------------------------------------------------------------------------------------------------------------------------------------------------------------------------------------------------------------------------------------------------------------------------------------------------------------------------------------------------------------------------------------------------------------------------------------------------------------------------------------------------------------------------------------------------------------------------|
|  | Procedure    | <ol style="list-style-type: none"> <li>1) Patent blue is injected distal of location of anastomosis.</li> <li>2) 2-3 cm incision.</li> <li>3) Functional lymphatic is dissected, lymphatic is kept wet and lumen is made open; picture is taken.</li> <li>4) Lymphatic is anastomosed to vein.</li> <li>5) Between 1 and 10 anastomoses are made.</li> <li>5) With ICG camera is checked whether anastomosis is open.</li> <li>6) Wound is covered and cotton wool and elastic bandages are applied around the whole limb.</li> </ol>                                                                                                             | <ol style="list-style-type: none"> <li>1) ICG is injected interdigitally.</li> <li>2) Patent blue is injected distal of donor side flap.</li> <li>3) Donor site flap is resected (= lymph nodes and skin and tissue around): in most cases groin proximal of inguinal ligament, sometimes lateral trunk; picture is taken.</li> <li>4) Donor site flap is transferred to recipient site (= region with fibrosis/ adhesion): a wide excision of scar tissue is made to ensure a healthy bed for lymphangiogenesis and to improve bridging of lymphatics; picture is made.</li> <li>5) Wound is covered and cotton wool and elastic bandages are applied around the whole limb.</li> </ol> |
|  | Registration | <ol style="list-style-type: none"> <li>1) Duration of procedure (in minutes).</li> <li>2) Description of procedure: LVA vs LNT vs combination; general vs local anaesthesia; per-operative ICG fluoroscopy or scintigraphy; injection patent blue and localisation; for LVA, number of anastomoses and location; for LNT, donor site and recipient site.</li> <li>3) Material (amount): flacon ICG/ patent blue; surgical wire; wound dressing; bandaging material (cotton wool, non-elastic bandages, tubular bandage); other material</li> <li>4) Personnel (number and duration of presence): surgeon(s); nurse(s); other personnel</li> </ol> |                                                                                                                                                                                                                                                                                                                                                                                                                                                                                                                                                                                                                                                                                          |

1  
2  
3  
4  
5  
6  
7  
8  
9  
10  
11  
12  
13  
14  
15  
16  
17  
18  
19  
20  
21  
22  
23  
24  
25  
26  
27  
28  
29  
30  
31  
32  
33  
34  
35  
36  
37  
38  
39  
40  
41  
42  
43  
44  
45  
46

Table 3. Overview of the after care in the hospital and at home following LVA and LNT.

| Timing                |                     | Lymphovenous anastomosis (LVA)                                                                                                                                                                                                                                                     | Lymph node transfer (LNT)     |
|-----------------------|---------------------|------------------------------------------------------------------------------------------------------------------------------------------------------------------------------------------------------------------------------------------------------------------------------------|-------------------------------|
| Aftercare in hospital | Number of days      | 1 day or longer if necessary                                                                                                                                                                                                                                                       | 2 days or longer if necessary |
|                       | Medication          | To prevent thrombosis, to stimulate vasodilation, to reduce pain, to prevent infection                                                                                                                                                                                             |                               |
|                       | Inelastic bandage   | In most of the patients (if risk of damaging LVA/ LNT by putting on compression garment;<br>First tubular bandage and cotton wool covering whole limb, then non-elastic bandages, finally other tubular bandage over bandages (to keep everything together); keep it day and night |                               |
|                       | Advise              | As much as possible limb elevation and regularly muscle contractions                                                                                                                                                                                                               |                               |
|                       | Registration        | 1) Number of days of hospitalisation<br>2) Material (amount): bandaging material (cotton wool, non-elastic bandages, tubular bandage); other material<br>3) Medication (type and amount)                                                                                           |                               |
| Aftercare at home     | Wound control       | Once a week, inelastic bandage is removed, wound is cared and bandage is re-applied                                                                                                                                                                                                |                               |
|                       | Advise              | As long as wound is not closed, as much as possible limb elevation and regularly muscle contractions                                                                                                                                                                               |                               |
|                       | Compression garment | If wound is healed, new compression garment is applied and usual care protocol is started                                                                                                                                                                                          |                               |
|                       | Registration        | 1) Number of wound control visits and duration<br>2) Material (amount): bandaging material (cotton wool, non-elastic bandages, tubular bandage); wound care material; other material<br>3) Personnel (number and duration of presence): surgeon(s); nurse(s); other personnel      |                               |

### *Usual care*

All patients receive usual care. The patient's own (regular) physical therapist performs the usual care in a pragmatic way consisting of exercises and skin care and manual lymph drainage (MLD) (i.e. the maintenance phase of decongestive lymphatic therapy (DLT)). Moreover, the physical therapist educates the patient to perform self-management, i.e. self-exercises, self-skin care, self-MLD, self-bandaging and putting on and removing the compression garment. In all patients (of intervention and control group), a new compression garment is measured by the compression specialist at baseline. The schematic overview of the usual care is given in figure 1 and is divided into four periods:

1) M1-6: From week 3 (or, in the intervention group, after healing of the wounds) the patient sees the home physical therapist twice per week and from week 5 once a week. The patient also performs self-management.

2) M7-12: The patient sees the own physical therapist once a week. The compression garment use is gradually reduced from 16h/d (end of 6<sup>th</sup> month) to 0h/d (end of 12<sup>th</sup> month). The own physical therapist performs circumference measurements of the limb weekly (i.e. with a perimeter provided by the study team) to control for changes of the limb volume(23). The patient completes a digital scoring form in REDCap weekly. The study investigator of the center checks the change of limb volume every week: if the limb volume increases  $\geq 5\%$  compared to baseline, the patient is planned for an intermediate checkup in the study center. The study investigator decides whether the hours a day of wearing the compression garment has to be increased again.

3) M13-18: The patient only performs self-management and does not see the own physical therapist anymore. If possible, the patient does not wear the compression garment.

4) M19-36: The patient may choose whether he/ she visits the own physical therapist or performs self-management, or a combination.

This scheme of usual care has to be followed as strictly as possible, except when the patient's clinical situation deteriorates or risks to deteriorate. For example, a patient may visit the physical therapist more often in case of more lymphoedema-related complaints due to warm weather. Or, if during the follow-up, the clinical situation of the lymphoedema deteriorates unacceptably (e.g. there is presence of pitting oedema in the limb or there is a wound), the study investigator may advise the patient and physical therapist to perform an intensive treatment of the lymphoedema with bandaging. This information has to be registered by the patient in the usual care questionnaire.



1  
2  
3 To obtain standardisation of the usual care, the physical therapist of the patient receives a training  
4 before the start of the study. During this training, instructions about the study protocol are given  
5 orally. In addition, the physical therapist receives an informative leaflet explaining the aim and design  
6 of the trial, the treatment in the intervention/ control group and the assessment of the patient. It  
7 also clarifies what the study investigators expect from the patient's physical therapist and vice-versa.  
8 Following information regarding the patient's physical therapist is collected: age and gender,  
9 education level and experience with treating lymphoedema (number of years of experience and in  
10 which modalities, type of lymphoedema education).

### 19 **Outcomes**

21 The outcome measures were chosen based on input from patients with lymphoedema (see section  
22 'patient and public involvement') and on input from the investigators of this trial who have  
23 experience in evaluating and treating patients with lymphoedema. Patient-reported outcomes  
24 provide essential information about the patient experience with the intervention that cannot be  
25 reliably captured in another way, and are necessary for the complete evaluations of risks and  
26 benefits and the value of the intervention. As a consequence, the trial's primary outcome is a  
27 patient-reported outcome.<sup>(30)</sup> Moreover, recently, Chang et al stated in their systematic review and  
28 meta-analysis about the surgical treatment of lymphoedema that better designed studies are  
29 necessary: with objective reporting of outcomes using quantitative methods for measuring fluid and  
30 both physiologic and immunologic function during longer follow-up.<sup>(31)</sup>

31 Assessments are performed at baseline (A1) and at 1 month (A2), 3 months (A3), 6 months (A4), 12  
32 months (A5), 18 months (A6), 24 months (A7) and 36 months (A8) post-baseline. However, to limit  
33 the burden for the patients, not all outcomes are assessed at each time interval. See table 1 for the  
34 overview of the outcomes per time interval and see the Appendix for the assessment method and  
35 the description of the assessment per variable and outcome. Figure 1 gives an overview of the timing  
36 of the baseline assessment related to the screening and to the surgery, and of the foreseen windows  
37 for the follow-up assessments.

38 At baseline, patient's demographics and information about the characteristics of the lymphoedema  
39 and its treatment is collected.

40 The primary outcome is lymphoedema-specific QoL (= problems in functioning related to  
41 development of lymphoedema) at 18 months, evaluated with the Dutch or French version of the  
42 Lymph-ICF questionnaire for upper or lower limb lymphoedema.<sup>(13-15, 32)</sup> Besides this patient-  
43  
44  
45  
46  
47  
48  
49  
50  
51  
52  
53  
54  
55  
56  
57  
58  
59  
60

1  
2  
3 reported outcome, the trial contains also two key secondary outcomes at 18 months that are  
4 objective outcomes. These are limb volume and failure to reduce the hours a day of wearing the  
5 compression garment. In addition, these outcomes will be investigated at other time points in the  
6 short term (1, 3, 6, 12 months) and longer term (24 and 36 months) as a secondary outcome  
7 parameter. The outcome limb volume is determined differently in participants with upper and lower  
8 limb lymphoedema. Since most of the patients with upper limb lymphoedema have unilateral  
9 lymphoedema, limb volume is determined as the relative excessive arm volume. As too many  
10 patients with lower limb lymphoedema have bilateral lymphoedema, limb volume is determined as  
11 the leg volume.  
12

13  
14  
15  
16  
17  
18  
19 Other secondary outcomes are: duration of wearing the compression garment during one week and  
20 experience of the compression garment, health-related QoL, work capacity and ability, physical  
21 activity level, costs related to lymphoedema and its treatment, need for intensive treatment, hand/  
22 foot volume, failure to reduce the hours a day of wearing the compression garment, body weight,  
23 episodes of infection previous 18 months, recurrence of cancer (in patients with history of cancer),  
24 adverse events and lymphatic transport.  
25  
26  
27  
28

29  
30  
31  
32  
33  
34  
35  
36  
37  
38  
39  
40  
41  
42  
43  
44  
45  
46  
47  
48  
49  
50  
51  
52  
53  
54  
55  
56  
57  
58  
59  
60  
Complications of surgery (in the intervention group) and information regarding usual care and self-  
management are collected during the trial period as well.

There is also a follow-up contact by phone at 9M and 15M, respectively. During the phone call,  
information is further collected about adverse events and complications of the surgery, about the  
usual care & self-management (to check for the adherence of the patient) and about the costs  
related to lymphoedema and its treatment.

To guarantee standardisation of the assessments all assessors are trained before the start of the trial.

### **Sample size**

The sample size is calculated to have at least 90% power to detect a difference between the  
intervention group receiving reconstructive surgery and the control group without surgery, on  
lymphoedema-specific QoL at 18 months, separately within patients with upper limb lymphoedema  
and within patients with lower limb lymphoedema. Both comparisons are considered as separate  
trials and therefore alpha has been set equal to 0.05.

The planned analysis to compare the groups is a constrained longitudinal data analysis (cLDA),(33)  
using the baseline measurement and the follow-up measurements after 1, 3, 6, 12 and 18 months as  
outcome. The primary analysis refers to the comparison after 18 months (based on a two-sided test

1  
2  
3 with  $\alpha=0.05$ ). The approach is similar in spirit as an analysis of covariance (ANCOVA) but does not  
4 exclude subjects with one or more missing measurements. The calculation of the required sample  
5 size is based on an approach presented by Stroup.<sup>(34)</sup> Information with respect to variability of the  
6 lymphoedema-specific QoL score and the correlation between the timepoints was obtained from two  
7 retrospective series (130 patients with arm oedema and 83 patients with leg oedema).

8  
9  
10 The following assumptions have been made for the comparison of the lymphoedema-specific QoL:

- 11 - Standard deviation (SD) of the lymphoedema-specific QoL equal to 20
- 12 - Correlation between the baseline and each of the follow-up measurements equal to 0.50
- 13 - Drop-out of 5%, 10%, 15% and 20% after 1 and 3 months, 6 months, 12 months and 18, 24 and  
14 36 months, respectively

15  
16  
17 To detect a difference of 15 points, which is a clinically important difference,<sup>(14, 15)</sup> 36 subjects are  
18 required per group ( $2 \times 2 \times 36 = 144$  subjects in total for the two trials) to have at least 90% power. If the  
19 number of subjects would be reached before the end of the planned recruitment period of 24M,  
20 recruitment will continue up to 45 subjects per group (180 subjects for the whole study) to obtain  
21 more precise information, especially on the set of secondary outcomes. If the number is not attained,  
22 the recruitment period will be prolonged.

23  
24  
25 The sample size estimation heavily depends on estimates of variability of the lymphoedema-specific  
26 QoL and the correlation with the baseline measurement. Therefore, after inclusion of 40 subjects per  
27 group the already available information will be used to verify if the assumptions were plausible (note  
28 however that there will be no information yet at the moment of the primary endpoint). If the  
29 observed standard deviation and correlations deviate from the assumed values such that the desired  
30 power level of 90% is not guaranteed anymore, an increase of the planned sample size will be  
31 considered (if feasible). At the moment of this blinded interim analysis for sample size re-estimation,  
32 the assumed dropout rates will also be verified. No interim analyses are planned to stop the study  
33 earlier for efficacy or futility, this to avoid loss of information on the secondary endpoints.

### 34 35 36 37 38 39 40 41 42 43 44 45 46 47 48 49 50 **Data analyses**

51  
52 Statistical analysis will comply with the Consolidated Standards of Reporting Trials (CONSORT)  
53 guidelines. Analysis will be conducted in a blinded way. The continuous data will be summarised  
54 using mean and SD and median and range values. Different analysis sets will be defined. The intent-  
55 to-treat analysis set (ITT) contains all randomised patients, grouped according to the allocated  
56 treatment. The modified intent-to-treat analysis set (mITT) contains all randomised patients grouped  
57  
58  
59  
60

1  
2  
3 according to the allocated treatment, but excluding patients who have withdrawn their consent to  
4 the randomised procedure. The as-treated analysis set also contains all randomised patients but  
5 grouping the patients according to their received treatment. The per-protocol analysis set contains  
6 all randomised patients who received the allocated treatment. The main analyses will be performed  
7 on the ITT analysis set. Results on the other analysis sets will be reported additionally.  
8  
9  
10  
11  
12

### 13 *Primary outcome*

- 14 • Lymphoedema specific QoL

15  
16 A constrained longitudinal data analysis (cLDA)(33) using the baseline measurement and the follow-  
17 up measurements after 1 month, 3 months, 6 months, 12 months and 18 months as outcome will be  
18 used to compare the mean lymphoedema specific QoL after 18 months based on a two-sided test  
19 with  $\alpha=0.05$ . The choice of the covariance structure for the five measurements will be based on  
20 the Aikake criterion.(35) Study site is added as a fixed factor in this model. For patients with a  
21 recurrence of cancer in the root of the limb, only observations before the recurrence are included.  
22 Since the analysis is only valid under the missing at random (MAR) assumption (the probability of a  
23 missing lymphoedema-specific QoL measurement does not depend on the unobserved value),  
24 sensitivity analyses will be performed allowing a non-missing at random (NMAR) mechanism. More  
25 specifically, starting from the MAR model, a jump-to-reference (JR) and tipping-point (TP) analysis  
26 will be applied.(36)  
27  
28  
29  
30  
31  
32  
33  
34  
35  
36

### 37 *Key secondary outcomes*

- 38 • Change of limb volume:

39  
40 For the arm/ hand volume, ratios of the volume of the ipsilateral versus the contralateral side will be  
41 calculated. A multivariate model for the longitudinal measured ratios (7 timepoints) will be used to  
42 compare (changes in) log-transformed ratios between both groups. A log transformation for the  
43 ratios is used since intervals between units are not equidistant. For the leg/ foot volume, the same  
44 model will be used but on the original measurements of the (most) affected limb instead of on the  
45 (log-transformed) ratios versus the contralateral side (since also patients with bilateral leg volume  
46 are included).  
47  
48  
49  
50  
51

- 52 • Duration of wearing the compression garment:

53 The same modelling approach will be used as for the primary outcome.  
54  
55  
56

### 57 *Other secondary outcomes*

1  
2  
3 Continuous outcomes will be analysed in a similar way as the primary outcome. Categorical (binary)  
4 data will be analysed using stratified  $\chi^2$  test and logistic regression models with general estimating  
5 equations (GEE) for repeatedly measured binary data. Adverse events and complications after  
6 surgery will be reported descriptively.  
7  
8  
9

10  
11  
12 This study has been designed to permit *economic analysis* in a later phase. If reconstructive surgery is  
13 deemed superior to no surgery (i.e. is clinically effective), the next step is to investigate its cost-  
14 effectiveness by determining the incremental cost-effectiveness ratio (ICER). To determine the ICER,  
15 the costs from a healthcare payer's perspective and from a societal perspective will be considered, as  
16 well as the effectiveness by using the EQ-5D-5L questionnaire. If reconstructive surgery is proven  
17 cost-effective, the budget impact will be calculated from a reimburse perspective.  
18  
19  
20  
21  
22

### 23 24 25 *Exploratory analyses*

26 Subgroup analyses for the primary outcome will be considered as a function of stage (stage 1 versus  
27 2a/ 2b), primary vs secondary lymphoedema, weight (normal weight (BMI  $\leq$  25) versus overweight  
28 (BMI  $>$  25)) and combination of reconstructive techniques (combination of LVA/ LNT versus only LVA  
29 or only LNT)  
30  
31

32  
33  
34 Moreover, a multivariable model will be constructed to predict the lymphoedema-specific QoL at 36  
35 months based on 14 baseline variables. For subjects with a missing lymphoedema-specific QoL at 36  
36 months, values will be imputed based on a multivariate longitudinal model for the lymphoedema-  
37 specific QoL measurements. A model reduction will be performed on a stacked dataset consisting of  
38 the multiple imputed data (at least 10 imputations), using a weighting scheme to account for the  
39 fraction of missing data in each covariate.<sup>(37)</sup> Considering the dropouts at 36 months, data for  
40 lymphoedema-specific QoL of 144 patients will be available.  
41  
42  
43  
44  
45  
46  
47  
48

### 49 **Data security and management**

50  
51 A study-specific Data Management Plan has been developed by the data management team.  
52 Participant data are stored on a secure database in accordance with the General Data Protection  
53 Regulations (2018). Data are de-identified and a unique trial identification number is used on all  
54 source documents. These source documents are being checked for completeness and congruity  
55 before data entry into REDCap. All trial documentation and data will be archived for at least 20 years  
56 after completion of the trial.  
57  
58  
59  
60

1  
2  
3 A Risk Assessment Plan has also been made with a summary of the concerns in the trial, how they  
4 were mitigated, the probability that this will occur and its impact. This finally leads to a risk score  
5 (low, medium, high, critical). The concerns with highest risks are discussed during the meeting of the  
6 Trial Steering Committee (during recruitment period: once each 6M; thereafter: once a year).  
7  
8  
9

### 10 11 12 13 **Trial monitoring**

14  
15 A separate Monitoring plan has been constructed and will be conducted periodically by trial monitors  
16 (independent from trial staff). The first monitoring visit at each site will be conducted within 4-8  
17 weeks following the baseline visit of the first study subject at that site. Thereafter, monitoring visits  
18 will be organized at mean intervals of 6 months during recruitment, and mean intervals of 12 months  
19 thereafter. The participating site will provide direct access to the trial data and to the corresponding  
20 source data and documents. The trial will be monitored to ensure that it is being conducted in  
21 compliance with GCP and current legislation, that written informed consent has been obtained  
22 correctly, that the trial procedures have been followed as shown in the protocol, and that the data  
23 have been recorded, for which the source data will be compared with the data recorded in REDCap.  
24  
25  
26  
27  
28  
29  
30  
31  
32

### 33 **ETHICS AND DISSEMINATION**

34  
35 The SurLym trial will be conducted in compliance with the principles of the Declaration of Helsinki,  
36 the principles of GCP and in accordance with all applicable regulatory requirements. Approval has  
37 been obtained for the study protocol, the informed consent forms and other related documents by  
38 the main Ethical Committee of UZ Leuven (S631212) and the local Ethical Committees of UZ Gent and  
39 CHU UCL Namur. Any subsequent protocol amendments will be submitted to the Ethical Committee.  
40 Furthermore, the study is approved by the Federal Agency for Medicines and Health Products  
41 (EudraCT: 2021-000397-29).  
42  
43  
44  
45  
46  
47  
48  
49

### 50 **Dissemination of results**

51  
52 The results of the study owned by the sponsor shall be disseminated as soon as possible after the  
53 end of the trial, by disclosing them to the public by appropriate means, including publications in  
54 peer-reviewed scientific journals and presentations at congresses and events. Open access will be  
55 ensured to all peer-reviewed scientific publications relating to the results of the study.  
56  
57  
58  
59  
60

### **Acknowledgements**

We are grateful to all medical doctors for referring potential participants for inclusion in the trial. We also want to thank the data management team and the representative of the clinical trial center of UZ Leuven for their support. Finally, we are thankful to the patients of the advisory board and to the independent expert for their valuable advises in the preparation phase and during the course of the trial.

### **Author contributions**

ND is the chief investigator of the SurLym trial. TDV is the trial manager. ND, CR, TD are the principle investigators of the 3 study sites. SF is the statistician. LG is expert in occupational medicine and will supervise the economic analysis (if executed). ND, AKH, ST, BBH, IF, VVB, TDC, MDS, CR, CM, JF, TD will perform the recruitment of patients. ST, KS, PF, MS, AB, BDP, LD will perform the surgical procedures and follow-up. AKH, JF, VVB, TDC, MDS are responsible for the clinical assessments (including lymphofluoroscopy and lymphoscintigraphy). GM, FK, AF, DD are the radiologists responsible for the lymph MRI an BK is a nuclear medicine physician responsible for the lymphoscintigraphy. JM, SS, GP, KVL are the independent experts in reconstructive lymphatic surgery and will verify the quality of the surgical procedures. ND drafted the manuscript. All authors contributed to the establishment of the protocol, revised the manuscript and provided input according to their area of expertise.

### **Funding statement**

This study (KCE19-1245) is an independent research study funded by the Belgian Health Care Knowledge Centre under the KCE Trials Programme. The views expressed in this publication are those of the author(s) and not necessarily those of Belgian Health Care Knowledge Centre.

### **Data statement**

Data will be available on reasonable request.

### **Competing interests**

1  
2  
3 None declared  
4  
5  
6  
7

## 8 **Ethics approval**

9  
10 Approval is obtained by the central Ethical Committee of the University Hospitals Leuven (S63212)  
11 and by the local Ethical Committees of UZ Gent (BC-09711) and CHU UCL Namur (43/2021).  
12  
13  
14  
15

## 16 **Figure legend**

17  
18 Figure 1 Flow diagram of the SurLym trial.  
19  
20  
21  
22

## 23 **Supplemental material**

24  
25 Appendix Overview of the different variables and outcomes in the SurLym trial, the assessment  
26 method and the description of the method  
27  
28  
29  
30  
31

## 32 **References**

- 33  
34  
35 1. Fu MR, Ridner SH, Hu SH, Stewart BR, Cormier JN, Armer JM. Psychosocial impact of  
36 lymphedema: a systematic review of literature from 2004 to 2011. *Psychooncology*.  
37 2013;22(7):1466-84.  
38 2. Mercier G, Pastor J, Moffatt C, Franks P, Quere I. LIMPRINT: Health-Related Quality of Life in  
39 Adult Patients with Chronic Edema. *Lymphat Res Biol*. 2019;17(2):163-7.  
40 3. Neubauer M, Schoberwalter D, Cenik F, Keilani M, Crevenna R. Lymphedema and  
41 employability - Review and results of a survey of Austrian experts. *Wien Klin Wochenschr*.  
42 2017;129(5-6):186-91.  
43 4. Damstra RJ, Halk AB. The Dutch lymphedema guidelines based on the International  
44 Classification of Functioning, Disability, and Health and the chronic care model. *J Vasc Surg Venous*  
45 *Lymphat Disord*. 2017;5(5):756-65.  
46 5. Executive Committee of the International Society of L. The diagnosis and treatment of  
47 peripheral lymphedema: 2020 Consensus Document of the International Society of Lymphology.  
48 *Lymphology*. 2020;53(1):3-19.  
49 6. Kung TA, Champaneria MC, Maki JH, Neligan PC. Current Concepts in the Surgical  
50 Management of Lymphedema. *Plast Reconstr Surg*. 2017;139(4):1003e-13e.  
51 7. Chang DW, Masia J, Garza R, 3rd, Skoracki R, Neligan PC. Lymphedema: Surgical and Medical  
52 Therapy. *Plast Reconstr Surg*. 2016;138(3 Suppl):209s-18s.  
53 8. Jeong HH, Yoon IA, Al-Shomer FM, Suh HP, Pak CJ, Neligan P, et al. Decompression of Axillary  
54 vein - An essential adjunct for advanced lymphedema. *Plast Reconstr Surg*. 2023.  
55 9. Gould DJ, Mehrara BJ, Neligan P, Cheng MH, Patel KM. Lymph node transplantation for the  
56 treatment of lymphedema. *J Surg Oncol*. 2018;118(5):736-42.  
57  
58  
59  
60



10. Markkula SP, Leung N, Allen VB, Furniss D. Surgical interventions for the prevention or treatment of lymphoedema after breast cancer treatment. *Cochrane Database Syst Rev*. 2019;2:Cd011433.
11. Dionyssiou D, Demiri E, Tsimponis A, Sarafis A, Mpalaris V, Tatsidou G, et al. A randomized control study of treating secondary stage II breast cancer-related lymphoedema with free lymph node transfer. *Breast Cancer Res Treat*. 2016;156(1):73-9.
12. De Vrieze T, Fripiat J, Deltombe T, Gebruers N, Tjalma WAA, Nevelsteen I, et al. Cross-cultural validation of the French version of the Lymphedema Functioning, Disability and Health Questionnaire for Upper Limb Lymphedema (Lymph-ICF-UL). *Disabil Rehabil*. 2020:1-8.
13. De Vrieze T, Gebruers N, Nevelsteen I, Tjalma WAA, Thomis S, De Groef A, et al. Responsiveness of the Lymphedema Functioning, Disability, and Health Questionnaire for Upper Limb Lymphedema in Patients with Breast Cancer-Related Lymphedema. *Lymphat Res Biol*. 2020.
14. De Vrieze T, Vos L, Gebruers N, De Groef A, Dams L, Van der Gucht E, et al. Revision of the Lymphedema Functioning, Disability and Health Questionnaire for Upper Limb Lymphedema (Lymph-ICF-UL): Reliability and Validity. *Lymphat Res Biol*. 2019;17(3):347-55.
15. Devoogdt N, De Groef A, Hendrickx A, Damstra RJ, Christiaansen A, Geraerts I, et al. Lymphedema Functioning, Disability and Health Questionnaire for Lower Limb Lymphedema (Lymph-ICF-LL): Reliability and Validity. *Physical therapy*. 2014.
16. Devoogdt N, Partsch H, Heroes AK, De Vrieze T, De Groef A, Geraerts I, et al. The ICC Compression Questionnaire: A Comprehensive Tool to Evaluate Compression Materials or Devices Applied in Subjects with Lymphedema or Chronic Venous Disease. *Lymphat Res Biol*. 2021.
17. EuroQol--a new facility for the measurement of health-related quality of life. *Health Policy*. 1990;16(3):199-208.
18. Reilly MC, Zbrozek AS, Dukes EM. The validity and reproducibility of a work productivity and activity impairment instrument. *Pharmacoeconomics*. 1993;4(5):353-65.
19. Goorts K, Vandenbroeck S, Vander Elst T, Rusu D, Du Bois M, Decuman S, et al. Quicksan assesses risk factors of long-term sickness absence: A cross-sectional (factorial) construct validation study. *PloS one*. 2019;14(1):e0210359.
20. Ainsworth BE, Macera CA, Jones DA, Reis JP, Addy CL, Bowles HR, et al. Comparison of the 2001 BRFSS and the IPAQ Physical Activity Questionnaires. *Med Sci Sports Exerc*. 2006;38(9):1584-92.
21. De Vrieze T, Gebruers N, Tjalma WA, Nevelsteen I, Thomis S, De Groef A, et al. What is the best method to determine excessive arm volume in patients with breast cancer-related lymphoedema in clinical practice? Reliability, time efficiency and clinical feasibility of five different methods. *Clin Rehabil*. 2019;33(7):1221-32.
22. Devoogdt N, Cavaggion C, Van der Gucht E, Dams L, De Groef A, Meeus M, et al. Reliability, Validity, and Feasibility of Water Displacement Method, Figure-of-Eight Method, and Circumference Measurements in Determination of Ankle and Foot Edema. *Lymphat Res Biol*. 2019;17(5):531-6.
23. Devoogdt N, Lemkens H, Geraerts I, Van Nuland I, Flour M, Coremans T, et al. A new device to measure upper limb circumferences: reliability and validity. *Int Angiol*. 2010;(in publication).
24. Hidding JT, Viehoff PB, Beurskens CH, van Laarhoven HW, Nijhuis-van der Sanden MW, van der Wees PJ. Measurement Properties of Instruments for Measuring of Lymphedema: Systematic Review. *Phys Ther*. 2016;96(12):1965-81.
25. Farrell K, Johnson A, Duncan H, Offenbacker T, Curry C. The intertester and intratester reliability of hand volumetrics. *J Hand Ther*. 2003;16(4):292-9.
26. Thomis S, Dams L, Fourneau I, De Vrieze T, Nevelsteen I, Neven P, et al. Correlation Between Clinical Assessment and Lymphofluoroscopy in Patients with Breast Cancer-Related Lymphedema: A Study of Concurrent Validity. *Lymphat Res Biol*. 2020.
27. Devoogdt N, Van den Wyngaert T, Bourgeois P, Lambrechts M, Van Kampen M, De Groef A, et al. Reproducibility of lymphoscintigraphic evaluation of the upper limb. *Lymphat Res Biol*. 2014;12(3):175-84.

- 1  
2  
3 28. Villa G, Campisi CC, Ryan M, Boccardo F, Di Summa P, Frascio M, et al. Procedural  
4 Recommendations for Lymphoscintigraphy in the Diagnosis of Peripheral Lymphedema: the Genoa  
5 Protocol. *Nucl Med Mol Imaging*. 2019;53(1):47-56.  
6  
7 29. Chan AW, Tetzlaff JM, Altman DG, Laupacis A, Gotzsche PC, Krleza-Jeric K, et al. SPIRIT 2013  
8 statement: defining standard protocol items for clinical trials. *Ann Intern Med*. 2013;158(3):200-7.  
9 30. Atkinson TM, Wagner JS, Basch E. Trustworthiness of Patient-Reported Outcomes in  
10 Unblinded Cancer Clinical Trials. *JAMA Oncol*. 2017;3(6):738-9.  
11 31. Chang DW, Dayan J, Greene AK, MacDonald JK, Masia J, Mehrara B, et al. Surgical Treatment  
12 of Lymphedema: A Systematic Review and Meta-Analysis of Controlled Trials. Results of a Consensus  
13 Conference. *Plast Reconstr Surg*. 2021;147(4):975-93.  
14 32. Devoogdt N, Van Kampen M, Geraerts I, Coremans T, Christiaens MR. Lymphoedema  
15 Functioning, Disability and Health questionnaire (Lymph-ICF): reliability and validity. *Phys Ther*.  
16 2011;91(6):944-57.  
17 33. Liang KY, Zeger S. Longitudinal data analysis of continuous and discrete responses for pre-  
18 post designs. *Sankhya: The Indian Journal of Statistics*. 2000;Series B 62:134-48.  
19 34. Stroup WW. Mixed model procedures to assess power, precision, and sample size in the  
20 design of experiments. : *Proc. Biopharmaceutical Section. Am. Stat. Assoc.*; 1999.  
21 35. Fitzmaurice GM. Longitudinal data analysis. Boca Raton: CRC Press; 2009. xiv, 618 p. p.  
22 36. Molenberghs G, Fitzmaurice GM, Kenward MG, Tsiatis AA, Verbeke G. Handbook of missing  
23 data methodology. Boca Raton: CRC Press, Taylor & Francis Group; 2015. xxiv, 574 pages p.  
24 37. Wood AM, White IR, Royston P. How should variable selection be performed with multiply  
25 imputed data? *Stat Med*. 2008;27:3227-46.  
26  
27  
28  
29  
30  
31  
32  
33  
34  
35  
36  
37  
38  
39  
40  
41  
42  
43  
44  
45  
46  
47  
48  
49  
50  
51  
52  
53  
54  
55  
56  
57  
58  
59  
60

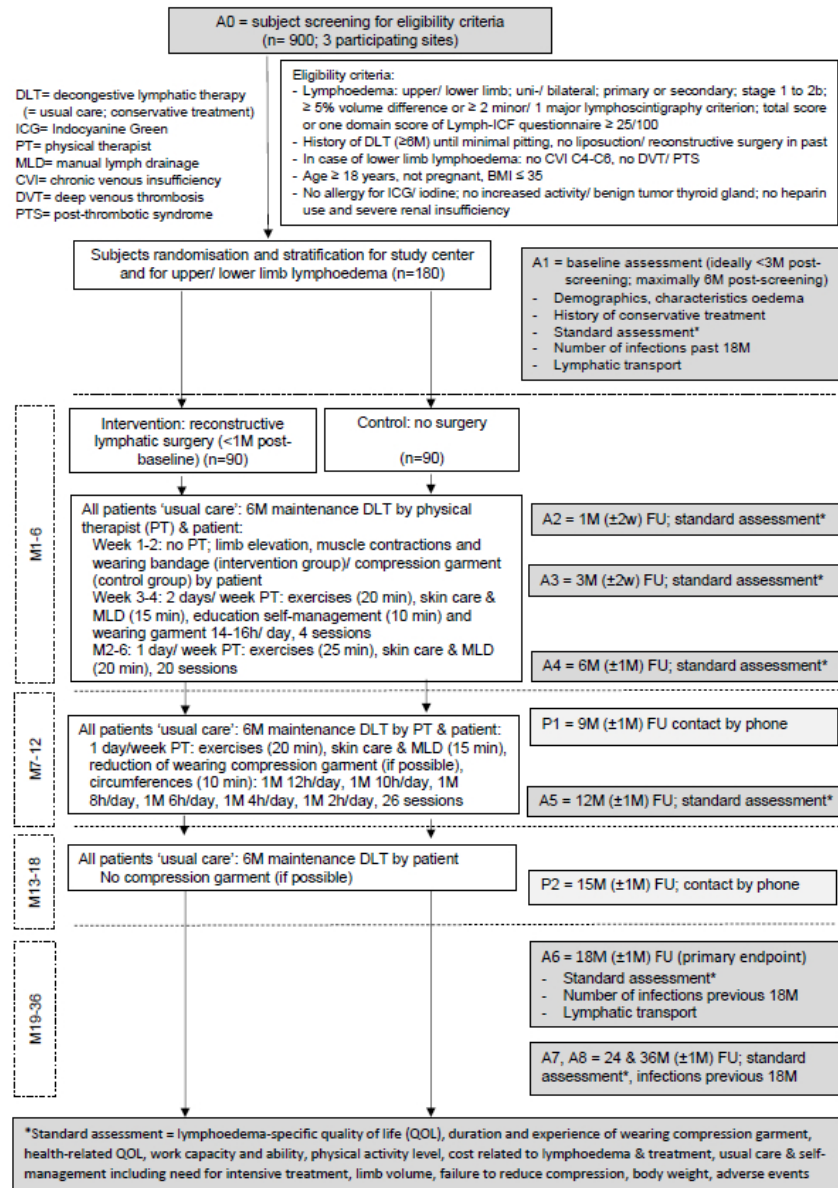

Figure 1. Flow diagram of SurLym trial

321x456mm (47 x 47 DPI)

## Appendix Overview of the different variables and outcomes in the SurLym trial, the assessment method and the description of the method

| Variable                                                                                                   | Assessment method; description of method                                                                                                                                                                                                                                                                                                 |
|------------------------------------------------------------------------------------------------------------|------------------------------------------------------------------------------------------------------------------------------------------------------------------------------------------------------------------------------------------------------------------------------------------------------------------------------------------|
| <b>Descriptives (15 min)</b>                                                                               |                                                                                                                                                                                                                                                                                                                                          |
| Demographics                                                                                               |                                                                                                                                                                                                                                                                                                                                          |
| Age (in years)                                                                                             | Medical file                                                                                                                                                                                                                                                                                                                             |
| Gender (man vs women),<br>smoking status (smoking vs<br>non-smoking), living status<br>(alone vs together) | Interview                                                                                                                                                                                                                                                                                                                                |
| Body height (in m)                                                                                         | Stadiometer                                                                                                                                                                                                                                                                                                                              |
| Comorbidity (yes vs no)                                                                                    | Self-reported questionnaire developed by IDEWE (= external institute for prevention and protection at work); presence of<br>wound by accident, of disease of musculoskeletal, circulatory, respiratory, neurological, digestive, urinary system, of<br>disease of blood or skin, of mental or metabolic problems or of tumor (yes vs no) |
| Educational level (low vs<br>high)                                                                         | Interview; lower education = primary and secondary school, higher education = non-university higher and university                                                                                                                                                                                                                       |
| Anxiety and depression (0-<br>42)                                                                          | Self-reported Hospital Anxiety and Depression Scale; 14 statements regarding anxiety and depression with score 0-3                                                                                                                                                                                                                       |

1  
2  
3  
4  
5  
6  
7  
8  
9  
10  
11  
12  
13  
14  
15  
16  
17  
18  
19  
20  
21  
22  
23  
24  
25  
26  
27  
28  
29  
30  
31  
32  
33  
34  
35  
36  
37  
38  
39  
40  
41  
42  
43  
44  
45  
46

Characteristics of  
lymphoedema and its  
treatment

Duration of lymphoedema  
(in months)

Interview

Localisation of  
lymphoedema (yes vs no)

Inspection; for upper limb lymphoedema: hand/ lower arm/ upper arm/ trunk or  
for lower limb lymphoedema: foot/ lower leg/ upper leg/ pelvic/ genital region, unilateral/ bilateral, site of lymphoedema  
followed in trial: left/ right

Pitting status (yes vs no)

Palpation; for upper limb lymphoedema: hand/ lower arm/ upper arm/ trunk or for lower limb lymphoedema: Foot/ lower  
leg/ upper leg/ pelvic/ genital region

Stage of lymphoedema (1  
vs 2a vs 2b)

Inspection en palpation; Stage 1= pitting oedema that disappears with limb elevation (= reversible), 2a= pitting oedema  
that does not disappear completely with limb elevation, 2b= further decrease of pitting and accumulation of fat tissue

Primary or secondary  
lymphoedema

Interview and medical file; Primary = congenital; secondary = acquired after cancer-treatment (and type of cancer),  
trauma, surgery, infection

History of conservative  
treatment

Self-reported questionnaire (developed by author); Information regarding 1) physical therapy: number of years, number of  
sessions last month/ year, content, 2) intensive treatment: where, how often, 3) other care giver, 4) self-management

---

**Primary outcome**

---

---

 Self-reported questionnaire

(5 min)

 Lymphoedema-specific  
 QoL (0-100)

 Lymph-ICF questionnaire Dutch or French version for upper or lower limb lymphoedema;(12-15) 28 and 29 questions on  
 11-point scale between 0-10, total score between 0-100 (0= no problems in functioning related to the development of  
 lymphoedema)

---

**Secondary outcomes**


---

## Self-reported questionnaires

(60 min)

 Lymphoedema-specific  
 QoL (0-100)

 See primary outcome; in addition, score on 5 domains, i.e. physical function, mental function, household, mobility and life  
 and social life domain (0-100)

 Duration (key secondary  
 outcome) and experience  
 of wearing compression  
 garment

 ICC compression questionnaire;(16) Dosage (0-168 hours/ week), application/ removing compression (0-10), comfort  
 (score between 0-10), complication (score between 0-10), general experience (0-10)

Health related QoL

 EuroQoL-5D-5L;(17) 5 items about mobility, self-care, activity, pain and anxiety (each dimension has 5 levels: no problems,  
 slight problems, moderate problems, severe problems and extreme problems), range between -0.33 for situation '33333'  
 (severe problems on all items) and 1 for situation '11111' (complete healthy)

Work capacity and ability

 Work Productivity and Activity Impairment questionnaire (WPAI-GH);(18) Impairment while working due to health, overall  
 work impairment due to health, activity impairment due to health (%)

|    |                         |                                                                                                                                                                 |
|----|-------------------------|-----------------------------------------------------------------------------------------------------------------------------------------------------------------|
| 1  |                         |                                                                                                                                                                 |
| 2  |                         |                                                                                                                                                                 |
| 3  |                         | QuickScan 18 – short version;(19) Chance for successful socio-professional reintegration (score between 0 certainly not                                         |
| 4  |                         | and 5 certainly yes)                                                                                                                                            |
| 5  |                         |                                                                                                                                                                 |
| 6  |                         |                                                                                                                                                                 |
| 7  | Physical activity level | International Physical Activity Questionnaire;(20) 7 questions about hours a week of vigorous (8 MET), moderate (4 MET)                                         |
| 8  | (MET-hours a week)      | and walking activities (3.3 MET), and sitting time                                                                                                              |
| 9  |                         |                                                                                                                                                                 |
| 10 |                         |                                                                                                                                                                 |
| 11 | Costs related to        | Study-specific questionnaire completed monthly by the patient; collection of patient and health care costs for material                                         |
| 12 | lymphoedema and its     | (such as compression or exercise material), medication, diagnostics or care giver (similar questionnaire as for Effort-BCRL                                     |
| 13 | treatment (in euro)     | trial)                                                                                                                                                          |
| 14 |                         |                                                                                                                                                                 |
| 15 |                         |                                                                                                                                                                 |
| 16 | Usual care & self-      |                                                                                                                                                                 |
| 17 | management §, including | Study-specific usual care & self-management questionnaire completed monthly by the patient; information regarding 1)                                            |
| 18 | need for intensive      | physical therapy: number of sessions, duration and content; 2) intensive treatment: where, number of sessions, content;                                         |
| 19 | treatment               | 3) other care giver; 4) self-management: number of days of each modality                                                                                        |
| 20 |                         |                                                                                                                                                                 |
| 21 |                         |                                                                                                                                                                 |
| 22 |                         |                                                                                                                                                                 |
| 23 |                         |                                                                                                                                                                 |
| 24 | Assessment (60 min)     |                                                                                                                                                                 |
| 25 |                         |                                                                                                                                                                 |
| 26 |                         |                                                                                                                                                                 |
| 27 |                         | Circumference measurements every 4 cm with perimeter;(21-24) limb volume is calculated with formula of truncated                                                |
| 28 | Limb volume (key        | cone, in participants with upper limb lymphoedema: assessment of affected and non-affected arm; outcome is excessive                                            |
| 29 | secondary outcome)      | arm volume (%) = (volume <sub>AFFECTED ARM</sub> – volume <sub>UNAFFECTED ARM</sub> / volume <sub>UNAFFECTED ARM</sub> ) x 100, in participants with lower limb |
| 30 |                         | lymphoedema: assessment of affected leg (= leg that is followed in trial); outcome is whole leg volume (in ml)                                                  |
| 31 |                         |                                                                                                                                                                 |
| 32 |                         |                                                                                                                                                                 |
| 33 |                         | Water displacement method of hand or foot;(22, 25) volume is the mass of the displaced water, in participants with upper                                        |
| 34 |                         | limb lymphoedema: assessment of affected and non-affected hand, outcome is excessive hand volume (%); in participants                                           |
| 35 | Hand/ foot volume       | with lower limb lymphoedema: assessment of affected foot, outcome is foot volume (in ml)                                                                        |
| 36 |                         |                                                                                                                                                                 |
| 37 |                         |                                                                                                                                                                 |
| 38 |                         |                                                                                                                                                                 |
| 39 |                         |                                                                                                                                                                 |
| 40 |                         |                                                                                                                                                                 |
| 41 |                         |                                                                                                                                                                 |
| 42 |                         |                                                                                                                                                                 |
| 43 |                         |                                                                                                                                                                 |
| 44 |                         |                                                                                                                                                                 |
| 45 |                         |                                                                                                                                                                 |
| 46 |                         |                                                                                                                                                                 |

|    |                             |                                                                                                                           |
|----|-----------------------------|---------------------------------------------------------------------------------------------------------------------------|
| 1  |                             |                                                                                                                           |
| 2  |                             |                                                                                                                           |
| 3  | Failure to reduce hours a   |                                                                                                                           |
| 4  | day of wearing              | Assessor determines whether participant is able to reduce the hours a day of wearing the compression garment as stated    |
| 5  | compression stocking (yes,  | by the protocol (see figure 1, M7-12); Not able = excessive arm volume/ leg volume increased more than the smallest real  |
| 6  | not able vs no, able)       | difference, i.e. 5% or more compared to baseline(14)                                                                      |
| 7  |                             |                                                                                                                           |
| 8  |                             |                                                                                                                           |
| 9  |                             |                                                                                                                           |
| 10 | Body weight (in kg)         | Scale                                                                                                                     |
| 11 |                             |                                                                                                                           |
| 12 | Infection previous 18       |                                                                                                                           |
| 13 | months (number)             | Interview                                                                                                                 |
| 14 |                             |                                                                                                                           |
| 15 | Recurrence of cancer (yes/  |                                                                                                                           |
| 16 | no)                         | Interview and medical file; only collected in the group with history of cancer                                            |
| 17 |                             |                                                                                                                           |
| 18 |                             |                                                                                                                           |
| 19 |                             |                                                                                                                           |
| 20 |                             |                                                                                                                           |
| 21 | Adverse events (whole       | Interview and medical file; registration of adverse events related to pre-surgical or study-specific investigations: ICG  |
| 22 | group) and complications    | fluoroscopy, lymphoscintigraphy, lymph MRI, CT angiography, of complications of reconstructive lymphatic surgery: 1) in   |
| 23 | of surgery (in intervention | general blue spot, wound healing problem, infection of wound, decrease of sensibility around wound, erysipelas of limb,   |
| 24 | group) (yes/ no)            | deep venous thrombosis, 2) LNT-specific seroma, lymphocele, donor site lymphoedema, loss of flap                          |
| 25 |                             |                                                                                                                           |
| 26 |                             |                                                                                                                           |
| 27 |                             |                                                                                                                           |
| 28 |                             | Study-specific questionnaire completed by the compression specialist after delivery of compression material; registration |
| 29 | Costs related to            | of company, compression product, region of compression, type, compression class, cost for health insurance/ patient       |
| 30 | lymphoedema and its         |                                                                                                                           |
| 31 | treatment (in euro)         | Inter Mutuality Agency (IMA) database (= agency collecting data from different mutual health insurance companies),        |
| 32 |                             | based on national number of the study participant                                                                         |
| 33 |                             |                                                                                                                           |
| 34 |                             |                                                                                                                           |
| 35 |                             |                                                                                                                           |
| 36 | Lymphatic transport         |                                                                                                                           |
| 37 |                             |                                                                                                                           |
| 38 |                             |                                                                                                                           |
| 39 |                             |                                                                                                                           |
| 40 |                             |                                                                                                                           |
| 41 |                             |                                                                                                                           |
| 42 |                             |                                                                                                                           |
| 43 |                             |                                                                                                                           |
| 44 |                             |                                                                                                                           |
| 45 |                             |                                                                                                                           |
| 46 |                             |                                                                                                                           |



1  
2  
3  
4  
5  
6 ICG fluoroscopy (60 min)  
7  
8  
9  
10  
11  
12  
13  
14  
15  
16  
17  
18  
19  
20  
21  
22  
23  
24  
25  
26  
27  
28  
29  
30  
31  
32  
33  
34  
35  
36  
37  
38  
39  
40  
41  
42  
43  
44  
45  
46

ICG fluoroscopy;(26) 0.2 ml dilution of ICG/ aqua/ NaCl is injected intradermally in 1<sup>st</sup> and 4<sup>th</sup> web of affected hand or foot; procedure consist of 3 minutes of rest, 5 minutes of stimulation and registration of outcomes (=early phase) and a break until 90 minutes post-injection and again registration of outcomes (= late phase); registration of following outcomes: 1) transport out of injection sites (yes/ no), 2) dermal rerouting (no, splash, stardust and diffuse for predefined regions on arm/ leg), 3) transport out of dermal rerouting, 4) lymph nodes (yes/ no)

Lymphoscintigraphy (60 min)

Lymphoscintigraphy;(27, 28) 55MBq <sup>99m</sup>Tc nanocolloids are injected intradermally in 1<sup>st</sup> web of both hands or feet; procedure consist of following steps: 1) 25 minutes of rest, 2) 5 minutes of arm/ leg cycling and 3) early phase acquisition; 4) 60 minutes break; 5) late phase acquisition; following images are made: before and after rest an image of injection sites and at the end (outcome: extraction out of injection sites in %), after rest, cycling and at the end a mini whole body (outcomes: number of lymph nodes, intensity of lymph collectors, intensity of dermal backflow, presence of lymph collaterals), during 25 minutes of rest dynamic images of axilla/ arm or groin/ leg (outcomes: arrival time and uptake in axilla/ inguinal region in %); in addition transport index is determined, based on transport kinetics, distribution of tracer, time to visualize lymph nodes and visualization of lymph nodes/ vessels

---

§ No secondary outcome

# Reporting checklist for protocol of a clinical trial.

Based on the SPIRIT guidelines.

## Instructions to authors

Complete this checklist by entering the page numbers from your manuscript where readers will find each of the items listed below.

Your article may not currently address all the items on the checklist. Please modify your text to include the missing information. If you are certain that an item does not apply, please write "n/a" and provide a short explanation.

Upload your completed checklist as an extra file when you submit to a journal.

In your methods section, say that you used the SPIRIT reporting guidelines, and cite them as:

Chan A-W, Tetzlaff JM, Gøtzsche PC, Altman DG, Mann H, Berlin J, Dickersin K, Hróbjartsson A, Schulz KF, Parulekar WR, Krleža-Jerić K, Laupacis A, Moher D. SPIRIT 2013 Explanation and Elaboration: Guidance for protocols of clinical trials. *BMJ*. 2013;346:e7586

Reporting Item

Page Number

### Administrative information

|       |                    |                                                                                                              |          |
|-------|--------------------|--------------------------------------------------------------------------------------------------------------|----------|
| Title | <a href="#">#1</a> | Descriptive title identifying the study design, population, interventions, and, if applicable, trial acronym | Paper p1 |
|-------|--------------------|--------------------------------------------------------------------------------------------------------------|----------|

For peer review only - <http://bmjopen.bmj.com/site/about/guidelines.xhtml>

|    |                              |                     |                                                                          |                  |
|----|------------------------------|---------------------|--------------------------------------------------------------------------|------------------|
| 1  | Trial registration           | <a href="#">#2a</a> | Trial identifier and registry name. If not yet registered, name of       | Paper p3         |
| 2  |                              |                     | intended registry                                                        |                  |
| 3  |                              |                     |                                                                          |                  |
| 4  |                              |                     |                                                                          |                  |
| 5  |                              |                     |                                                                          |                  |
| 6  | Trial registration: data set | <a href="#">#2b</a> | All items from the World Health Organization Trial Registration Data     | Paper p3         |
| 7  |                              |                     | Set                                                                      |                  |
| 8  |                              |                     |                                                                          |                  |
| 9  |                              |                     |                                                                          |                  |
| 10 |                              |                     |                                                                          |                  |
| 11 | Protocol version             | <a href="#">#3</a>  | Date and version identifier                                              | Paper p3         |
| 12 |                              |                     |                                                                          |                  |
| 13 |                              |                     |                                                                          |                  |
| 14 |                              |                     |                                                                          |                  |
| 15 | Funding                      | <a href="#">#4</a>  | Sources and types of financial, material, and other support              | Paper p3, study  |
| 16 |                              |                     |                                                                          | agreement KCE-UZ |
| 17 |                              |                     |                                                                          | Leuven           |
| 18 |                              |                     |                                                                          |                  |
| 19 |                              |                     |                                                                          |                  |
| 20 |                              |                     |                                                                          |                  |
| 21 |                              |                     |                                                                          |                  |
| 22 | Roles and responsibilities:  | <a href="#">#5a</a> | Names, affiliations, and roles of protocol contributors                  | Paper p30        |
| 23 | contributorship              |                     |                                                                          |                  |
| 24 |                              |                     |                                                                          |                  |
| 25 |                              |                     |                                                                          |                  |
| 26 |                              |                     |                                                                          |                  |
| 27 |                              |                     |                                                                          |                  |
| 28 | Roles and responsibilities:  | <a href="#">#5b</a> | Name and contact information for the trial sponsor                       | Paper p3         |
| 29 | sponsor contact              |                     |                                                                          |                  |
| 30 |                              |                     |                                                                          |                  |
| 31 |                              |                     |                                                                          |                  |
| 32 | information                  |                     |                                                                          |                  |
| 33 |                              |                     |                                                                          |                  |
| 34 |                              |                     |                                                                          |                  |
| 35 |                              |                     |                                                                          |                  |
| 36 | Roles and responsibilities:  | <a href="#">#5c</a> | Role of study sponsor and funders, if any, in study design; collection,  | Protocol v3.0 p9 |
| 37 | sponsor and funder           |                     | management, analysis, and interpretation of data; writing of the         |                  |
| 38 |                              |                     | report; and the decision to submit the report for publication, including |                  |
| 39 |                              |                     | whether they will have ultimate authority over any of these activities   |                  |
| 40 |                              |                     |                                                                          |                  |
| 41 |                              |                     |                                                                          |                  |
| 42 |                              |                     |                                                                          |                  |
| 43 |                              |                     |                                                                          |                  |
| 44 |                              |                     |                                                                          |                  |
| 45 |                              |                     |                                                                          |                  |
| 46 |                              |                     |                                                                          |                  |
| 47 |                              |                     |                                                                          |                  |

1 Roles and responsibilities: [#5d](#) Composition, roles, and responsibilities of the coordinating centre, Protocol v3.0 p10  
2 committees  
3 steering committee, endpoint adjudication committee, data  
4 management team, and other individuals or groups overseeing the  
5 trial, if applicable (see Item 21a for data monitoring committee)  
6  
7  
8  
9

## 10 Introduction

11  
12  
13  
14 Background and rationale [#6a](#) Description of research question and justification for undertaking the Paper p7  
15 trial, including summary of relevant studies (published and  
16 unpublished) examining benefits and harms for each intervention  
17  
18  
19

20  
21  
22 Background and rationale: [#6b](#) Explanation for choice of comparators Paper p6  
23 choice of comparators  
24  
25  
26

27 Objectives [#7](#) Specific objectives or hypotheses Paper p7  
28  
29

30 Trial design [#8](#) Description of trial design including type of trial (eg, parallel group, Paper p9  
31 crossover, factorial, single group), allocation ratio, and framework  
32 (eg, superiority, equivalence, non-inferiority, exploratory)  
33  
34  
35  
36  
37

38 **Methods: Participants,**  
39  
40 **interventions, and**  
41  
42 **outcomes**  
43  
44

|    |                            |                      |                                                                           |                          |
|----|----------------------------|----------------------|---------------------------------------------------------------------------|--------------------------|
| 1  | Study setting              | <a href="#">#9</a>   | Description of study settings (eg, community clinic, academic             | Paper p9                 |
| 2  |                            |                      | hospital) and list of countries where data will be collected. Reference   |                          |
| 3  |                            |                      | to where list of study sites can be obtained                              |                          |
| 4  |                            |                      |                                                                           |                          |
| 5  |                            |                      |                                                                           |                          |
| 6  |                            |                      |                                                                           |                          |
| 7  |                            |                      |                                                                           |                          |
| 8  | Eligibility criteria       | <a href="#">#10</a>  | Inclusion and exclusion criteria for participants. If applicable,         | Paper p10-11             |
| 9  |                            |                      | eligibility criteria for study centres and individuals who will perform   |                          |
| 10 |                            |                      | the interventions (eg, surgeons, psychotherapists)                        |                          |
| 11 |                            |                      |                                                                           |                          |
| 12 |                            |                      |                                                                           |                          |
| 13 |                            |                      |                                                                           |                          |
| 14 |                            |                      |                                                                           |                          |
| 15 |                            |                      |                                                                           |                          |
| 16 | Interventions: description | <a href="#">#11a</a> | Interventions for each group with sufficient detail to allow replication, | Paper p13-18             |
| 17 |                            |                      | including how and when they will be administered                          |                          |
| 18 |                            |                      |                                                                           |                          |
| 19 |                            |                      |                                                                           |                          |
| 20 |                            |                      |                                                                           |                          |
| 21 |                            |                      |                                                                           |                          |
| 22 | Interventions:             | <a href="#">#11b</a> | Criteria for discontinuing or modifying allocated interventions for a     | Paper p13                |
| 23 | modifications              |                      | given trial participant (eg, drug dose change in response to harms,       |                          |
| 24 |                            |                      | participant request, or improving / worsening disease)                    |                          |
| 25 |                            |                      |                                                                           |                          |
| 26 |                            |                      |                                                                           |                          |
| 27 |                            |                      |                                                                           |                          |
| 28 |                            |                      |                                                                           |                          |
| 29 | Interventions: adherence   | <a href="#">#11c</a> | Strategies to improve adherence to intervention protocols, and any        | Paper p19, Protocol v3.0 |
| 30 |                            |                      | procedures for monitoring adherence (eg, drug tablet return;              | p44                      |
| 31 |                            |                      | laboratory tests)                                                         |                          |
| 32 |                            |                      |                                                                           |                          |
| 33 |                            |                      |                                                                           |                          |
| 34 |                            |                      |                                                                           |                          |
| 35 |                            |                      |                                                                           |                          |
| 36 |                            |                      |                                                                           |                          |
| 37 | Interventions: concomitant | <a href="#">#11d</a> | Relevant concomitant care and interventions that are permitted or         | Paper p18                |
| 38 | care                       |                      | prohibited during the trial                                               |                          |
| 39 |                            |                      |                                                                           |                          |
| 40 |                            |                      |                                                                           |                          |
| 41 |                            |                      |                                                                           |                          |
| 42 |                            |                      |                                                                           |                          |
| 43 |                            |                      |                                                                           |                          |
| 44 |                            |                      |                                                                           |                          |
| 45 |                            |                      |                                                                           |                          |
| 46 |                            |                      |                                                                           |                          |
| 47 |                            |                      |                                                                           |                          |

|    |                      |                     |                                                                       |               |
|----|----------------------|---------------------|-----------------------------------------------------------------------|---------------|
| 1  | Outcomes             | <a href="#">#12</a> | Primary, secondary, and other outcomes, including the specific        | Paper p19-25  |
| 2  |                      |                     |                                                                       |               |
| 3  |                      |                     |                                                                       |               |
| 4  |                      |                     | measurement variable (eg, systolic blood pressure), analysis metric   |               |
| 5  |                      |                     |                                                                       |               |
| 6  |                      |                     | (eg, change from baseline, final value, time to event), method of     |               |
| 7  |                      |                     |                                                                       |               |
| 8  |                      |                     | aggregation (eg, median, proportion), and time point for each         |               |
| 9  |                      |                     |                                                                       |               |
| 10 |                      |                     | outcome. Explanation of the clinical relevance of chosen efficacy and |               |
| 11 |                      |                     |                                                                       |               |
| 12 |                      |                     | harm outcomes is strongly recommended                                 |               |
| 13 |                      |                     |                                                                       |               |
| 14 |                      |                     |                                                                       |               |
| 15 |                      |                     |                                                                       |               |
| 16 | Participant timeline | <a href="#">#13</a> | Time schedule of enrolment, interventions (including any run-ins and  | Paper figure1 |
| 17 |                      |                     | washouts), assessments, and visits for participants. A schematic      |               |
| 18 |                      |                     | diagram is highly recommended (see Figure)                            |               |
| 19 |                      |                     |                                                                       |               |
| 20 |                      |                     |                                                                       |               |
| 21 |                      |                     |                                                                       |               |
| 22 |                      |                     |                                                                       |               |
| 23 | Sample size          | <a href="#">#14</a> | Estimated number of participants needed to achieve study objectives   | Paper p26     |
| 24 |                      |                     | and how it was determined, including clinical and statistical         |               |
| 25 |                      |                     | assumptions supporting any sample size calculations                   |               |
| 26 |                      |                     |                                                                       |               |
| 27 |                      |                     |                                                                       |               |
| 28 |                      |                     |                                                                       |               |
| 29 |                      |                     |                                                                       |               |
| 30 |                      |                     |                                                                       |               |
| 31 | Recruitment          | <a href="#">#15</a> | Strategies for achieving adequate participant enrolment to reach      | Paper p11-12  |
| 32 |                      |                     | target sample size                                                    |               |
| 33 |                      |                     |                                                                       |               |
| 34 |                      |                     |                                                                       |               |
| 35 |                      |                     |                                                                       |               |

36 **Methods: Assignment of**  
37  
38 **interventions (for**  
39  
40 **controlled trials)**  
41

|                                                                               |                                                 |                      |                                                                                                                                                                                                                                                                                                                                                                 |                  |
|-------------------------------------------------------------------------------|-------------------------------------------------|----------------------|-----------------------------------------------------------------------------------------------------------------------------------------------------------------------------------------------------------------------------------------------------------------------------------------------------------------------------------------------------------------|------------------|
| 1<br>2<br>3<br>4<br>5<br>6<br>7<br>8<br>9<br>10<br>11<br>12<br>13<br>14<br>15 | Allocation: sequence<br><br>generation          | <a href="#">#16a</a> | Method of generating the allocation sequence (eg, computer-generated random numbers), and list of any factors for stratification.<br><br>To reduce predictability of a random sequence, details of any planned restriction (eg, blocking) should be provided in a separate document that is unavailable to those who enrol participants or assign interventions | Paper p12        |
| 16<br>17<br>18<br>19<br>20<br>21<br>22<br>23<br>24                            | Allocation concealment<br><br>mechanism         | <a href="#">#16b</a> | Mechanism of implementing the allocation sequence (eg, central telephone; sequentially numbered, opaque, sealed envelopes), describing any steps to conceal the sequence until interventions are assigned                                                                                                                                                       | Paper p12        |
| 26<br>27<br>28<br>29<br>30                                                    | Allocation: implementation                      | <a href="#">#16c</a> | Who will generate the allocation sequence, who will enrol participants, and who will assign participants to interventions                                                                                                                                                                                                                                       | Paper p12        |
| 31<br>32<br>33<br>34<br>35<br>36<br>37                                        | Blinding (masking)                              | <a href="#">#17a</a> | Who will be blinded after assignment to interventions (eg, trial participants, care providers, outcome assessors, data analysts), and how                                                                                                                                                                                                                       | Paper p12        |
| 39<br>40<br>41<br>42<br>43<br>44                                              | Blinding (masking):<br><br>emergency unblinding | <a href="#">#17b</a> | If blinded, circumstances under which unblinding is permissible, and procedure for revealing a participant’s allocated intervention during the trial                                                                                                                                                                                                            | N/A, no blinding |

1 **Methods: Data collection,**  
 2  
 3 **management, and analysis**  
 4

|                                                                                         |                                    |                      |                                                                                                                                                                                                                                                                                                                                                                                                              |                                         |
|-----------------------------------------------------------------------------------------|------------------------------------|----------------------|--------------------------------------------------------------------------------------------------------------------------------------------------------------------------------------------------------------------------------------------------------------------------------------------------------------------------------------------------------------------------------------------------------------|-----------------------------------------|
| 5<br>6<br>7<br>8<br>9<br>10<br>11<br>12<br>13<br>14<br>15<br>16<br>17<br>18<br>19<br>20 | Data collection plan               | <a href="#">#18a</a> | Plans for assessment and collection of outcome, baseline, and other trial data, including any related processes to promote data quality (eg, duplicate measurements, training of assessors) and a description of study instruments (eg, questionnaires, laboratory tests) along with their reliability and validity, if known. Reference to where data collection forms can be found, if not in the protocol | Data management plan v2.0               |
| 21<br>22<br>23<br>24<br>25<br>26<br>27<br>28                                            | Data collection plan:<br>retention | <a href="#">#18b</a> | Plans to promote participant retention and complete follow-up, including list of any outcome data to be collected for participants who discontinue or deviate from intervention protocols                                                                                                                                                                                                                    | Paper p29, Risk assessment plan v1 p8-9 |
| 29<br>30<br>31<br>32<br>33<br>34<br>35<br>36<br>37                                      | Data management                    | <a href="#">#19</a>  | Plans for data entry, coding, security, and storage, including any related processes to promote data quality (eg, double data entry; range checks for data values). Reference to where details of data management procedures can be found, if not in the protocol                                                                                                                                            | Data management plan v2.0               |
| 38<br>39<br>40<br>41<br>42<br>43<br>44                                                  | Statistics: outcomes               | <a href="#">#20a</a> | Statistical methods for analysing primary and secondary outcomes. Reference to where other details of the statistical analysis plan can be found, if not in the protocol                                                                                                                                                                                                                                     | Paper p27-28                            |



|    |                            |                      |                                                                      |                       |
|----|----------------------------|----------------------|----------------------------------------------------------------------|-----------------------|
| 1  | Statistics: additional     | <a href="#">#20b</a> | Methods for any additional analyses (eg, subgroup and adjusted       | Paper p27-28          |
| 2  |                            |                      |                                                                      |                       |
| 3  | analyses                   |                      | analyses)                                                            |                       |
| 4  |                            |                      |                                                                      |                       |
| 5  |                            |                      |                                                                      |                       |
| 6  | Statistics: analysis       | <a href="#">#20c</a> | Definition of analysis population relating to protocol non-adherence | Paper p27             |
| 7  |                            |                      |                                                                      |                       |
| 8  | population and missing     |                      | (eg, as randomised analysis), and any statistical methods to handle  |                       |
| 9  |                            |                      |                                                                      |                       |
| 10 | data                       |                      | missing data (eg, multiple imputation)                               |                       |
| 11 |                            |                      |                                                                      |                       |
| 12 |                            |                      |                                                                      |                       |
| 13 |                            |                      |                                                                      |                       |
| 14 | <b>Methods: Monitoring</b> |                      |                                                                      |                       |
| 15 |                            |                      |                                                                      |                       |
| 16 |                            |                      |                                                                      |                       |
| 17 | Data monitoring: formal    | <a href="#">#21a</a> | Composition of data monitoring committee (DMC); summary of its       | Paper p29             |
| 18 |                            |                      |                                                                      |                       |
| 19 | committee                  |                      | role and reporting structure; statement of whether it is independent |                       |
| 20 |                            |                      |                                                                      |                       |
| 21 |                            |                      |                                                                      |                       |
| 22 |                            |                      |                                                                      |                       |
| 23 |                            |                      |                                                                      |                       |
| 24 |                            |                      |                                                                      |                       |
| 25 |                            |                      |                                                                      |                       |
| 26 |                            |                      |                                                                      |                       |
| 27 |                            |                      |                                                                      |                       |
| 28 |                            |                      |                                                                      |                       |
| 29 | Data monitoring: interim   | <a href="#">#21b</a> | Description of any interim analyses and stopping guidelines,         | Paper p26             |
| 30 |                            |                      |                                                                      |                       |
| 31 | analysis                   |                      | including who will have access to these interim results and make the |                       |
| 32 |                            |                      |                                                                      |                       |
| 33 |                            |                      |                                                                      |                       |
| 34 |                            |                      |                                                                      |                       |
| 35 |                            |                      |                                                                      |                       |
| 36 |                            |                      |                                                                      |                       |
| 37 | Harms                      | <a href="#">#22</a>  | Plans for collecting, assessing, reporting, and managing solicited   | Protocol v3.0 p46-47; |
| 38 |                            |                      |                                                                      |                       |
| 39 |                            |                      |                                                                      |                       |
| 40 |                            |                      |                                                                      |                       |
| 41 |                            |                      |                                                                      |                       |
| 42 |                            |                      |                                                                      |                       |
| 43 |                            |                      |                                                                      |                       |
| 44 |                            |                      |                                                                      |                       |
| 45 |                            |                      |                                                                      |                       |
| 46 |                            |                      |                                                                      |                       |
| 47 |                            |                      |                                                                      |                       |

|    |                                 |                      |                                                                                                                                                                                                                                    |                                      |
|----|---------------------------------|----------------------|------------------------------------------------------------------------------------------------------------------------------------------------------------------------------------------------------------------------------------|--------------------------------------|
| 1  | Auditing                        | <a href="#">#23</a>  | Frequency and procedures for auditing trial conduct, if any, and whether the process will be independent from investigators and the sponsor                                                                                        | Paper p29                            |
| 2  |                                 |                      |                                                                                                                                                                                                                                    |                                      |
| 3  |                                 |                      |                                                                                                                                                                                                                                    |                                      |
| 4  |                                 |                      |                                                                                                                                                                                                                                    |                                      |
| 5  |                                 |                      |                                                                                                                                                                                                                                    |                                      |
| 6  |                                 |                      |                                                                                                                                                                                                                                    |                                      |
| 7  |                                 |                      |                                                                                                                                                                                                                                    |                                      |
| 8  |                                 |                      |                                                                                                                                                                                                                                    |                                      |
| 9  | <b>Ethics and dissemination</b> |                      |                                                                                                                                                                                                                                    |                                      |
| 10 |                                 |                      |                                                                                                                                                                                                                                    |                                      |
| 11 |                                 |                      |                                                                                                                                                                                                                                    |                                      |
| 12 | Research ethics approval        | <a href="#">#24</a>  | Plans for seeking research ethics committee / institutional review board (REC / IRB) approval                                                                                                                                      | Protocol v3.0 p57                    |
| 13 |                                 |                      |                                                                                                                                                                                                                                    |                                      |
| 14 |                                 |                      |                                                                                                                                                                                                                                    |                                      |
| 15 |                                 |                      |                                                                                                                                                                                                                                    |                                      |
| 16 |                                 |                      |                                                                                                                                                                                                                                    |                                      |
| 17 | Protocol amendments             | <a href="#">#25</a>  | Plans for communicating important protocol modifications (eg, changes to eligibility criteria, outcomes, analyses) to relevant parties (eg, investigators, REC / IRBs, trial participants, trial registries, journals, regulators) | Protocol v3.0 p57                    |
| 18 |                                 |                      |                                                                                                                                                                                                                                    |                                      |
| 19 |                                 |                      |                                                                                                                                                                                                                                    |                                      |
| 20 |                                 |                      |                                                                                                                                                                                                                                    |                                      |
| 21 |                                 |                      |                                                                                                                                                                                                                                    |                                      |
| 22 |                                 |                      |                                                                                                                                                                                                                                    |                                      |
| 23 |                                 |                      |                                                                                                                                                                                                                                    |                                      |
| 24 |                                 |                      |                                                                                                                                                                                                                                    |                                      |
| 25 |                                 |                      |                                                                                                                                                                                                                                    |                                      |
| 26 |                                 |                      |                                                                                                                                                                                                                                    |                                      |
| 27 | Consent or assent               | <a href="#">#26a</a> | Who will obtain informed consent or assent from potential trial participants or authorised surrogates, and how (see Item 32)                                                                                                       | Paper p11-12, Protocol v3.0 p33      |
| 28 |                                 |                      |                                                                                                                                                                                                                                    |                                      |
| 29 |                                 |                      |                                                                                                                                                                                                                                    |                                      |
| 30 |                                 |                      |                                                                                                                                                                                                                                    |                                      |
| 31 |                                 |                      |                                                                                                                                                                                                                                    |                                      |
| 32 | Consent or assent:              | <a href="#">#26b</a> | Additional consent provisions for collection and use of participant data and biological specimens in ancillary studies, if applicable                                                                                              | N/A                                  |
| 33 | ancillary studies               |                      |                                                                                                                                                                                                                                    |                                      |
| 34 |                                 |                      |                                                                                                                                                                                                                                    |                                      |
| 35 |                                 |                      |                                                                                                                                                                                                                                    |                                      |
| 36 |                                 |                      |                                                                                                                                                                                                                                    |                                      |
| 37 |                                 |                      |                                                                                                                                                                                                                                    |                                      |
| 38 | Confidentiality                 | <a href="#">#27</a>  | How personal information about potential and enrolled participants will be collected, shared, and maintained in order to protect confidentiality before, during, and after the trial                                               | Paper p29, Data Management Plan p6-7 |
| 39 |                                 |                      |                                                                                                                                                                                                                                    |                                      |
| 40 |                                 |                      |                                                                                                                                                                                                                                    |                                      |
| 41 |                                 |                      |                                                                                                                                                                                                                                    |                                      |
| 42 |                                 |                      |                                                                                                                                                                                                                                    |                                      |
| 43 |                                 |                      |                                                                                                                                                                                                                                    |                                      |
| 44 |                                 |                      |                                                                                                                                                                                                                                    |                                      |
| 45 |                                 |                      |                                                                                                                                                                                                                                    |                                      |
| 46 |                                 |                      |                                                                                                                                                                                                                                    |                                      |
| 47 |                                 |                      |                                                                                                                                                                                                                                    |                                      |

|    |                               |                      |                                                                         |                          |
|----|-------------------------------|----------------------|-------------------------------------------------------------------------|--------------------------|
| 1  | Declaration of interests      | <a href="#">#28</a>  | Financial and other competing interests for principal investigators for | Paper p30                |
| 2  |                               |                      |                                                                         |                          |
| 3  |                               |                      | the overall trial and each study site                                   |                          |
| 4  |                               |                      |                                                                         |                          |
| 5  |                               |                      |                                                                         |                          |
| 6  | Data access                   | <a href="#">#29</a>  | Statement of who will have access to the final trial dataset, and       | Data Management Plan     |
| 7  |                               |                      |                                                                         |                          |
| 8  |                               |                      | disclosure of contractual agreements that limit such access for         | p3-4                     |
| 9  |                               |                      |                                                                         |                          |
| 10 |                               |                      | investigators                                                           |                          |
| 11 |                               |                      |                                                                         |                          |
| 12 |                               |                      |                                                                         |                          |
| 13 |                               |                      |                                                                         |                          |
| 14 | Ancillary and post trial care | <a href="#">#30</a>  | Provisions, if any, for ancillary and post-trial care, and for          | Not specified            |
| 15 |                               |                      |                                                                         |                          |
| 16 |                               |                      | compensation to those who suffer harm from trial participation          |                          |
| 17 |                               |                      |                                                                         |                          |
| 18 |                               |                      |                                                                         |                          |
| 19 | Dissemination policy: trial   | <a href="#">#31a</a> | Plans for investigators and sponsor to communicate trial results to     | Paper p30, Protocol v3.0 |
| 20 |                               |                      |                                                                         |                          |
| 21 | results                       |                      | participants, healthcare professionals, the public, and other relevant  | p61                      |
| 22 |                               |                      |                                                                         |                          |
| 23 |                               |                      | groups (eg, via publication, reporting in results databases, or other   |                          |
| 24 |                               |                      |                                                                         |                          |
| 25 |                               |                      | data sharing arrangements), including any publication restrictions      |                          |
| 26 |                               |                      |                                                                         |                          |
| 27 |                               |                      |                                                                         |                          |
| 28 |                               |                      |                                                                         |                          |
| 29 | Dissemination policy:         | <a href="#">#31b</a> | Authorship eligibility guidelines and any intended use of professional  | Protocol v3.0 p61, study |
| 30 |                               |                      |                                                                         |                          |
| 31 | authorship                    |                      | writers                                                                 | agreement sponsor-study  |
| 32 |                               |                      |                                                                         |                          |
| 33 |                               |                      |                                                                         | site                     |
| 34 |                               |                      |                                                                         |                          |
| 35 |                               |                      |                                                                         |                          |
| 36 |                               |                      |                                                                         |                          |
| 37 | Dissemination policy:         | <a href="#">#31c</a> | Plans, if any, for granting public access to the full protocol,         | Protocol v3.0 p61        |
| 38 |                               |                      |                                                                         |                          |
| 39 | reproducible research         |                      | participant-level dataset, and statistical code                         |                          |
| 40 |                               |                      |                                                                         |                          |
| 41 |                               |                      |                                                                         |                          |
| 42 |                               |                      |                                                                         |                          |
| 43 | <b>Appendices</b>             |                      |                                                                         |                          |
| 44 |                               |                      |                                                                         |                          |
| 45 |                               |                      |                                                                         |                          |
| 46 |                               |                      |                                                                         |                          |
| 47 |                               |                      |                                                                         |                          |

|                                            |                            |                     |                                                                                                                                                                                                |                                                               |
|--------------------------------------------|----------------------------|---------------------|------------------------------------------------------------------------------------------------------------------------------------------------------------------------------------------------|---------------------------------------------------------------|
| 1<br>2<br>3<br>4<br>5<br>6<br>7            | Informed consent materials | <a href="#">#32</a> | Model consent form and other related documentation given to participants and authorised surrogates                                                                                             | In TMF Informed Consent Form v6.0 in Dutch and v5.0 in French |
| 8<br>9<br>10<br>11<br>12<br>13<br>14<br>15 | Biological specimens       | <a href="#">#33</a> | Plans for collection, laboratory evaluation, and storage of biological specimens for genetic or molecular analysis in the current trial and for future use in ancillary studies, if applicable | N/A                                                           |

16  
17  
18  
19  
20  
21  
22  
23  
24  
25  
26  
27  
28  
29  
30  
31  
32  
33  
34  
35  
36  
37  
38  
39  
40  
41  
42  
43  
44  
45  
46  
47

None The SPIRIT Explanation and Elaboration paper is distributed under the terms of the Creative Commons Attribution License CC-BY-NC. This checklist can be completed online using <https://www.goodreports.org/>, a tool made by the [EQUATOR Network](#) in collaboration with [Penelope.ai](#)

# BMJ Open

## SurLym trial: Study protocol for a multicentre pragmatic randomised controlled trial on the added value of reconstructive lymphatic surgery to decongestive lymphatic therapy for the treatment of lymphoedema

|                               |                                                                                                                                                                                                                                                                                                                                                                                                                                                                                                                                                                                                                                                                                                                                                                                                                                                                                                                                                                                                                                                                                                                                                                                                                                                                                                                                                                                                                                                                                                                                                                                                                                                                                                                                                                                                              |
|-------------------------------|--------------------------------------------------------------------------------------------------------------------------------------------------------------------------------------------------------------------------------------------------------------------------------------------------------------------------------------------------------------------------------------------------------------------------------------------------------------------------------------------------------------------------------------------------------------------------------------------------------------------------------------------------------------------------------------------------------------------------------------------------------------------------------------------------------------------------------------------------------------------------------------------------------------------------------------------------------------------------------------------------------------------------------------------------------------------------------------------------------------------------------------------------------------------------------------------------------------------------------------------------------------------------------------------------------------------------------------------------------------------------------------------------------------------------------------------------------------------------------------------------------------------------------------------------------------------------------------------------------------------------------------------------------------------------------------------------------------------------------------------------------------------------------------------------------------|
| Journal:                      | <i>BMJ Open</i>                                                                                                                                                                                                                                                                                                                                                                                                                                                                                                                                                                                                                                                                                                                                                                                                                                                                                                                                                                                                                                                                                                                                                                                                                                                                                                                                                                                                                                                                                                                                                                                                                                                                                                                                                                                              |
| Manuscript ID                 | bmjopen-2023-078114.R2                                                                                                                                                                                                                                                                                                                                                                                                                                                                                                                                                                                                                                                                                                                                                                                                                                                                                                                                                                                                                                                                                                                                                                                                                                                                                                                                                                                                                                                                                                                                                                                                                                                                                                                                                                                       |
| Article Type:                 | Protocol                                                                                                                                                                                                                                                                                                                                                                                                                                                                                                                                                                                                                                                                                                                                                                                                                                                                                                                                                                                                                                                                                                                                                                                                                                                                                                                                                                                                                                                                                                                                                                                                                                                                                                                                                                                                     |
| Date Submitted by the Author: | 29-Feb-2024                                                                                                                                                                                                                                                                                                                                                                                                                                                                                                                                                                                                                                                                                                                                                                                                                                                                                                                                                                                                                                                                                                                                                                                                                                                                                                                                                                                                                                                                                                                                                                                                                                                                                                                                                                                                  |
| Complete List of Authors:     | <p>Devoogdt, Nele; KU Leuven, Rehabilitation Sciences; KU Leuven University Hospitals Leuven, Center for lymphedema<br/> De Vrieze, Tessa; KU Leuven, Department of Rehabilitation Sciences<br/> Heroes, An-Kathleen; KU Leuven, Department of rehabilitation sciences; KU Leuven University Hospitals Leuven, Center for lymphedema<br/> Bechter-Hugl, Beate; KU Leuven University Hospitals Leuven, Vascular Surgery<br/> Fieuids, Steffen; Katholieke Universiteit Leuven, Biostats<br/> Godderis, Lode; KU Leuven, Centre for Environment and Health of KU Leuven<br/> Segers, Katarina; KU Leuven University Hospitals Leuven, Department of plastic and reconstructive surgery<br/> Maleux, Geert; KU Leuven University Hospitals Leuven, Department of radiology<br/> Deltombe, Thierry; CHU UCL Namur, Centre de Reference du Lymphoedème,<br/> Fripiat, Jacqueline; CHU UCL Namur, Centre de Reference du Lymphoedème,<br/> Servaes, Maxime; CHU UCL Namur<br/> Berners, Aline; CHU UCL Namur<br/> Fosseprez, Philippe; CHU UCL Namur<br/> Krug, Bruno; CHU UCL Namur<br/> Kayser, Françoise; CHU UCL Namur<br/> Falticeanu, Ana; CHU UCL Namur<br/> Randon, Caren; UZ Gent, Department of Thoracic and Vascular Surgery<br/> Monten, Chris; UZ Gent, Department of Radiotherapy<br/> Van Landuyt, Koen; UZ Gent<br/> De Pypere, Bernard; UZ Gent, Department of plastic and reconstructive surgery<br/> Degraeve, Liesl; UZ Gent, Department of plastic and reconstructive surgery<br/> Decorte, Tina; UZ Gent, Department of Physical Medicine and Rehabilitation<br/> De Schryver, Mieke; UZ Gent<br/> Van Besien, Vickie; UZ Gent<br/> Devos, Daniel; UZ Gent<br/> Suominen, Sinikka; Helsinki University Central Hospital<br/> Ayala, Jaume Masia; Universitat Internacional de Catalunya,</p> |

|                                                    |                                                                                                                                                                                                                                       |
|----------------------------------------------------|---------------------------------------------------------------------------------------------------------------------------------------------------------------------------------------------------------------------------------------|
|                                                    | Pons, Gemma; Hospital de la Santa Creu i Sant Pau, Department of plastic surgery<br>Fourneau, Inge; KU Leuven University Hospitals Leuven, Vascular Surgery<br>thomis, sarah; KU Leuven University Hospitals Leuven, Vascular Surgery |
| <b>&lt;b&gt;Primary Subject Heading&lt;/b&gt;:</b> | Cardiovascular medicine                                                                                                                                                                                                               |
| Secondary Subject Heading:                         | Surgery                                                                                                                                                                                                                               |
| Keywords:                                          | Vascular medicine < INTERNAL MEDICINE, Plastic & reconstructive surgery < SURGERY, VASCULAR SURGERY                                                                                                                                   |
|                                                    |                                                                                                                                                                                                                                       |

SCHOLARONE™  
Manuscripts

1  
2  
3 SurLym trial: Study protocol for a multicentre pragmatic randomised controlled trial on the added  
4 value of reconstructive lymphatic surgery to decongestive lymphatic therapy for the treatment of  
5 lymphoedema  
6  
7  
8  
9

10  
11 Nele Devoogdt<sup>1,2</sup>, Tessa De Vrieze<sup>2</sup>, An-Kathleen Heroes<sup>1,2</sup>, Beate Bechter-Hugl<sup>1</sup>, Steffen Fieuws<sup>3</sup>,  
12 Lode Godderis<sup>4</sup>, Katarina Segers<sup>5</sup>, Geert Maleux<sup>6</sup>, Thierry Deltombe<sup>7</sup>, Jacqueline Fripiat<sup>7</sup>, Maxime  
13 Servaes<sup>8</sup>, Aline Berners<sup>8</sup>, Philippe Fosseprez<sup>8</sup>, Bruno Krug<sup>9</sup>, Francoise Kayser<sup>9</sup>, Ana Falticeanu<sup>10</sup>, Caren  
14 Randon<sup>11</sup>, Chris Monten<sup>12</sup>, Koen Van Landuyt<sup>13</sup>, Bernard De Pypere<sup>13</sup>, Liesl Degraeve<sup>13</sup>, Tina Decorte<sup>14</sup>,  
15 Mieke De Schryver<sup>14</sup>, Vickie Van Besien<sup>14</sup>, Daniel Devos<sup>15</sup>, Sinikka Suominen<sup>16</sup>, Jaume Masia<sup>17</sup>,  
16 Gemma Pons<sup>17</sup>, Inge Fourneau<sup>1,‡</sup>, Sarah Thomis<sup>1,‡</sup>  
17  
18  
19  
20  
21  
22  
23

24 ‡ Contributed equally as last author to the SurLym trial  
25  
26  
27  
28

29 <sup>1</sup>University Hospitals Leuven, Department of Vascular Surgery, Centre for Lymphedema, Leuven,  
30 Belgium  
31

32 <sup>2</sup>KU Leuven – University of Leuven, Department of Rehabilitation Sciences, Leuven, Belgium  
33

34 <sup>3</sup>KU Leuven – University of Leuven, Leuven Biostatistics and Statistical Bioinformatics Centre (L-  
35 BioStat), Leuven, Belgium  
36  
37

38 <sup>4</sup>KU Leuven – University of Leuven, Centre for Environment and Health, Leuven, Flanders, Belgium  
39

40 <sup>5</sup>University Hospitals Leuven, Department of Plastic and Reconstructive Surgery, Leuven, Belgium  
41

42 <sup>6</sup>University Hospitals Leuven, Department of Radiology, Leuven, Belgium  
43  
44

45 <sup>7</sup>CHU UCL Namur – Site Godinne, Department of Physical Medicine and Rehabilitation, Centre de  
46 Reference du Lymphoedème, Yvoir, Belgium  
47  
48

49 <sup>8</sup>CHU UCL Namur – Site St-Elisabeth, Department of Plastic and Reconstructive Surgery, Namur,  
50 Belgium  
51  
52

53 <sup>9</sup>CHU UCL Namur – Site Godinne, Nuclear Medicine Department, Université catholique de Louvain,  
54 Yvoir, Belgium  
55  
56

57 <sup>10</sup>CHU UCL Namur – Site Godinne, Department of Radiology, Yvoir, Belgium  
58  
59  
60

1  
2  
3 <sup>11</sup>Ghent University Hospital, Department of Thoracic and Vascular Surgery, Lymphedema Clinic,  
4 Ghent, Belgium

5  
6  
7 <sup>12</sup>Ghent University Hospital, Department of Radiotherapy, Lymphedema Clinic, Ghent, Belgium

8  
9  
10 <sup>13</sup>Ghent University Hospital, Department of Plastic and Reconstructive Surgery, Lymphedema Clinic,  
11 Ghent, Belgium

12  
13  
14 <sup>14</sup>Ghent University Hospital, Department of Physical Medicine and Rehabilitation, Lymphedema  
15 Clinic, Ghent, Belgium

16  
17  
18 <sup>15</sup>Ghent University Hospital, Department of Radiology, Ghent, Belgium

19  
20 <sup>16</sup>Helsinki University and Helsinki University Hospital, Department of Plastic Surgery, Helsinki, Finland

21  
22 <sup>17</sup>Hospital de la Santa Creu i Sant Pau and the Hospital del Mar of Barcelona, Department of Plastic  
23 Surgery, Barcelona, Spain

24  
25  
26  
27  
28 Correspondence to:

29  
30  
31 Prof. Nele Devoogdt

32  
33 UZ Leuven, centre for lymphedema, Weligerveld 1, 3212 Pellenberg, Belgium

34  
35 00 32 16 34 25 15

36  
37 [nele.devoogdt@kuleuven.be](mailto:nele.devoogdt@kuleuven.be)

38  
39  
40  
41  
42 Support statement: TDV is a post-doctoral research fellow of the Research Foundation – Flanders  
43 (FWO).



1  
2  
3 **Trial registration data set**  
4

5  
6  
7  
8  
9  
10  
11  
12  
13  
14  
15  
16  
17  
18  
19  
20  
21  
22  
23  
24  
25  
26  
27  
28  
29  
30  
31  
32  
33  
34  
35  
36  
37  
38  
39  
40  
41  
42  
43  
44  
45  
46  
47  
48  
49  
50  
51  
52  
53  
54  
55  
56  
57  
58  
59  
60

|                                               |                                                                                                                                                                                                                                                                                                                                                              |
|-----------------------------------------------|--------------------------------------------------------------------------------------------------------------------------------------------------------------------------------------------------------------------------------------------------------------------------------------------------------------------------------------------------------------|
| Primary registry and trial identifying number | ClinicalTrials.gov Identifier: NCT05064176                                                                                                                                                                                                                                                                                                                   |
| Date of registration in primary registry      | 24-8-2021                                                                                                                                                                                                                                                                                                                                                    |
| Secondary identifying numbers                 | Ethical Committee UZ Leuven: S63212;<br>EudraCT: 2021-000397-29                                                                                                                                                                                                                                                                                              |
| Source of monetary and material support       | Belgian Health Care Knowledge Centre                                                                                                                                                                                                                                                                                                                         |
| Sponsor                                       | University Hospitals Leuven, Clinical Trial center, Herestraat 49,<br>3000 Leuven, Belgium                                                                                                                                                                                                                                                                   |
| Contact for public and scientific queries     | <a href="mailto:Nele.devoogdt@uzleuven.be">Nele.devoogdt@uzleuven.be</a>                                                                                                                                                                                                                                                                                     |
| Public title                                  | Added value of reconstructive lymphatic surgery to usual care in lymphoedema                                                                                                                                                                                                                                                                                 |
| Scientific title                              | Comparison of reconstructive lymphatic <b>surgery</b> versus no surgery, additional to decongestive lymphatic therapy (usual care), for the treatment of <b>lymphoedema</b> , through a multicenter, pragmatic 3andomized controlled trial                                                                                                                   |
| Acronym                                       | SurLym-trial                                                                                                                                                                                                                                                                                                                                                 |
| Protocol version                              | V3.0 19-4-2022                                                                                                                                                                                                                                                                                                                                               |
| Country of recruitment                        | Belgium                                                                                                                                                                                                                                                                                                                                                      |
| Health condition studied                      | Primary or secondary upper or lower limb lymphoedema stage 1 to 2b                                                                                                                                                                                                                                                                                           |
| Intervention                                  | Intervention group: Reconstructive lymphatic surgery (i.e. LVA or LNT or combination), added to usual care<br>Control group: Only usual care (no surgery)                                                                                                                                                                                                    |
| Key inclusion and exclusion criteria          | -Lymphoedema: upper/ lower limb; uni-/ bilateral; primary or secondary; stage 1 to 2b; $\geq 5\%$ volume difference or $\geq 2$ minor/ 1 major lymphoscintigraphy criterion; total score or one domain score of Lymph-ICF questionnaire $\geq 25/100$<br>-History of DLT ( $\geq 6M$ ) until minimal pitting, no liposuction/ reconstructive surgery in past |

|                         |                                                                                                                                                                                                                                                     |
|-------------------------|-----------------------------------------------------------------------------------------------------------------------------------------------------------------------------------------------------------------------------------------------------|
|                         | -In case of lower limb lymphoedema: no CVI C4-C6, no DVT/ PTS<br>-Age $\geq$ 18 years, not pregnant, BMI $\leq$ 35<br>-No allergy for ICG/ iodine; no increased activity/ benign tumor thyroid gland; no heparin use and severe renal insufficiency |
| Study type              | Multicentre, pragmatic randomised controlled trial                                                                                                                                                                                                  |
| Date of first enrolment | March 2022                                                                                                                                                                                                                                          |
| Target sample size      | 180                                                                                                                                                                                                                                                 |
| Recruitment status      | Recruiting                                                                                                                                                                                                                                          |
| Primary endpoint        | Lymphoedema-specific QOL, at 18 months post-baseline                                                                                                                                                                                                |
| Key secondary endpoints | Limb volume, at 18 months post-baseline<br>Duration of wearing the compression garment, at 18 months post-baseline                                                                                                                                  |
| Treatment duration      | 18 months (usual care)                                                                                                                                                                                                                              |
| Follow up duration      | 36 months                                                                                                                                                                                                                                           |

## Abstract

### Introduction

Lymphoedema is a chronic condition caused by lymphatic insufficiency. It leads to swelling of the limb/ midline region and an increased risk of infection. Lymphoedema is often associated with mental and physical problems limiting quality of life. The first choice of treatment is a conservative treatment, consisting of exercises, skin care, lymph drainage and compression. Reconstructive lymphatic surgery is also often performed, i.e. lymphovenous anastomoses (LVA), lymph node transfer (LNT), or a combination. However, robust evidence on the effectiveness of reconstructive lymphatic surgery is missing. Therefore, the objective of this trial is to investigate the added value of reconstructive lymphatic surgery to the conservative treatment in patients with lymphoedema.

### Methods and analysis

A multicentre randomised controlled and pragmatic trial was started since March 2022 in 3 Belgian university hospitals. Ninety patients with arm lymphoedema and 90 patients with leg lymphoedema will be included. All patients are randomised between conservative treatment alone (control group) or conservative treatment with reconstructive lymphatic surgery (intervention group). Assessments are performed at baseline and at 1, 3, 6, 12, 18, 24 and 36 months. The primary outcome is lymphoedema-specific quality of life at 18 months. Key secondary outcomes are limb volume and duration of wearing the compression garment at 18 months. The approach of reconstructive lymphatic surgery is based on pre-surgical investigations including clinical examination, lymphofluoroscopy, lymphoscintigraphy, lymph MRI or CT angiography (if needed). All patients receive conservative treatment during 36 months, which is applied by the patient's own physical therapist and by the patient self. From month 7-12, the hours a day of wearing the compression garment are gradually decreased.

### Ethics and dissemination

The study has been approved by the ethical committees of University Hospitals Leuven, Ghent University Hospital and CHU UCL Namur. Results will be disseminated via peer-reviewed journals and presentations.

ClinicalTrials.gov Identifier: NCT05064176

Keywords: lymphedema, reconstructive surgery, surgical anastomosis, surgical flap

Word count: 4623 (up to data security and management), 5050 for all parts

### Strengths and limitations of this study

- 1) This trial is stratified and powered for the effect of reconstructive lymphatic surgery in both arm and leg lymphoedema and will permit a conclusion regarding the effect of reconstructive lymphatic surgery in both groups.
- 2) As independent experts in reconstructive lymphatic surgery have trained the surgeons of the 3 study centers and advanced imaging techniques (i.e. ICG lymphofluoroscopy, lymph MRI, lymphoscintigraphy and CT angiography) are used to prepare the surgical procedure, high-qualitative reconstructive surgery procedures are guaranteed.
- 3) A comprehensive evaluation of the participants with lymphoedema will be performed by assessing lymphoedema-specific quality of life, which is a self-reported outcome, and by determining limb volume and duration of wearing the compression garment, which are objective outcomes.
- 4) If reconstructive lymphatic surgery is found effective, a detailed inventory of cost and quality of life will permit a cost-effectiveness analysis.
- 5) Besides a statistical plan, also a monitoring plan, data management plan, communication plan and risk assessment plan has been set in place.

## INTRODUCTION

Lymphoedema is a chronic and debilitating condition caused by lymphatic insufficiency. It leads to swelling of the limb/ midline region and an increased risk of infection. It can be classified as primary (congenital) or secondary (acquired) lymphoedema. Lymphoedema is very burdensome for the patient, often causing mental problems such as frustration and stress.(1) In addition, due to the increase in volume of the limb, patients may develop physical problems, such as pain, heaviness, loss of strength, as well as functional problems with household, mobility or social activities.(2) These mental, physical and functional problems have a negative impact on the quality of life and the ability to work.(3)

There is consensus that the first choice of treatment of lymphoedema is a conservative treatment, also called decongestive lymphatic therapy (DLT).(4, 5) In case of pitting oedema, this consists of an intensive daily treatment to maximally reduce the oedema volume. This phase consists of skin care, manual lymph drainage, multilayer bandaging and exercise therapy. Once sufficient reduction of the pitting is obtained (i.e. there is no or minimal pitting) and the patients received education to improve their self-management skills, the maintenance phase starts, which aims at stabilising the results obtained in the previous phase. During the maintenance phase, skin care, exercises and lymph drainage are continued but bandaging is replaced by low-stretch compression garments. Professional's involvement can be minimised in this phase.

Reconstructive lymphatic surgery is another treatment option, consisting of either lymphovenous anastomoses (LVA), lymph node transfer (LNT) or a combination of both. The choice can be based on the surgeons clinical judgement or on local algorithms, as the Barcelona Lymphoedema Algorithm.(6) The objective of LVA is to redirect the lymph to the venous stream directly, bypassing areas of obstruction, and without going through the thoracic duct. LVA is applied if functional lymphatics can be localized, primarily by ICG lymphofluoroscopy and lymph MRI.(7) With LNT, orthotopically placed lymph nodes act as a sponge to absorb lymphatic fluid and direct it into the vascular network. The transferred nodes may also induce lymphangiogenesis and if they are placed in the site of lymphadenectomy, scar tissue and adhesions are removed, which may lower the pressure on the vein.(8) The lymphangiogenesis and the increase of the diameter of the vein as well may improve vascularisation.(5, 9) Indications for LNT are a total occlusion of lymphatic transport visualised through lymphoscintigraphy and a stage 2 lymphoedema with repeated episodes of erysipelas. Only subjects who had a history of at least 6 to 12 months of conservative treatment with good decongestion of the limb are candidates for reconstructive lymphatic surgery.(7)

1  
2  
3 Our hypothesis is that reconstructive lymphatic surgery partially restores the lymphatic transport  
4 which leads to a decrease of the lymphoedema volume and as a result lowers the need for a  
5 compression garment. This will probably improve lymphoedema-specific quality of life.  
6  
7

8  
9 Robust evidence on the effectiveness of reconstructive lymphatic surgery for lymphoedema has so  
10 far not been procured. In 2019, a Cochrane systematic review of Markkula et al revealed that there is  
11 not enough high-quality research investigating the effect of reconstructive lymphatic surgery on  
12 lymphoedema.(10) Only one RCT so far evaluated the effect of LNT. Dionyssiou et al randomised 36  
13 patients with breast cancer related arm lymphoedema.(11) After surgery/no surgery, all patients first  
14 received for 6 months DLT and DLT was discontinued for the next 12 months. At 18 months follow-  
15 up, mean limb volume reduction was superior in the group with LNT compared to no LNT (57% vs  
16 18%,  $p<0.01$ ). In the group with LNT infections were less frequent and subjective symptoms  
17 improved. An RCT evaluating the effect of LVA has not been performed yet.  
18  
19  
20  
21  
22  
23  
24  
25  
26

## 27 **Objectives**

28  
29 The main objective of this study is to investigate the added value of reconstructive lymphatic surgery  
30 to decongestive lymphatic therapy (usual care) in patients with lymphoedema of the upper limb or  
31 lower limb in terms of lymphoedema-specific QoL (primary outcome), limb volume and duration of  
32 wearing the compression garment (key secondary outcomes) at 18 months and of other outcomes at  
33 1, 3, 6, 12, 18, 24 and 36 months post-baseline (secondary outcomes; see table 1 for the outcomes).  
34  
35

36  
37 A secondary objective is to verify whether the rate of complications in participants receiving  
38 reconstructive lymphatic surgery is acceptable and if so, whether these complications are reversible.  
39 We also verify in patients with lymphoedema due to cancer treatment, if reconstructive lymphatic  
40 surgery causes higher cancer recurrence rates.  
41  
42  
43  
44

45  
46 A first exploratory objective is to compare the added value of the reconstructive surgery between  
47 different subgroups (stage 1 vs stage 2; normal weight vs overweight; combination of LVA and LNT vs  
48 one method). A second exploratory objective is to investigate predictive variables for lymphoedema-  
49 specific QoL at 36 months.  
50  
51  
52  
53  
54  
55  
56  
57  
58  
59  
60

Table 1 Overview of the primary and secondary outcomes and the assessment method at each time interval

| Outcome                                                                        | Method                                                                         | A1       | A2, 3, 4 | A5  | A6  | A7  | A8  |
|--------------------------------------------------------------------------------|--------------------------------------------------------------------------------|----------|----------|-----|-----|-----|-----|
|                                                                                |                                                                                | Baseline | 1, 3, 6M | 12M | 18M | 24M | 36M |
| Primary outcome                                                                |                                                                                |          |          |     |     |     |     |
| Lymphoedema-specific QoL                                                       | Lymph-ICF questionnaire for upper or lower limb lymphoedema(12-15)             | X        |          |     | X   |     |     |
| Secondary outcomes                                                             |                                                                                |          |          |     |     |     |     |
| Self-reported questionnaire                                                    |                                                                                |          |          |     |     |     |     |
| Lymphoedema-specific QoL                                                       | See primary outcome                                                            | X        | X        | X   |     | X   | X   |
| Duration (key secondary outcome) and experience of wearing compression garment | ICC compression questionnaire(16)                                              | X        | X        | X   | X   | X   | X   |
| Health related QoL                                                             | EuroQoL-5D-5L(17)                                                              | X        | X        | X   | X   | X   | X   |
| Work capacity and ability                                                      | Work Productivity and Activity Impairment questionnaire;(18) QuickScan 18 (19) | X        | X        | X   | X   | X   | X   |
| Physical activity level                                                        | International Physical Activity Questionnaire(20)                              | X        | X        | X   | X   | X   | X   |

1  
2  
3  
4  
5  
6  
7  
8  
9  
10  
11  
12  
13  
14  
15  
16  
17  
18  
19  
20  
21  
22  
23  
24  
25  
26  
27  
28  
29  
30  
31  
32  
33  
34  
35  
36  
37  
38  
39  
40  
41  
42  
43  
44  
45  
46

|                                                                        |                                                             |   |   |   |   |   |   |
|------------------------------------------------------------------------|-------------------------------------------------------------|---|---|---|---|---|---|
| Costs related to lymphoedema and its treatment*                        | Study-specific questionnaire                                |   | X | X | X | X | X |
| Usual care & self-management*§, including need for intensive treatment | Study-specific questionnaire                                |   | X | X | X | X | X |
| <b>Assessments</b>                                                     |                                                             |   |   |   |   |   |   |
| Limb volume (key secondary outcome)                                    | Circumference measurements every 4 cm with perimeter(21-24) | X | X | X | X | X | X |
| Hand/ foot volume                                                      | Water displacement method of hand or foot(22, 25)           | X | X | X | X | X | X |
| Failure to reduce hours a day of wearing compression garment           | Based on change of limb volume                              |   |   | X | X | X | X |
| Body weight                                                            | Scale                                                       | X | X | X | X | X | X |
| Infection previous 18 months                                           | Interview                                                   | X |   |   | X |   | X |
| Recurrence of cancer                                                   | Interview and medical file                                  |   |   |   | X |   | X |
| Adverse events and complications of surgery                            | Interview and medical file                                  |   | X | X | X | X | X |
| Lymphatic transport                                                    | ICG fluoroscopy;(26) lymphoscintigraphy(27, 28)             | X |   |   | X |   |   |

\* Information is collected on a monthly basis; § No secondary outcome



## METHODS AND ANALYSIS

Described according to the SPIRIT guidelines.(29)

### Trial design and study setting

A multicentre, pragmatic randomised controlled trial is performed at three university hospitals in Belgium: University Hospitals Leuven (UZ Leuven), Ghent University Hospital (UZ Gent) and CHU UCL Namur.

The general flow, starting from screening for eligibility, is shown in figure 1.

Before the real screening (A0), a fast eligibility check is performed and Informed Consent Form is signed. If the patient is eligible and confirms participation, he/ she is randomised. The interval between screening (A0) and baseline assessment (A1) is ideally less than 3 months, but may be up to 6 months. The baseline assessments have to be performed shortly before the surgery, with a maximal interval of 1 month.

Figure 1. Flow diagram of the SurLym trial

### Patient and public involvement in the trial design

Four patients with arm lymphoedema and 3 patients with leg lymphoedema from the center for lymphedema of UZ Leuven have completed a questionnaire about the study design and feasibility of the SurLym study. All but one patient, found the primary outcome, assessment of lymphoedema-specific QoL, a relevant and very important outcome. This patient preferred arm volume (which is a key secondary outcome) as outcome measure. None of the patients objected to a technical examination using an injection in the hand/ foot of the affected side (for imaging of the lymphatic system). All patients found it feasible to come to the hospital for 8 study-visits during 36 months, well aware that two of the visits take up to 6 hours. Three of seven patients were not keen to undergo surgery at the affected limb. All patients declared having little problems performing usual care: only one patient considered self-management difficult and another patient was afraid to reduce the hours of wearing the compression garment.

From the patients willing to be part of the trial's patient board (n=5), two patients were selected: one patient with arm lymphoedema and one with leg lymphoedema. They are both member of the Trial Steering Committee. The rationale and design of the trial was thoroughly discussed with them. They

1  
2  
3 will be invited to further participate during future meetings of the Trial Steering Committee, to  
4 advise us during the course of the trial and for the dissemination of the project results.  
5  
6  
7  
8

### 9 **Eligibility criteria**

10 Patients *eligible for inclusion* in the trial have to meet all of the following criteria:

- 11 1) Unilateral or bilateral, primary or secondary lymphoedema of the upper or lower limb;
- 12 2) If cancer-related lymphoedema, approval for participation from the multidisciplinary oncological
- 13 board; participation only if estimated cancer-related survival is  $\geq 3$  years and no concerns on
- 14 oncological safety are raised;
- 15 3) Lymphoedema stage 1 to 2 (according to staging 1-3 of International Society of Lymphology)(5);
- 16 4) Objective diagnosis of lymphoedema:  $\geq 5\%$  volume difference OR  $\geq 2$  minor/ 1 major criteria on
- 17 lymphoscintigraphy OR presence of ICG dermal backflow;
- 18 5) Total score or one of domain scores on Lymph-ICF questionnaire at screening:  $\geq 25/100$  (=
- 19 moderate level of problems in functioning related to the development of lymphoedema)(14);
- 20 6) History of at least 6 months of DLT until minimal pitting (sustained thumb pressure on the skin is
- 21 performed during 5 seconds; after removing the thumb, indentation of tissue is evaluated and is
- 22 scored as 0 = no clinical pitting, 1 = slight/doubtful pitting and 2 = noticeably pitting; a patient with
- 23 score 2 may not participate)(30);
- 24 7) Age  $\geq 18$  years.

25  
26  
27  
28  
29  
30  
31  
32  
33  
34  
35  
36  
37  
38  
39 Following persons are *excluded*:

- 40 1) Persons with history of liposuction, LVA or LNT;
- 41 2) Persons who are pregnant or plan to become pregnant in the next 18 months;
- 42 3) Severely obese participants: BMI $>35$ ;
- 43 4) In case of lower limb lymphoedema: presence of chronic venous insufficiency C4, C5, C6; deep
- 44 venous thrombosis; post-thrombotic syndrome;
- 45 5) Allergy for ICG, iodine; increased activity of thyroid gland; benign tumour in thyroid gland; heparin
- 46 use and severe renal insufficiency
- 47  
48  
49  
50  
51  
52  
53

### 54 **Recruitment, participant screening and consent**

55  
56 The recruitment of patients started in March 2022. One hundred eighty patients have to be recruited  
57 by the 3 hospitals. Initially a recruitment period of 24 months (= 7.5 pts/ month) was planned  
58 however difficulties in accessing operating theatres linked to COVID have caused delays. To make the  
59  
60

1  
2  
3 recruitment period as short as possible, a competitive recruitment is applied. We estimate that  
4 around 20% of the patients screened for eligibility (A0, n=900) can be accepted for participation.  
5

6  
7 Identification of eligible patients will be performed by the (sub)investigators of the lymphoedema  
8 centres of the 3 hospitals (ST, BBH, AKH and ND for UZ Leuven; CM, CR, TD, VVB, MDS for UZ Gent;  
9 and TD, JF, MS, AB, PF for CHU UCL Namur), supported by the study coordinators. The consultation  
10 lists of the lymphoedema centres are screened before the consultation and the possible patients  
11 eligible for the trial are marked.  
12  
13  
14

15  
16 During the lymphoedema consultation, the clinician checks the eligibility criteria for which a  
17 measurement is not necessary; if the patient seems eligible and he/ she is interested to receive  
18 information about the trial, the trial is discussed using a study-specific recruitment document: this is  
19 a concise and well-organised document that clarifies the design of the study and provides  
20 information about side effects, costs and potential benefits and harms of participation. If a patient is  
21 interested to participate, he/ she receives the Informed Consent Form and the 'study at a glance  
22 (summary)' document. In addition, the patient receives an appointment for the screening (A0). Some  
23 patients are informed about the trial through another way, e.g. by their oncologist. In that case, the  
24 patient contacts the study coordinator by phone, who performs the fast eligibility check and  
25 discusses the study during the phone call. If the patient is interested to participate, the Informed  
26 Consent Form and the 'study at a glance' document is sent. In addition, the patient receives an  
27 appointment for the screening (A0).  
28  
29  
30  
31  
32  
33  
34  
35

36 During the *screening appointment (A0)*, patients receive all information and explanation they request  
37 or need before signing the Informed Consent Form. Thereafter, the complete screening procedure is  
38 executed to verify whether the participant fulfils all eligibility criteria.  
39  
40  
41  
42  
43

44 In order to optimally recruit patients with lymphoedema, the study is presented inside (at other  
45 departments) as well as outside the hospitals of the study centers by lectures, posters and mailing.  
46 Potential candidates with lymphoedema as well as their treating physicians, physical therapists and  
47 other health care providers are informed about the trial (through social media, publication in local  
48 journals and on websites).  
49  
50  
51  
52  
53  
54

### 55 **Allocation and randomisation**

56  
57 Given the nature of the trial, *blinding* of participants and care providers (surgeon/ physical therapist/  
58 compression specialist) is not feasible. Because the participants fill out different questionnaires to  
59  
60

1  
2  
3 determine the primary outcome and some of the secondary outcomes, detection bias may be a  
4 potential risk. However, bias of the participants will be limited as much as possible because the study  
5 will be explained by a neutral person (physical therapists ND, AKH, VVB, MDS, JF or physical medicine  
6 & rehabilitation physician TD (hospital of Ghent), TD (hospital of CHU UCL)).  
7  
8  
9

10 The *randomisation* is computer generated. To obtain concealment of allocation, the randomisation  
11 list is prepared by the trial's statistician (SF) and is incorporated in the data management tool  
12 'REDCap'. Randomisation is performed by using varying block sizes. A 1:1 allocation ratio is applied. A  
13 stratification is applied for study centre (UZ Leuven vs UZ gent vs CHU-UCL Namur) and for region of  
14 lymphoedema (upper limb vs lower limb, with a ratio 1:1). At each participating site, only the chief  
15 investigator (ND) and trial manager (TDV), investigators and study coordinators have access to the  
16 randomisation tool in REDCap. After randomisation, the study coordinator of the specific study  
17 centre plans the intervention if applicable (surgery), as well as the usual care and the follow-up  
18 assessments.  
19  
20  
21  
22  
23  
24

25  
26 After all patients have finished the trial and the database is locked to analyse the data, the  
27 randomisation code will be broken.  
28  
29  
30  
31

## 32 **Intervention**

33  
34 All participants are randomised to the intervention or control group. The intervention group is  
35 treated with reconstructive lymphatic surgery in addition to conservative DLT (decongestive  
36 lymphatic therapy; usual care). In the control group patients only receive conservative DLT (usual  
37 care) without surgery (see figure 1).  
38  
39  
40

41  
42 The researchers will follow the protocol as strictly as possible. However, since the pragmatic nature  
43 of the trial, a deviation of the protocol is allowed if necessary. This protocol deviation has to be  
44 registered in the protocol deviation log.  
45  
46  
47  
48  
49

### 50 *Reconstructive lymphatic surgery*

51  
52 The intervention treatment is reconstructive lymphatic surgery and is performed by the team of  
53 vascular and/ or plastic surgeons from each study center (ST and KT of UZ Leuven; BDP and LD of  
54 Ghent University Hospital; and MS, AB and PF of CHU UCL Namur). As reconstructive technique, a  
55 lymphovenous anastomosis (LVA), lymph node transfer (LNT) or a combination of both is applied.  
56  
57  
58  
59 The choice of the technique is determined by the surgeons of the study centre. See table 2 for the  
60

1  
2  
3 overview of the preparation and for the technical description of the reconstructive procedure (which  
4 is based on Chang et al).(7) In table 3 the aftercare is discussed.  
5  
6

7 To obtain standardisation and to ascertain the quality of the reconstructive lymphatic surgery, all  
8 surgeons received training in the Reconstructive Microsurgery European School (by JM and GP) in  
9 May 2021. Moreover, to improve standardisation of the patient selection and the reconstructive  
10 lymphatic procedure between the surgeons and between the centres, every patient that is planned  
11 for surgery in the trial is discussed during a monthly meeting with at least one surgeon per centre  
12 attending. A final quality control measure is that the first 10 surgical procedures are discussed with  
13 the whole surgical team including the independent experts JM, GP, SS and KVL.  
14  
15  
16  
17  
18  
19  
20  
21  
22  
23  
24  
25  
26  
27  
28  
29  
30  
31  
32  
33  
34  
35  
36  
37  
38  
39  
40  
41  
42  
43  
44  
45  
46  
47  
48  
49  
50  
51  
52  
53  
54  
55  
56  
57  
58  
59  
60

Table 2. Overview of the preparation and procedure of LVA and LNT

| Timing              |                                                         | Lymphovenous anastomosis (LVA)                                                                                                                                                                                                                                                                                                              | Lymph node transfer (LNT)                                                                                                                                                                                                                                                                     |
|---------------------|---------------------------------------------------------|---------------------------------------------------------------------------------------------------------------------------------------------------------------------------------------------------------------------------------------------------------------------------------------------------------------------------------------------|-----------------------------------------------------------------------------------------------------------------------------------------------------------------------------------------------------------------------------------------------------------------------------------------------|
| Before surgery      | Clinical reasoning based on pre-surgical investigations | Presence of suitable lymphatic vessel(s), visualised through ICG lymphofluoroscopy and/ or lymph MRI.                                                                                                                                                                                                                                       | Presence of fibrosis or adhesions due to surgery, lymph node dissection and/ or radiotherapy, known through inspection and visualisation of interruption of lymphatic transport by lymphoscintigraphy.<br>Presence of a well-vascularised donor flap (CT angiography is performed if needed). |
| Week before surgery | Compression garment                                     | Measured by the team of compression specialists of the specific center;<br>Choice of the type of compression garment is made pragmatically, as performed in the real clinical situation. So, length, options, compression class, type (flat/round-knitted, standard/custom-made) of the compression garment is determined patient-specific. |                                                                                                                                                                                                                                                                                               |
|                     | Registration of compression garment                     | Compression specialist registers each time after delivery the type of compression material and cost for patient/ health insurance.                                                                                                                                                                                                          |                                                                                                                                                                                                                                                                                               |
| Surgery             | Material                                                | Microsurgical equipment to make anastomoses of vessels with diameter of 0.3-0.8 mm (suture size 11 or 12), supermicro clips, fine bipolar.                                                                                                                                                                                                  | Microsurgical equipment to perform vascularised lymph-tissue transfer, suturing vein and artery with suture size 9 or 10, micro clips, fine bipolar.                                                                                                                                          |
|                     | Preparation                                             | ICG is injected interdigitally and lymph transport is designed on skin and location(s) of anastomosis is indicated (confirmed by lymph MRI).                                                                                                                                                                                                | To check for the safety not developing limb oedema due to the dissection of lymph nodes, <sup>99m</sup> Tc nanocolloids or ICG                                                                                                                                                                |

|  |              |                                                                                                                                                                                                                                                                                                                                                                                                                                                                                                                                                                                                                                                   |                                                                                                                                                                                                                                                                                                                                                                                                                                                                                                                                                                                                                                                                                          |
|--|--------------|---------------------------------------------------------------------------------------------------------------------------------------------------------------------------------------------------------------------------------------------------------------------------------------------------------------------------------------------------------------------------------------------------------------------------------------------------------------------------------------------------------------------------------------------------------------------------------------------------------------------------------------------------|------------------------------------------------------------------------------------------------------------------------------------------------------------------------------------------------------------------------------------------------------------------------------------------------------------------------------------------------------------------------------------------------------------------------------------------------------------------------------------------------------------------------------------------------------------------------------------------------------------------------------------------------------------------------------------------|
|  |              |                                                                                                                                                                                                                                                                                                                                                                                                                                                                                                                                                                                                                                                   | are injected in 1 <sup>st</sup> web of both hands (in case the donor site is the axilla) or feet (in case the donor site is the groin).                                                                                                                                                                                                                                                                                                                                                                                                                                                                                                                                                  |
|  | Anaesthesia  | General or if wish of patient local                                                                                                                                                                                                                                                                                                                                                                                                                                                                                                                                                                                                               | General                                                                                                                                                                                                                                                                                                                                                                                                                                                                                                                                                                                                                                                                                  |
|  | Procedure    | <ol style="list-style-type: none"> <li>1) Patent blue is injected distal of location of anastomosis.</li> <li>2) 2-3 cm incision.</li> <li>3) Functional lymphatic is dissected, lymphatic is kept wet and lumen is made open; picture is taken.</li> <li>4) Lymphatic is anastomosed to vein.</li> <li>5) Between 1 and 10 anastomoses are made.</li> <li>5) With ICG camera is checked whether anastomosis is open.</li> <li>6) Wound is covered and cotton wool and elastic bandages are applied around the whole limb.</li> </ol>                                                                                                             | <ol style="list-style-type: none"> <li>1) ICG is injected interdigitally.</li> <li>2) Patent blue is injected distal of donor side flap.</li> <li>3) Donor site flap is resected (= lymph nodes and skin and tissue around): in most cases groin proximal of inguinal ligament, sometimes lateral trunk; picture is taken.</li> <li>4) Donor site flap is transferred to recipient site (= region with fibrosis/ adhesion): a wide excision of scar tissue is made to ensure a healthy bed for lymphangiogenesis and to improve bridging of lymphatics; picture is made.</li> <li>5) Wound is covered and cotton wool and elastic bandages are applied around the whole limb.</li> </ol> |
|  | Registration | <ol style="list-style-type: none"> <li>1) Duration of procedure (in minutes).</li> <li>2) Description of procedure: LVA vs LNT vs combination; general vs local anaesthesia; per-operative ICG fluoroscopy or scintigraphy; injection patent blue and localisation; for LVA, number of anastomoses and location; for LNT, donor site and recipient site.</li> <li>3) Material (amount): flacon ICG/ patent blue; surgical wire; wound dressing; bandaging material (cotton wool, non-elastic bandages, tubular bandage); other material</li> <li>4) Personnel (number and duration of presence): surgeon(s); nurse(s); other personnel</li> </ol> |                                                                                                                                                                                                                                                                                                                                                                                                                                                                                                                                                                                                                                                                                          |

1  
2  
3  
4  
5  
6  
7  
8  
9  
10  
11  
12  
13  
14  
15  
16  
17  
18  
19  
20  
21  
22  
23  
24  
25  
26  
27  
28  
29  
30  
31  
32  
33  
34  
35  
36  
37  
38  
39  
40  
41  
42  
43  
44  
45  
46

Table 3. Overview of the after care in the hospital and at home following LVA and LNT.

| Timing                |                     | Lymphovenous anastomosis (LVA)                                                                                                                                                                                                                                                  | Lymph node transfer (LNT)     |
|-----------------------|---------------------|---------------------------------------------------------------------------------------------------------------------------------------------------------------------------------------------------------------------------------------------------------------------------------|-------------------------------|
| Aftercare in hospital | Number of days      | 1 day or longer if necessary                                                                                                                                                                                                                                                    | 2 days or longer if necessary |
|                       | Medication          | To prevent thrombosis, to stimulate vasodilation, to reduce pain, to prevent infection                                                                                                                                                                                          |                               |
|                       | Inelastic bandage   | In most of the patients (if risk of damaging LVA/ LNT by putting on compression garment; First tubular bandage and cotton wool covering whole limb, then non-elastic bandages, finally other tubular bandage over bandages (to keep everything together); keep it day and night |                               |
|                       | Advise              | As much as possible limb elevation and regularly muscle contractions                                                                                                                                                                                                            |                               |
|                       | Registration        | 1) Number of days of hospitalisation<br>2) Material (amount): bandaging material (cotton wool, non-elastic bandages, tubular bandage); other material<br>3) Medication (type and amount)                                                                                        |                               |
| Aftercare at home     | Wound control       | Once a week, inelastic bandage is removed, wound is cared and bandage is re-applied                                                                                                                                                                                             |                               |
|                       | Advise              | As long as wound is not closed, as much as possible limb elevation and regularly muscle contractions                                                                                                                                                                            |                               |
|                       | Compression garment | If wound is healed, new compression garment is applied and usual care protocol is started                                                                                                                                                                                       |                               |
|                       | Registration        | 1) Number of wound control visits and duration<br>2) Material (amount): bandaging material (cotton wool, non-elastic bandages, tubular bandage); wound care material; other material<br>3) Personnel (number and duration of presence): surgeon(s); nurse(s); other personnel   |                               |



### *Usual care*

All patients receive usual care. The patient's own (regular) physical therapist performs the usual care in a pragmatic way consisting of exercises and skin care and manual lymph drainage (MLD) (i.e. the maintenance phase of decongestive lymphatic therapy (DLT)). Nevertheless, MLD is not an evidence-based treatment modality for lymphoedema, it was added to the usual care as it stimulates lymph flow through functional lymphatics (31). Many surgeons specialised in performing reconstructive lymphatic surgery believe that performing MLD after LVA is important to keep the anastomosis open. Moreover, the physical therapist educates the patient to perform self-management, i.e. self-exercises, self-skin care, self-MLD, self-bandaging and putting on and removing the compression garment. In all patients (of intervention and control group), a new compression garment is measured by the compression specialist at baseline. The schematic overview of the usual care is given in figure 1 and is divided into four periods:

1) M1-6: From week 3 (or, in the intervention group, after healing of the wounds) the patient sees the home physical therapist twice per week and from week 5 once a week. The patient also performs self-management.

2) M7-12: The patient sees the own physical therapist once a week. The compression garment use is gradually reduced from 16h/d (end of 6<sup>th</sup> month) to 0h/d (end of 12<sup>th</sup> month). The own physical therapist performs circumference measurements of the limb weekly (i.e. with a perimeter provided by the study team) to control for changes of the limb volume(23). The patient completes a digital scoring form in REDCap weekly. The study investigator of the center checks the change of limb volume every week: if the limb volume increases  $\geq 5\%$  compared to baseline, the patient is planned for an intermediate checkup in the study center. The study investigator decides whether the hours a day of wearing the compression garment has to be increased again.

3) M13-18: The patient only performs self-management and does not see the own physical therapist anymore. If possible, the patient does not wear the compression garment.

4) M19-36: The patient may choose whether he/ she visits the own physical therapist or performs self-management, or a combination.

This scheme of usual care has to be followed as strictly as possible, except when the patient's clinical situation deteriorates or risks to deteriorate. For example, a patient may visit the physical therapist more often in case of more lymphoedema-related complaints due to warm weather. Or, if during the follow-up, the clinical situation of the lymphoedema deteriorates unacceptably (e.g. there is presence of pitting oedema in the limb or there is a wound), the study investigator may advise the

1  
2  
3 patient and physical therapist to perform an intensive treatment of the lymphoedema with  
4 bandaging. This information has to be registered by the patient in the usual care questionnaire.  
5  
6

7 To obtain standardisation of the usual care, the physical therapist of the patient receives a training  
8 before the start of the study. During this training, instructions about the study protocol are given  
9 orally. In addition, the physical therapist receives an informative leaflet explaining the aim and design  
10 of the trial, the treatment in the intervention/ control group and the assessment of the patient. It  
11 also clarifies what the study investigators expect from the patient's physical therapist and vice-versa.  
12 Following information regarding the patient's physical therapist is collected: age and gender,  
13 education level and experience with treating lymphoedema (number of years of experience and in  
14 which modalities, type of lymphoedema education).  
15  
16  
17  
18  
19  
20  
21  
22

### 23 **Outcomes**

24  
25  
26 The outcome measures were chosen based on input from patients with lymphoedema (see section  
27 'patient and public involvement') and on input from the investigators of this trial who have  
28 experience in evaluating and treating patients with lymphoedema. Patient-reported outcomes  
29 provide essential information about the patient experience with the intervention that cannot be  
30 reliably captured in another way, and are necessary for the complete evaluations of risks and  
31 benefits and the value of the intervention. As a consequence, the trial's primary outcome is a  
32 patient-reported outcome.<sup>(32)</sup> Moreover, recently, Chang et al stated in their systematic review and  
33 meta-analysis about the surgical treatment of lymphoedema that better designed studies are  
34 necessary: with objective reporting of outcomes using quantitative methods for measuring fluid and  
35 both physiologic and immunologic function during longer follow-up.<sup>(33)</sup>  
36  
37  
38  
39  
40  
41  
42

43 Assessments are performed at baseline (A1) and at 1 month (A2), 3 months (A3), 6 months (A4), 12  
44 months (A5), 18 months (A6), 24 months (A7) and 36 months (A8) post-baseline. However, to limit  
45 the burden for the patients, not all outcomes are assessed at each time interval. See table 1 for the  
46 overview of the outcomes per time interval and see the Appendix for the assessment method and  
47 the description of the assessment per variable and outcome. Figure 1 gives an overview of the timing  
48 of the baseline assessment related to the screening and to the surgery, and of the foreseen windows  
49 for the follow-up assessments.  
50  
51  
52  
53  
54

55 At baseline, patient's demographics and information about the characteristics of the lymphoedema  
56 and its treatment is collected.  
57  
58  
59  
60

1  
2  
3 The primary outcome is lymphoedema-specific QoL (= problems in functioning related to  
4 development of lymphoedema) at 18 months, evaluated with the Dutch or French version of the  
5 Lymph-ICF questionnaire for upper or lower limb lymphoedema.(13-15, 34) Besides this patient-  
6 reported outcome, the trial contains also two key secondary outcomes at 18 months that are  
7 objective outcomes. These are limb volume and failure to reduce the hours a day of wearing the  
8 compression garment. In addition, these outcomes will be investigated at other time points in the  
9 short term (1, 3, 6, 12 months) and longer term (24 and 36 months) as a secondary outcome  
10 parameter. The outcome limb volume is determined differently in participants with upper and lower  
11 limb lymphoedema. Since most of the patients with upper limb lymphoedema have unilateral  
12 lymphoedema, limb volume is determined as the relative excessive arm volume. As too many  
13 patients with lower limb lymphoedema have bilateral lymphoedema, limb volume is determined as  
14 the leg volume.

15  
16  
17  
18  
19  
20  
21  
22  
23  
24 Other secondary outcomes are: duration of wearing the compression garment during one week and  
25 experience of the compression garment, health-related QoL, work capacity and ability, physical  
26 activity level, costs related to lymphoedema and its treatment, need for intensive treatment, hand/  
27 foot volume, failure to reduce the hours a day of wearing the compression garment, body weight,  
28 episodes of infection previous 18 months, recurrence of cancer (in patients with history of cancer),  
29 adverse events and lymphatic transport.

30  
31  
32  
33  
34  
35  
36  
37  
38  
39  
40  
41  
42  
43  
44  
45  
46  
47  
48  
49  
50  
51  
52  
53  
54  
55  
56  
57  
58  
59  
60

Complications of surgery (in the intervention group) and information regarding usual care and self-  
management are collected during the trial period as well.

There is also a follow-up contact by phone at 9M and 15M, respectively. During the phone call,  
information is further collected about adverse events and complications of the surgery, about the  
usual care & self-management (to check for the adherence of the patient) and about the costs  
related to lymphoedema and its treatment.

To guarantee standardisation of the assessments all assessors are trained before the start of the trial.

### Sample size

The sample size is calculated to have at least 90% power to detect a difference between the  
intervention group receiving reconstructive surgery and the control group without surgery, on  
lymphoedema-specific QoL at 18 months, separately within patients with upper limb lymphoedema  
and within patients with lower limb lymphoedema. Both comparisons are considered as separate  
trials and therefore alpha has been set equal to 0.05.

1  
2  
3 The planned analysis to compare the groups is a constrained longitudinal data analysis (cLDA),(35)  
4 using the baseline measurement and the follow-up measurements after 1, 3, 6, 12 and 18 months as  
5 outcome. The primary analysis refers to the comparison after 18 months (based on a two-sided test  
6 with  $\alpha=0.05$ ). The approach is similar in spirit as an analysis of covariance (ANCOVA) but does not  
7 exclude subjects with one or more missing measurements. The calculation of the required sample  
8 size is based on an approach presented by Stroup.(36) Information with respect to variability of the  
9 lymphoedema-specific QoL score and the correlation between the timepoints was obtained from two  
10 retrospective series (130 patients with arm oedema and 83 patients with leg oedema).

11 The following assumptions have been made for the comparison of the lymphoedema-specific QoL:

- 12 - Standard deviation (SD) of the lymphoedema-specific QOL equal to 20
- 13 - Correlation between the baseline and each of the follow-up measurements equal to 0.50
- 14 - Drop-out of 5%, 10%, 15% and 20% after 1 and 3 months, 6 months, 12 months and 18, 24 and  
15 36 months, respectively

16 To detect a difference of 15 points, which is a clinical important difference,(14, 15) 36 subjects are  
17 required per group ( $2 \times 2 \times 36 = 144$  subjects in total for the two trials) to have at least 90% power. If the  
18 number of subjects would be reached before the end of the planned recruitment period of 24M,  
19 recruitment will continue up to 45 subjects per group (180 subjects for the whole study) to obtain  
20 more precise information, especially on the set of secondary outcomes. If the number is not attained,  
21 the recruitment period will be prolonged.

22  
23  
24  
25  
26  
27  
28  
29  
30  
31  
32  
33  
34  
35  
36  
37 The sample size estimation heavily depends on estimates of variability of the lymphoedema-specific  
38 QoL and the correlation with the baseline measurement. Therefore, after inclusion of 40 subjects per  
39 group the already available information will be used to verify if the assumptions were plausible (note  
40 however that there will be no information yet at the moment of the primary endpoint). If the  
41 observed standard deviation and correlations deviate from the assumed values such that the desired  
42 power level of 90% is not guaranteed anymore, an increase of the planned sample size will be  
43 considered (if feasible). At the moment of this blinded interim analysis for sample size re-estimation,  
44 the assumed dropout rates will also be verified. No interim analyses are planned to stop the study  
45 earlier for efficacy or futility, this to avoid loss of information on the secondary endpoints.

## 56 Data analyses

57 Statistical analysis will comply with the Consolidated Standards of Reporting Trials (CONSORT)  
58 guidelines. Analysis will be conducted in a blinded way. The continuous data will be summarised  
59  
60

1  
2  
3 using mean and SD and median and range values. Different analysis sets will be defined. The intent-  
4 to-treat analysis set (ITT) contains all randomised patients, grouped according to the allocated  
5 treatment. The modified intent-to-treat analysis set (mITT) contains all randomised patients grouped  
6 according to the allocated treatment, but excluding patients who have withdrawn their consent to  
7 the randomised procedure. The as-treated analysis set also contains all randomised patients but  
8 grouping the patients according to their received treatment. The per-protocol analysis set contains  
9 all randomised patients who received the allocated treatment. The main analyses will be performed  
10 on the ITT analysis set. Results on the other analysis sets will be reported additionally.  
11  
12  
13  
14  
15  
16  
17

### 18 *Primary outcome*

- 19 • Lymphoedema specific QoL

20  
21 A constrained longitudinal data analysis (cLDA)(35) using the baseline measurement and the follow-  
22 up measurements after 1 month, 3 months, 6 months, 12 months and 18 months as outcome will be  
23 used to compare the mean lymphoedema specific QoL after 18 months based on a two-sided test  
24 with  $\alpha=0.05$ . The choice of the covariance structure for the five measurements will be based on  
25 the Aikake criterion.(37) Study site is added as a fixed factor in this model. For patients with a  
26 recurrence of cancer in the root of the limb, only observations before the recurrence are included.  
27 Since the analysis is only valid under the missing at random (MAR) assumption (the probability of a  
28 missing lymphoedema-specific QoL measurement does not depend on the unobserved value),  
29 sensitivity analyses will be performed allowing a non-missing at random (NMAR) mechanism. More  
30 specifically, starting from the MAR model, a jump-to-reference (JR) and tipping-point (TP) analysis  
31 will be applied.(38)  
32  
33  
34  
35  
36  
37  
38  
39  
40  
41

### 42 *Key secondary outcomes*

- 43 • Change of limb volume:

44  
45 For the arm/ hand volume, ratios of the volume of the ipsilateral versus the contralateral side will be  
46 calculated. A multivariate model for the longitudinal measured ratios (7 timepoints) will be used to  
47 compare (changes in) log-transformed ratios between both groups. A log transformation for the  
48 ratios is used since intervals between units are not equidistant. For the leg/ foot volume, the same  
49 model will be used but on the original measurements of the (most) affected limb instead of on the  
50 (log-transformed) ratios versus the contralateral side (since also patients with bilateral leg volume  
51 are included).  
52  
53  
54  
55  
56

- 57 • Duration of wearing the compression garment:

58 The same modelling approach will be used as for the primary outcome.  
59  
60

### *Other secondary outcomes*

Continuous outcomes will be analysed in a similar way as the primary outcome. Categorical (binary) data will be analysed using stratified  $\chi^2$  test and logistic regression models with general estimating equations (GEE) for repeatedly measured binary data. Adverse events and complications after surgery will be reported descriptively.

This study has been designed to permit *economic analysis* in a later phase. If reconstructive surgery is deemed superior to no surgery (i.e. is clinically effective), the next step is to investigate its cost-effectiveness by determining the incremental cost-effectiveness ratio (ICER). To determine the ICER, the costs from a healthcare payer's perspective and from a societal perspective will be considered, as well as the effectiveness by using the EQ-5D-5L questionnaire. If reconstructive surgery is proven cost-effective, the budget impact will be calculated from a reimburse perspective.

### *Exploratory analyses*

Subgroup analyses for the primary outcome will be considered as a function of stage (stage 1 versus 2a/ 2b), primary vs secondary lymphoedema, weight (normal weight (BMI  $\leq$  25) versus overweight (BMI  $>$  25)) and combination of reconstructive techniques (combination of LVA/ LNT versus only LVA or only LNT)

Moreover, a multivariable model will be constructed to predict the lymphoedema-specific QoL at 36 months based on 14 baseline variables. For subjects with a missing lymphoedema-specific QoL at 36 months, values will be imputed based on a multivariate longitudinal model for the lymphoedema-specific QoL measurements. A model reduction will be performed on a stacked dataset consisting of the multiple imputed data (at least 10 imputations), using a weighting scheme to account for the fraction of missing data in each covariate.<sup>(39)</sup> Considering the dropouts at 36 months, data for lymphoedema-specific QoL of 144 patients will be available.

### **Data security and management**

A study-specific Data Management Plan has been developed by the data management team. Participant data are stored on a secure database in accordance with the General Data Protection Regulations (2018). Data are de-identified and a unique trial identification number is used on all source documents. These source documents are being checked for completeness and congruity

1  
2  
3 before data entry into REDCap. All trial documentation and data will be archived for at least 20 years  
4 after completion of the trial.  
5

6  
7 A Risk Assessment Plan has also been made with a summary of the concerns in the trial, how they  
8 were mitigated, the probability that this will occur and its impact. This finally leads to a risk score  
9 (low, medium, high, critical). The concerns with highest risks are discussed during the meeting of the  
10 Trial Steering Committee (during recruitment period: once each 6M; thereafter: once a year).  
11  
12  
13  
14  
15  
16

### 17 **Trial monitoring**

18  
19 A separate Monitoring plan has been constructed and will be conducted periodically by trial monitors  
20 (independent from trial staff). The first monitoring visit at each site will be conducted within 4-8  
21 weeks following the baseline visit of the first study subject at that site. Thereafter, monitoring visits  
22 will be organized at mean intervals of 6 months during recruitment, and mean intervals of 12 months  
23 thereafter. The participating site will provide direct access to the trial data and to the corresponding  
24 source data and documents. The trial will be monitored to ensure that it is being conducted in  
25 compliance with GCP and current legislation, that written informed consent has been obtained  
26 correctly, that the trial procedures have been followed as shown in the protocol, and that the data  
27 have been recorded, for which the source data will be compared with the data recorded in REDCap.  
28  
29  
30  
31  
32  
33  
34  
35  
36

### 37 **ETHICS AND DISSEMINATION**

38  
39 The SurLym trial will be conducted in compliance with the principles of the Declaration of Helsinki,  
40 the principles of GCP and in accordance with all applicable regulatory requirements. Approval has  
41 been obtained for the study protocol, the informed consent forms and other related documents by  
42 the main Ethical Committee of UZ Leuven (S631212) and the local Ethical Committees of UZ Gent and  
43 CHU UCL Namur. Any subsequent protocol amendments will be submitted to the Ethical Committee.  
44  
45 Furthermore, the study is approved by the Federal Agency for Medicines and Health Products  
46 (EudraCT: 2021-000397-29).  
47  
48  
49  
50  
51  
52  
53

### 54 **Dissemination of results**

55  
56 The results of the study owned by the sponsor shall be disseminated as soon as possible after the  
57 end of the trial, by disclosing them to the public by appropriate means, including publications in  
58  
59  
60

1  
2  
3 peer-reviewed scientific journals and presentations at congresses and events. Open access will be  
4 ensured to all peer-reviewed scientific publications relating to the results of the study.  
5  
6  
7  
8

### 9 **Acknowledgements**

10  
11 We are grateful to all medical doctors for referring potential participants for inclusion in the trial. We  
12 also want to thank the data management team and the representative of the clinical trial center of  
13 UZ Leuven for their support. Finally, we are thankful to the patients of the advisory board and to the  
14 independent expert for their valuable advises in the preparation phase and during the course of the  
15 trial.  
16  
17  
18  
19

### 20 **Author contributions**

21  
22 ND is the chief investigator of the SurLym trial. TDV is the trial manager. ND, CR, TD are the principle  
23 investigators of the 3 study sites. SF is the statistician. LG is expert in occupational medicine and will  
24 supervise the economic analysis (if executed). ND, AKH, ST, BBH, IF, VVB, TDC, MDS, CR, CM, JF, TD  
25 will perform the recruitment of patients. ST, KS, PF, MS, AB, BDP, LD will perform the surgical  
26 procedures and follow-up. AKH, JF, VVB, TDC, MDS are responsible for the clinical assessments  
27 (including lymphofluoroscopy and lymphoscintigraphy). GM, FK, AF, DD are the radiologists  
28 responsible for the lymph MRI an BK is a nuclear medicine physician responsible for the  
29 lymphoscintigraphy. JM, SS, GP, KVL are the independent experts in reconstructive lymphatic surgery  
30 and will verify the quality of the surgical procedures. ND drafted the manuscript. All authors  
31 contributed to the establishment of the protocol, revised the manuscript and provided input  
32 according to their area of expertise.  
33  
34  
35  
36  
37  
38  
39  
40  
41  
42  
43  
44  
45  
46

### 47 **Funding statement**

48  
49 This study (KCE19-1245) is an independent research study funded by the Belgian Health Care  
50 Knowledge Centre under the KCE Trials Programme. The views expressed in this publication are  
51 those of the author(s) and not necessarily those of Belgian Health Care Knowledge Centre.  
52  
53  
54  
55

### 56 **Data statement**

57  
58 Data will be available on reasonable request.  
59  
60



## Competing interests

None declared

## Ethics approval

Approval is obtained by the central Ethical Committee of the University Hospitals Leuven (S63212) and by the local Ethical Committees of UZ Gent (BC-09711) and CHU UCL Namur (43/2021).

## Figure legend

Figure 1 Flow diagram of the SurLym trial.

## Supplemental material

Appendix Overview of the different variables and outcomes in the SurLym trial, the assessment method and the description of the method

## References

1. Fu MR, Ridner SH, Hu SH, Stewart BR, Cormier JN, Armer JM. Psychosocial impact of lymphedema: a systematic review of literature from 2004 to 2011. *Psychooncology*. 2013;22(7):1466-84.
2. Mercier G, Pastor J, Moffatt C, Franks P, Quere I. LIMPRINT: Health-Related Quality of Life in Adult Patients with Chronic Edema. *Lymphat Res Biol*. 2019;17(2):163-7.
3. Neubauer M, Schoberwalter D, Cenik F, Keilani M, Crevenna R. Lymphedema and employability - Review and results of a survey of Austrian experts. *Wien Klin Wochenschr*. 2017;129(5-6):186-91.
4. Damstra RJ, Halk AB. The Dutch lymphedema guidelines based on the International Classification of Functioning, Disability, and Health and the chronic care model. *J Vasc Surg Venous Lymphat Disord*. 2017;5(5):756-65.
5. Executive Committee of the International Society of L. The diagnosis and treatment of peripheral lymphedema: 2020 Consensus Document of the International Society of Lymphology. *Lymphology*. 2020;53(1):3-19.
6. Kung TA, Champaneria MC, Maki JH, Neligan PC. Current Concepts in the Surgical Management of Lymphedema. *Plast Reconstr Surg*. 2017;139(4):1003e-13e.
7. Chang DW, Masia J, Garza R, 3rd, Skoracki R, Neligan PC. Lymphedema: Surgical and Medical Therapy. *Plast Reconstr Surg*. 2016;138(3 Suppl):209s-18s.

- 1
  - 2
  - 3
  - 4
  - 5
  - 6
  - 7
  - 8
  - 9
  - 10
  - 11
  - 12
  - 13
  - 14
  - 15
  - 16
  - 17
  - 18
  - 19
  - 20
  - 21
  - 22
  - 23
  - 24
  - 25
  - 26
  - 27
  - 28
  - 29
  - 30
  - 31
  - 32
  - 33
  - 34
  - 35
  - 36
  - 37
  - 38
  - 39
  - 40
  - 41
  - 42
  - 43
  - 44
  - 45
  - 46
  - 47
  - 48
  - 49
  - 50
  - 51
  - 52
  - 53
  - 54
  - 55
  - 56
  - 57
  - 58
  - 59
  - 60
8. Jeong HH, Yoon IA, Al-Shomer FM, Suh HP, Pak CJ, Neligan P, et al. Decompression of Axillary vein - An essential adjunct for advanced lymphedema. *Plast Reconstr Surg.* 2023.
9. Gould DJ, Mehrara BJ, Neligan P, Cheng MH, Patel KM. Lymph node transplantation for the treatment of lymphedema. *J Surg Oncol.* 2018;118(5):736-42.
10. Markkula SP, Leung N, Allen VB, Furniss D. Surgical interventions for the prevention or treatment of lymphoedema after breast cancer treatment. *Cochrane Database Syst Rev.* 2019;2:Cd011433.
11. Dionyssiou D, Demiri E, Tsimponis A, Sarafis A, Mpalaris V, Tatsidou G, et al. A randomized control study of treating secondary stage II breast cancer-related lymphoedema with free lymph node transfer. *Breast Cancer Res Treat.* 2016;156(1):73-9.
12. De Vrieze T, Fripiat J, Deltombe T, Gebruers N, Tjalma WAA, Nevelsteen I, et al. Cross-cultural validation of the French version of the Lymphedema Functioning, Disability and Health Questionnaire for Upper Limb Lymphedema (Lymph-ICF-UL). *Disabil Rehabil.* 2020:1-8.
13. De Vrieze T, Gebruers N, Nevelsteen I, Tjalma WAA, Thomis S, De Groef A, et al. Responsiveness of the Lymphedema Functioning, Disability, and Health Questionnaire for Upper Limb Lymphedema in Patients with Breast Cancer-Related Lymphedema. *Lymphat Res Biol.* 2020.
14. De Vrieze T, Vos L, Gebruers N, De Groef A, Dams L, Van der Gucht E, et al. Revision of the Lymphedema Functioning, Disability and Health Questionnaire for Upper Limb Lymphedema (Lymph-ICF-UL): Reliability and Validity. *Lymphat Res Biol.* 2019;17(3):347-55.
15. Devoogdt N, De Groef A, Hendrickx A, Damstra RJ, Christiaansen A, Geraerts I, et al. Lymphedema Functioning, Disability and Health Questionnaire for Lower Limb Lymphedema (Lymph-ICF-LL): Reliability and Validity. *Physical therapy.* 2014.
16. Devoogdt N, Partsch H, Heroes AK, De Vrieze T, De Groef A, Geraerts I, et al. The ICC Compression Questionnaire: A Comprehensive Tool to Evaluate Compression Materials or Devices Applied in Subjects with Lymphedema or Chronic Venous Disease. *Lymphat Res Biol.* 2021.
17. EuroQol--a new facility for the measurement of health-related quality of life. *Health Policy.* 1990;16(3):199-208.
18. Reilly MC, Zbrozek AS, Dukes EM. The validity and reproducibility of a work productivity and activity impairment instrument. *Pharmacoeconomics.* 1993;4(5):353-65.
19. Goorts K, Vandenbroeck S, Vander Elst T, Rusu D, Du Bois M, Decuman S, et al. Quicksan assesses risk factors of long-term sickness absence: A cross-sectional (factorial) construct validation study. *PloS one.* 2019;14(1):e0210359.
20. Ainsworth BE, Macera CA, Jones DA, Reis JP, Addy CL, Bowles HR, et al. Comparison of the 2001 BRFSS and the IPAQ Physical Activity Questionnaires. *Med Sci Sports Exerc.* 2006;38(9):1584-92.
21. De Vrieze T, Gebruers N, Tjalma WA, Nevelsteen I, Thomis S, De Groef A, et al. What is the best method to determine excessive arm volume in patients with breast cancer-related lymphoedema in clinical practice? Reliability, time efficiency and clinical feasibility of five different methods. *Clin Rehabil.* 2019;33(7):1221-32.
22. Devoogdt N, Cavaggion C, Van der Gucht E, Dams L, De Groef A, Meeus M, et al. Reliability, Validity, and Feasibility of Water Displacement Method, Figure-of-Eight Method, and Circumference Measurements in Determination of Ankle and Foot Edema. *Lymphat Res Biol.* 2019;17(5):531-6.
23. Devoogdt N, Lemkens H, Geraerts I, Van Nuland I, Flour M, Coremans T, et al. A new device to measure upper limb circumferences: reliability and validity. *Int Angiol.* 2010;(in publication).
24. Hidding JT, Viehoff PB, Beurskens CH, van Laarhoven HW, Nijhuis-van der Sanden MW, van der Wees PJ. Measurement Properties of Instruments for Measuring of Lymphedema: Systematic Review. *Phys Ther.* 2016;96(12):1965-81.
25. Farrell K, Johnson A, Duncan H, Offenbacker T, Curry C. The intertester and intratester reliability of hand volumetrics. *J Hand Ther.* 2003;16(4):292-9.
26. Thomis S, Dams L, Fourneau I, De Vrieze T, Nevelsteen I, Neven P, et al. Correlation Between Clinical Assessment and Lymphofluoroscopy in Patients with Breast Cancer-Related Lymphedema: A Study of Concurrent Validity. *Lymphat Res Biol.* 2020.

- 1
  - 2
  - 3
  - 4
  - 5
  - 6
  - 7
  - 8
  - 9
  - 10
  - 11
  - 12
  - 13
  - 14
  - 15
  - 16
  - 17
  - 18
  - 19
  - 20
  - 21
  - 22
  - 23
  - 24
  - 25
  - 26
  - 27
  - 28
  - 29
  - 30
  - 31
  - 32
  - 33
  - 34
  - 35
  - 36
  - 37
  - 38
  - 39
  - 40
  - 41
  - 42
  - 43
  - 44
  - 45
  - 46
  - 47
  - 48
  - 49
  - 50
  - 51
  - 52
  - 53
  - 54
  - 55
  - 56
  - 57
  - 58
  - 59
  - 60
27. Devoogdt N, Van den Wyngaert T, Bourgeois P, Lambrechts M, Van Kampen M, De Groef A, et al. Reproducibility of lymphoscintigraphic evaluation of the upper limb. *Lymphat Res Biol*. 2014;12(3):175-84.
28. Villa G, Campisi CC, Ryan M, Boccardo F, Di Summa P, Frascio M, et al. Procedural Recommendations for Lymphoscintigraphy in the Diagnosis of Peripheral Lymphedema: the Genoa Protocol. *Nucl Med Mol Imaging*. 2019;53(1):47-56.
29. Chan AW, Tetzlaff JM, Altman DG, Laupacis A, Gotzsche PC, Krleza-Jeric K, et al. SPIRIT 2013 statement: defining standard protocol items for clinical trials. *Ann Intern Med*. 2013;158(3):200-7.
30. De Vrieze T, Gebruers N, Nevelsteen I, De Groef A, Tjalma WAA, Thomis S, et al. Reliability of the MoistureMeterD Compact Device and the Pitting Test to Evaluate Local Tissue Water in Subjects with Breast Cancer-Related Lymphedema. *Lymphat Res Biol*. 2019.
31. Tan IC, Maus EA, Rasmussen JC, Marshall MV, Adams KE, Fife CE, et al. Assessment of lymphatic contractile function after manual lymphatic drainage using near-infrared fluorescence imaging. *Arch Phys Med Rehabil*. 2011;92(5):756-64.e1.
32. Atkinson TM, Wagner JS, Basch E. Trustworthiness of Patient-Reported Outcomes in Unblinded Cancer Clinical Trials. *JAMA Oncol*. 2017;3(6):738-9.
33. Chang DW, Dayan J, Greene AK, MacDonald JK, Masia J, Mehrara B, et al. Surgical Treatment of Lymphedema: A Systematic Review and Meta-Analysis of Controlled Trials. Results of a Consensus Conference. *Plast Reconstr Surg*. 2021;147(4):975-93.
34. Devoogdt N, Van Kampen M, Geraerts I, Coremans T, Christiaens MR. Lymphoedema Functioning, Disability and Health questionnaire (Lymph-ICF): reliability and validity. *Phys Ther*. 2011;91(6):944-57.
35. Liang KY, Zeger S. Longitudinal data analysis of continuous and discrete responses for pre-post designs. *Sankhya: The Indian Journal of Statistics*. 2000;Series B 62:134-48.
36. Stroup WW. Mixed model procedures to assess power, precision, and sample size in the design of experiments. : *Proc. Biopharmaceutical Section. Am. Stat. Assoc.*; 1999.
37. Fitzmaurice GM. Longitudinal data analysis. Boca Raton: CRC Press; 2009. xiv, 618 p. p.
38. Molenberghs G, Fitzmaurice GM, Kenward MG, Tsiatis AA, Verbeke G. Handbook of missing data methodology. Boca Raton: CRC Press, Taylor & Francis Group; 2015. xxiv, 574 pages p.
39. Wood AM, White IR, Royston P. How should variable selection be performed with multiply imputed data? *Stat Med*. 2008;27:3227-46.



Figure 1. Flow diagram of SurLym trial

321x456mm (47 x 47 DPI)

## Appendix Overview of the different variables and outcomes in the SurLym trial, the assessment method and the description of the method

| Variable                                                                                                   | Assessment method; description of method                                                                                                                                                                                                                                                                                                 |
|------------------------------------------------------------------------------------------------------------|------------------------------------------------------------------------------------------------------------------------------------------------------------------------------------------------------------------------------------------------------------------------------------------------------------------------------------------|
| <b>Descriptives (15 min)</b>                                                                               |                                                                                                                                                                                                                                                                                                                                          |
| Demographics                                                                                               |                                                                                                                                                                                                                                                                                                                                          |
| Age (in years)                                                                                             | Medical file                                                                                                                                                                                                                                                                                                                             |
| Gender (man vs women),<br>smoking status (smoking vs<br>non-smoking), living status<br>(alone vs together) | Interview                                                                                                                                                                                                                                                                                                                                |
| Body height (in m)                                                                                         | Stadiometer                                                                                                                                                                                                                                                                                                                              |
| Comorbidity (yes vs no)                                                                                    | Self-reported questionnaire developed by IDEWE (= external institute for prevention and protection at work); presence of<br>wound by accident, of disease of musculoskeletal, circulatory, respiratory, neurological, digestive, urinary system, of<br>disease of blood or skin, of mental or metabolic problems or of tumor (yes vs no) |
| Educational level (low vs<br>high)                                                                         | Interview; lower education = primary and secondary school, higher education = non-university higher and university                                                                                                                                                                                                                       |
| Anxiety and depression (0-<br>42)                                                                          | Self-reported Hospital Anxiety and Depression Scale; 14 statements regarding anxiety and depression with score 0-3                                                                                                                                                                                                                       |

1  
2  
3 Characteristics of  
4 lymphoedema and its  
5 treatment  
6  
7

8  
9 Duration of lymphoedema  
10 (in months)  
11

Interview

12  
13  
14 Localisation of  
15 lymphoedema (yes vs no)  
16  
17

Inspection; for upper limb lymphoedema: hand/ lower arm/ upper arm/ trunk or

for lower limb lymphoedema: foot/ lower leg/ upper leg/ pelvic/ genital region, unilateral/ bilateral, site of lymphoedema  
followed in trial: left/ right

18  
19  
20 Pitting status (yes vs no)  
21  
22

Palpation; for upper limb lymphoedema: hand/ lower arm/ upper arm/ trunk or for lower limb lymphoedema: Foot/ lower  
leg/ upper leg/ pelvic/ genital region

23  
24 Stage of lymphoedema (1  
25 vs 2a vs 2b)  
26

Inspection en palpation; Stage 1= pitting oedema that disappears with limb elevation (= reversible), 2a= pitting oedema  
that does not disappear completely with limb elevation, 2b= further decrease of pitting and accumulation of fat tissue

27  
28 Primary or secondary  
29 lymphoedema  
30

Interview and medical file; Primary = congenital; secondary = acquired after cancer-treatment (and type of cancer),  
trauma, surgery, infection

31  
32 History of conservative  
33 treatment  
34

Self-reported questionnaire (developed by author); Information regarding 1) physical therapy: number of years, number of  
sessions last month/ year, content, 2) intensive treatment: where, how often, 3) other care giver, 4) self-management

---

35 **Primary outcome**  
36  
37  
38  
39  
40  
41  
42  
43  
44  
45  
46

---

---

 Self-reported questionnaire

(5 min)

 Lymphoedema-specific  
 QoL (0-100)

 Lymph-ICF questionnaire Dutch or French version for upper or lower limb lymphoedema;(12-15) 28 and 29 questions on  
 11-point scale between 0-10, total score between 0-100 (0= no problems in functioning related to the development of  
 lymphoedema)

---

**Secondary outcomes**


---

## Self-reported questionnaires

(60 min)

 Lymphoedema-specific  
 QoL (0-100)

 See primary outcome; in addition, score on 5 domains, i.e. physical function, mental function, household, mobility and life  
 and social life domain (0-100)

 Duration (key secondary  
 outcome) and experience  
 of wearing compression  
 garment

 ICC compression questionnaire;(16) Dosage (0-168 hours/ week), application/ removing compression (0-10), comfort  
 (score between 0-10), complication (score between 0-10), general experience (0-10)

Health related QoL

 EuroQoL-5D-5L;(17) 5 items about mobility, self-care, activity, pain and anxiety (each dimension has 5 levels: no problems,  
 slight problems, moderate problems, severe problems and extreme problems), range between -0.33 for situation '33333'  
 (severe problems on all items) and 1 for situation '11111' (complete healthy)

Work capacity and ability

 Work Productivity and Activity Impairment questionnaire (WPAI-GH);(18) Impairment while working due to health, overall  
 work impairment due to health, activity impairment due to health (%)

|    |                         |                                                                                                                                                                                       |
|----|-------------------------|---------------------------------------------------------------------------------------------------------------------------------------------------------------------------------------|
| 1  |                         |                                                                                                                                                                                       |
| 2  |                         |                                                                                                                                                                                       |
| 3  |                         | QuickScan 18 – short version;(19) Chance for successful socio-professional reintegration (score between 0 certainly not                                                               |
| 4  |                         | and 5 certainly yes)                                                                                                                                                                  |
| 5  |                         |                                                                                                                                                                                       |
| 6  |                         |                                                                                                                                                                                       |
| 7  | Physical activity level | International Physical Activity Questionnaire;(20) 7 questions about hours a week of vigorous (8 MET), moderate (4 MET)                                                               |
| 8  | (MET-hours a week)      | and walking activities (3.3 MET), and sitting time                                                                                                                                    |
| 9  |                         |                                                                                                                                                                                       |
| 10 |                         |                                                                                                                                                                                       |
| 11 | Costs related to        | Study-specific questionnaire completed monthly by the patient; collection of patient and health care costs for material                                                               |
| 12 | lymphoedema and its     | (such as compression or exercise material), medication, diagnostics or care giver (similar questionnaire as for Effort-BCRL                                                           |
| 13 | treatment (in euro)     | trial)                                                                                                                                                                                |
| 14 |                         |                                                                                                                                                                                       |
| 15 |                         |                                                                                                                                                                                       |
| 16 | Usual care & self-      |                                                                                                                                                                                       |
| 17 | management §, including | Study-specific usual care & self-management questionnaire completed monthly by the patient; information regarding 1)                                                                  |
| 18 | need for intensive      | physical therapy: number of sessions, duration and content; 2) intensive treatment: where, number of sessions, content;                                                               |
| 19 | treatment               | 3) other care giver; 4) self-management: number of days of each modality                                                                                                              |
| 20 |                         |                                                                                                                                                                                       |
| 21 |                         |                                                                                                                                                                                       |
| 22 |                         |                                                                                                                                                                                       |
| 23 |                         |                                                                                                                                                                                       |
| 24 | Assessment (60 min)     |                                                                                                                                                                                       |
| 25 |                         |                                                                                                                                                                                       |
| 26 |                         |                                                                                                                                                                                       |
| 27 |                         | Circumference measurements every 4 cm with perimeter;(21-24) limb volume is calculated with formula of truncated                                                                      |
| 28 | Limb volume (key        | cone, in participants with upper limb lymphoedema: assessment of affected and non-affected arm; outcome is excessive                                                                  |
| 29 | secondary outcome)      | arm volume (%) = $(\text{volume}_{\text{AFFECTED ARM}} - \text{volume}_{\text{UNAFFECTED ARM}} / \text{volume}_{\text{UNAFFECTED ARM}}) \times 100$ , in participants with lower limb |
| 30 |                         | lymphoedema: assessment of affected leg (= leg that is followed in trial); outcome is whole leg volume (in ml)                                                                        |
| 31 |                         |                                                                                                                                                                                       |
| 32 |                         |                                                                                                                                                                                       |
| 33 |                         | Water displacement method of hand or foot;(22, 25) volume is the mass of the displaced water, in participants with upper                                                              |
| 34 |                         | limb lymphoedema: assessment of affected and non-affected hand, outcome is excessive hand volume (%); in participants                                                                 |
| 35 | Hand/ foot volume       | with lower limb lymphoedema: assessment of affected foot, outcome is foot volume (in ml)                                                                                              |
| 36 |                         |                                                                                                                                                                                       |
| 37 |                         |                                                                                                                                                                                       |
| 38 |                         |                                                                                                                                                                                       |
| 39 |                         |                                                                                                                                                                                       |
| 40 |                         |                                                                                                                                                                                       |
| 41 |                         |                                                                                                                                                                                       |
| 42 |                         |                                                                                                                                                                                       |
| 43 |                         |                                                                                                                                                                                       |
| 44 |                         |                                                                                                                                                                                       |
| 45 |                         |                                                                                                                                                                                       |
| 46 |                         |                                                                                                                                                                                       |



|    |                             |                                                                                                                           |
|----|-----------------------------|---------------------------------------------------------------------------------------------------------------------------|
| 1  |                             |                                                                                                                           |
| 2  |                             |                                                                                                                           |
| 3  | Failure to reduce hours a   |                                                                                                                           |
| 4  | day of wearing              | Assessor determines whether participant is able to reduce the hours a day of wearing the compression garment as stated    |
| 5  | compression stocking (yes,  | by the protocol (see figure 1, M7-12); Not able = excessive arm volume/ leg volume increased more than the smallest real  |
| 6  | not able vs no, able)       | difference, i.e. 5% or more compared to baseline(14)                                                                      |
| 7  |                             |                                                                                                                           |
| 8  |                             |                                                                                                                           |
| 9  |                             |                                                                                                                           |
| 10 | Body weight (in kg)         | Scale                                                                                                                     |
| 11 |                             |                                                                                                                           |
| 12 | Infection previous 18       |                                                                                                                           |
| 13 | months (number)             | Interview                                                                                                                 |
| 14 |                             |                                                                                                                           |
| 15 | Recurrence of cancer (yes/  |                                                                                                                           |
| 16 | no)                         | Interview and medical file; only collected in the group with history of cancer                                            |
| 17 |                             |                                                                                                                           |
| 18 |                             |                                                                                                                           |
| 19 |                             |                                                                                                                           |
| 20 |                             |                                                                                                                           |
| 21 | Adverse events (whole       | Interview and medical file; registration of adverse events related to pre-surgical or study-specific investigations: ICG  |
| 22 | group) and complications    | fluoroscopy, lymphoscintigraphy, lymph MRI, CT angiography, of complications of reconstructive lymphatic surgery: 1) in   |
| 23 | of surgery (in intervention | general blue spot, wound healing problem, infection of wound, decrease of sensibility around wound, erysipelas of limb,   |
| 24 | group) (yes/ no)            | deep venous thrombosis, 2) LNT-specific seroma, lymphocele, donor site lymphoedema, loss of flap                          |
| 25 |                             |                                                                                                                           |
| 26 |                             |                                                                                                                           |
| 27 |                             |                                                                                                                           |
| 28 |                             | Study-specific questionnaire completed by the compression specialist after delivery of compression material; registration |
| 29 | Costs related to            | of company, compression product, region of compression, type, compression class, cost for health insurance/ patient       |
| 30 | lymphoedema and its         |                                                                                                                           |
| 31 | treatment (in euro)         | Inter Mutuality Agency (IMA) database (= agency collecting data from different mutual health insurance companies),        |
| 32 |                             | based on national number of the study participant                                                                         |
| 33 |                             |                                                                                                                           |
| 34 |                             |                                                                                                                           |
| 35 |                             |                                                                                                                           |
| 36 | Lymphatic transport         |                                                                                                                           |
| 37 |                             |                                                                                                                           |
| 38 |                             |                                                                                                                           |
| 39 |                             |                                                                                                                           |
| 40 |                             |                                                                                                                           |
| 41 |                             |                                                                                                                           |
| 42 |                             |                                                                                                                           |
| 43 |                             |                                                                                                                           |
| 44 |                             |                                                                                                                           |
| 45 |                             |                                                                                                                           |
| 46 |                             |                                                                                                                           |

1  
2  
3  
4  
5  
6 ICG fluoroscopy (60 min)  
7  
8  
9  
10  
11  
12  
13  
14  
15  
16  
17  
18  
19  
20  
21  
22  
23  
24  
25  
26  
27  
28  
29  
30  
31  
32  
33  
34  
35  
36  
37  
38  
39  
40  
41  
42  
43  
44  
45  
46

ICG fluoroscopy;(26) 0.2 ml dilution of ICG/ aqua/ NaCl is injected intradermally in 1<sup>st</sup> and 4<sup>th</sup> web of affected hand or foot; procedure consist of 3 minutes of rest, 5 minutes of stimulation and registration of outcomes (=early phase) and a break until 90 minutes post-injection and again registration of outcomes (= late phase); registration of following outcomes: 1) transport out of injection sites (yes/ no), 2) dermal rerouting (no, splash, stardust and diffuse for predefined regions on arm/ leg), 3) transport out of dermal rerouting, 4) lymph nodes (yes/ no)

Lymphoscintigraphy (60 min)

Lymphoscintigraphy;(27, 28) 55MBq <sup>99m</sup>Tc nanocolloids are injected intradermally in 1<sup>st</sup> web of both hands or feet; procedure consist of following steps: 1) 25 minutes of rest, 2) 5 minutes of arm/ leg cycling and 3) early phase acquisition; 4) 60 minutes break; 5) late phase acquisition; following images are made: before and after rest an image of injection sites and at the end (outcome: extraction out of injection sites in %), after rest, cycling and at the end a mini whole body (outcomes: number of lymph nodes, intensity of lymph collectors, intensity of dermal backflow, presence of lymph collaterals), during 25 minutes of rest dynamic images of axilla/ arm or groin/ leg (outcomes: arrival time and uptake in axilla/ inguinal region in %); in addition transport index is determined, based on transport kinetics, distribution of tracer, time to visualize lymph nodes and visualization of lymph nodes/ vessels

---

§ No secondary outcome

# Reporting checklist for protocol of a clinical trial.

Based on the SPIRIT guidelines.

## Instructions to authors

Complete this checklist by entering the page numbers from your manuscript where readers will find each of the items listed below.

Your article may not currently address all the items on the checklist. Please modify your text to include the missing information. If you are certain that an item does not apply, please write "n/a" and provide a short explanation.

Upload your completed checklist as an extra file when you submit to a journal.

In your methods section, say that you used the SPIRIT reporting guidelines, and cite them as:

Chan A-W, Tetzlaff JM, Gøtzsche PC, Altman DG, Mann H, Berlin J, Dickersin K, Hróbjartsson A, Schulz KF, Parulekar WR, Krleža-Jerić K, Laupacis A, Moher D. SPIRIT 2013 Explanation and Elaboration: Guidance for protocols of clinical trials. *BMJ*. 2013;346:e7586

Reporting Item

Page Number

### Administrative information

|       |                    |                                                                                                              |          |
|-------|--------------------|--------------------------------------------------------------------------------------------------------------|----------|
| Title | <a href="#">#1</a> | Descriptive title identifying the study design, population, interventions, and, if applicable, trial acronym | Paper p1 |
|-------|--------------------|--------------------------------------------------------------------------------------------------------------|----------|

For peer review only - <http://bmjopen.bmj.com/site/about/guidelines.xhtml>

|    |                              |                     |                                                                          |                  |
|----|------------------------------|---------------------|--------------------------------------------------------------------------|------------------|
| 1  | Trial registration           | <a href="#">#2a</a> | Trial identifier and registry name. If not yet registered, name of       | Paper p3         |
| 2  |                              |                     | intended registry                                                        |                  |
| 3  |                              |                     |                                                                          |                  |
| 4  |                              |                     |                                                                          |                  |
| 5  |                              |                     |                                                                          |                  |
| 6  | Trial registration: data set | <a href="#">#2b</a> | All items from the World Health Organization Trial Registration Data     | Paper p3         |
| 7  |                              |                     | Set                                                                      |                  |
| 8  |                              |                     |                                                                          |                  |
| 9  |                              |                     |                                                                          |                  |
| 10 |                              |                     |                                                                          |                  |
| 11 | Protocol version             | <a href="#">#3</a>  | Date and version identifier                                              | Paper p3         |
| 12 |                              |                     |                                                                          |                  |
| 13 |                              |                     |                                                                          |                  |
| 14 |                              |                     |                                                                          |                  |
| 15 | Funding                      | <a href="#">#4</a>  | Sources and types of financial, material, and other support              | Paper p3, study  |
| 16 |                              |                     |                                                                          | agreement KCE-UZ |
| 17 |                              |                     |                                                                          | Leuven           |
| 18 |                              |                     |                                                                          |                  |
| 19 |                              |                     |                                                                          |                  |
| 20 |                              |                     |                                                                          |                  |
| 21 |                              |                     |                                                                          |                  |
| 22 | Roles and responsibilities:  | <a href="#">#5a</a> | Names, affiliations, and roles of protocol contributors                  | Paper p30        |
| 23 | contributorship              |                     |                                                                          |                  |
| 24 |                              |                     |                                                                          |                  |
| 25 |                              |                     |                                                                          |                  |
| 26 |                              |                     |                                                                          |                  |
| 27 |                              |                     |                                                                          |                  |
| 28 | Roles and responsibilities:  | <a href="#">#5b</a> | Name and contact information for the trial sponsor                       | Paper p3         |
| 29 | sponsor contact              |                     |                                                                          |                  |
| 30 |                              |                     |                                                                          |                  |
| 31 |                              |                     |                                                                          |                  |
| 32 | information                  |                     |                                                                          |                  |
| 33 |                              |                     |                                                                          |                  |
| 34 |                              |                     |                                                                          |                  |
| 35 |                              |                     |                                                                          |                  |
| 36 | Roles and responsibilities:  | <a href="#">#5c</a> | Role of study sponsor and funders, if any, in study design; collection,  | Protocol v3.0 p9 |
| 37 | sponsor and funder           |                     | management, analysis, and interpretation of data; writing of the         |                  |
| 38 |                              |                     | report; and the decision to submit the report for publication, including |                  |
| 39 |                              |                     | whether they will have ultimate authority over any of these activities   |                  |
| 40 |                              |                     |                                                                          |                  |
| 41 |                              |                     |                                                                          |                  |
| 42 |                              |                     |                                                                          |                  |
| 43 |                              |                     |                                                                          |                  |
| 44 |                              |                     |                                                                          |                  |

1 Roles and responsibilities: [#5d](#) Composition, roles, and responsibilities of the coordinating centre, Protocol v3.0 p10  
2 committees  
3 steering committee, endpoint adjudication committee, data  
4 management team, and other individuals or groups overseeing the  
5 trial, if applicable (see Item 21a for data monitoring committee)  
6  
7  
8  
9

## 10 Introduction

11  
12  
13  
14 Background and rationale [#6a](#) Description of research question and justification for undertaking the Paper p7  
15 trial, including summary of relevant studies (published and  
16 unpublished) examining benefits and harms for each intervention  
17  
18  
19  
20

21  
22 Background and rationale: [#6b](#) Explanation for choice of comparators Paper p6  
23 choice of comparators  
24  
25  
26

27 Objectives [#7](#) Specific objectives or hypotheses Paper p7  
28  
29

30 Trial design [#8](#) Description of trial design including type of trial (eg, parallel group, Paper p9  
31 crossover, factorial, single group), allocation ratio, and framework  
32 (eg, superiority, equivalence, non-inferiority, exploratory)  
33  
34  
35  
36  
37

38 **Methods: Participants,**  
39  
40 **interventions, and**  
41  
42 **outcomes**  
43

|    |                            |                      |                                                                           |                          |
|----|----------------------------|----------------------|---------------------------------------------------------------------------|--------------------------|
| 1  | Study setting              | <a href="#">#9</a>   | Description of study settings (eg, community clinic, academic             | Paper p9                 |
| 2  |                            |                      | hospital) and list of countries where data will be collected. Reference   |                          |
| 3  |                            |                      | to where list of study sites can be obtained                              |                          |
| 4  |                            |                      |                                                                           |                          |
| 5  |                            |                      |                                                                           |                          |
| 6  |                            |                      |                                                                           |                          |
| 7  |                            |                      |                                                                           |                          |
| 8  | Eligibility criteria       | <a href="#">#10</a>  | Inclusion and exclusion criteria for participants. If applicable,         | Paper p10-11             |
| 9  |                            |                      | eligibility criteria for study centres and individuals who will perform   |                          |
| 10 |                            |                      | the interventions (eg, surgeons, psychotherapists)                        |                          |
| 11 |                            |                      |                                                                           |                          |
| 12 |                            |                      |                                                                           |                          |
| 13 |                            |                      |                                                                           |                          |
| 14 |                            |                      |                                                                           |                          |
| 15 |                            |                      |                                                                           |                          |
| 16 | Interventions: description | <a href="#">#11a</a> | Interventions for each group with sufficient detail to allow replication, | Paper p13-18             |
| 17 |                            |                      | including how and when they will be administered                          |                          |
| 18 |                            |                      |                                                                           |                          |
| 19 |                            |                      |                                                                           |                          |
| 20 |                            |                      |                                                                           |                          |
| 21 |                            |                      |                                                                           |                          |
| 22 | Interventions:             | <a href="#">#11b</a> | Criteria for discontinuing or modifying allocated interventions for a     | Paper p13                |
| 23 | modifications              |                      | given trial participant (eg, drug dose change in response to harms,       |                          |
| 24 |                            |                      | participant request, or improving / worsening disease)                    |                          |
| 25 |                            |                      |                                                                           |                          |
| 26 |                            |                      |                                                                           |                          |
| 27 |                            |                      |                                                                           |                          |
| 28 |                            |                      |                                                                           |                          |
| 29 | Interventions: adherence   | <a href="#">#11c</a> | Strategies to improve adherence to intervention protocols, and any        | Paper p19, Protocol v3.0 |
| 30 |                            |                      | procedures for monitoring adherence (eg, drug tablet return;              | p44                      |
| 31 |                            |                      | laboratory tests)                                                         |                          |
| 32 |                            |                      |                                                                           |                          |
| 33 |                            |                      |                                                                           |                          |
| 34 |                            |                      |                                                                           |                          |
| 35 |                            |                      |                                                                           |                          |
| 36 |                            |                      |                                                                           |                          |
| 37 | Interventions: concomitant | <a href="#">#11d</a> | Relevant concomitant care and interventions that are permitted or         | Paper p18                |
| 38 | care                       |                      | prohibited during the trial                                               |                          |
| 39 |                            |                      |                                                                           |                          |
| 40 |                            |                      |                                                                           |                          |
| 41 |                            |                      |                                                                           |                          |
| 42 |                            |                      |                                                                           |                          |
| 43 |                            |                      |                                                                           |                          |
| 44 |                            |                      |                                                                           |                          |
| 45 |                            |                      |                                                                           |                          |
| 46 |                            |                      |                                                                           |                          |
| 47 |                            |                      |                                                                           |                          |

|    |                      |                     |                                                                       |               |
|----|----------------------|---------------------|-----------------------------------------------------------------------|---------------|
| 1  | Outcomes             | <a href="#">#12</a> | Primary, secondary, and other outcomes, including the specific        | Paper p19-25  |
| 2  |                      |                     | measurement variable (eg, systolic blood pressure), analysis metric   |               |
| 3  |                      |                     | (eg, change from baseline, final value, time to event), method of     |               |
| 4  |                      |                     | aggregation (eg, median, proportion), and time point for each         |               |
| 5  |                      |                     | outcome. Explanation of the clinical relevance of chosen efficacy and |               |
| 6  |                      |                     | harm outcomes is strongly recommended                                 |               |
| 7  |                      |                     |                                                                       |               |
| 8  |                      |                     |                                                                       |               |
| 9  |                      |                     |                                                                       |               |
| 10 |                      |                     |                                                                       |               |
| 11 |                      |                     |                                                                       |               |
| 12 |                      |                     |                                                                       |               |
| 13 |                      |                     |                                                                       |               |
| 14 |                      |                     |                                                                       |               |
| 15 | Participant timeline | <a href="#">#13</a> | Time schedule of enrolment, interventions (including any run-ins and  | Paper figure1 |
| 16 |                      |                     | washouts), assessments, and visits for participants. A schematic      |               |
| 17 |                      |                     | diagram is highly recommended (see Figure)                            |               |
| 18 |                      |                     |                                                                       |               |
| 19 |                      |                     |                                                                       |               |
| 20 |                      |                     |                                                                       |               |
| 21 |                      |                     |                                                                       |               |
| 22 |                      |                     |                                                                       |               |
| 23 | Sample size          | <a href="#">#14</a> | Estimated number of participants needed to achieve study objectives   | Paper p26     |
| 24 |                      |                     | and how it was determined, including clinical and statistical         |               |
| 25 |                      |                     | assumptions supporting any sample size calculations                   |               |
| 26 |                      |                     |                                                                       |               |
| 27 |                      |                     |                                                                       |               |
| 28 |                      |                     |                                                                       |               |
| 29 |                      |                     |                                                                       |               |
| 30 |                      |                     |                                                                       |               |
| 31 | Recruitment          | <a href="#">#15</a> | Strategies for achieving adequate participant enrolment to reach      | Paper p11-12  |
| 32 |                      |                     | target sample size                                                    |               |
| 33 |                      |                     |                                                                       |               |
| 34 |                      |                     |                                                                       |               |
| 35 |                      |                     |                                                                       |               |

36 **Methods: Assignment of**  
37 **interventions (for**  
38 **controlled trials)**  
39  
40  
41  
42  
43  
44

|                                                                               |                                                 |                      |                                                                                                                                                                                                                                                                                                                                                          |                  |
|-------------------------------------------------------------------------------|-------------------------------------------------|----------------------|----------------------------------------------------------------------------------------------------------------------------------------------------------------------------------------------------------------------------------------------------------------------------------------------------------------------------------------------------------|------------------|
| 1<br>2<br>3<br>4<br>5<br>6<br>7<br>8<br>9<br>10<br>11<br>12<br>13<br>14<br>15 | Allocation: sequence<br><br>generation          | <a href="#">#16a</a> | Method of generating the allocation sequence (eg, computer-generated random numbers), and list of any factors for stratification. To reduce predictability of a random sequence, details of any planned restriction (eg, blocking) should be provided in a separate document that is unavailable to those who enrol participants or assign interventions | Paper p12        |
| 16<br>17<br>18<br>19<br>20<br>21<br>22<br>23<br>24                            | Allocation concealment<br><br>mechanism         | <a href="#">#16b</a> | Mechanism of implementing the allocation sequence (eg, central telephone; sequentially numbered, opaque, sealed envelopes), describing any steps to conceal the sequence until interventions are assigned                                                                                                                                                | Paper p12        |
| 26<br>27<br>28<br>29<br>30                                                    | Allocation: implementation                      | <a href="#">#16c</a> | Who will generate the allocation sequence, who will enrol participants, and who will assign participants to interventions                                                                                                                                                                                                                                | Paper p12        |
| 31<br>32<br>33<br>34<br>35<br>36<br>37                                        | Blinding (masking)                              | <a href="#">#17a</a> | Who will be blinded after assignment to interventions (eg, trial participants, care providers, outcome assessors, data analysts), and how                                                                                                                                                                                                                | Paper p12        |
| 39<br>40<br>41<br>42<br>43<br>44                                              | Blinding (masking):<br><br>emergency unblinding | <a href="#">#17b</a> | If blinded, circumstances under which unblinding is permissible, and procedure for revealing a participant’s allocated intervention during the trial                                                                                                                                                                                                     | N/A, no blinding |



1 **Methods: Data collection,**  
 2  
 3 **management, and analysis**  
 4

|                                                                                         |                                    |                      |                                                                                                                                                                                                                                                                                                                                                                                                              |                                         |
|-----------------------------------------------------------------------------------------|------------------------------------|----------------------|--------------------------------------------------------------------------------------------------------------------------------------------------------------------------------------------------------------------------------------------------------------------------------------------------------------------------------------------------------------------------------------------------------------|-----------------------------------------|
| 5<br>6<br>7<br>8<br>9<br>10<br>11<br>12<br>13<br>14<br>15<br>16<br>17<br>18<br>19<br>20 | Data collection plan               | <a href="#">#18a</a> | Plans for assessment and collection of outcome, baseline, and other trial data, including any related processes to promote data quality (eg, duplicate measurements, training of assessors) and a description of study instruments (eg, questionnaires, laboratory tests) along with their reliability and validity, if known. Reference to where data collection forms can be found, if not in the protocol | Data management plan v2.0               |
| 21<br>22<br>23<br>24<br>25<br>26<br>27<br>28                                            | Data collection plan:<br>retention | <a href="#">#18b</a> | Plans to promote participant retention and complete follow-up, including list of any outcome data to be collected for participants who discontinue or deviate from intervention protocols                                                                                                                                                                                                                    | Paper p29, Risk assessment plan v1 p8-9 |
| 29<br>30<br>31<br>32<br>33<br>34<br>35<br>36<br>37                                      | Data management                    | <a href="#">#19</a>  | Plans for data entry, coding, security, and storage, including any related processes to promote data quality (eg, double data entry; range checks for data values). Reference to where details of data management procedures can be found, if not in the protocol                                                                                                                                            | Data management plan v2.0               |
| 38<br>39<br>40<br>41<br>42<br>43<br>44                                                  | Statistics: outcomes               | <a href="#">#20a</a> | Statistical methods for analysing primary and secondary outcomes. Reference to where other details of the statistical analysis plan can be found, if not in the protocol                                                                                                                                                                                                                                     | Paper p27-28                            |

|    |                            |                      |                                                                      |                       |
|----|----------------------------|----------------------|----------------------------------------------------------------------|-----------------------|
| 1  | Statistics: additional     | <a href="#">#20b</a> | Methods for any additional analyses (eg, subgroup and adjusted       | Paper p27-28          |
| 2  |                            |                      |                                                                      |                       |
| 3  | analyses                   |                      | analyses)                                                            |                       |
| 4  |                            |                      |                                                                      |                       |
| 5  |                            |                      |                                                                      |                       |
| 6  | Statistics: analysis       | <a href="#">#20c</a> | Definition of analysis population relating to protocol non-adherence | Paper p27             |
| 7  |                            |                      |                                                                      |                       |
| 8  | population and missing     |                      | (eg, as randomised analysis), and any statistical methods to handle  |                       |
| 9  |                            |                      |                                                                      |                       |
| 10 | data                       |                      | missing data (eg, multiple imputation)                               |                       |
| 11 |                            |                      |                                                                      |                       |
| 12 |                            |                      |                                                                      |                       |
| 13 |                            |                      |                                                                      |                       |
| 14 | <b>Methods: Monitoring</b> |                      |                                                                      |                       |
| 15 |                            |                      |                                                                      |                       |
| 16 |                            |                      |                                                                      |                       |
| 17 | Data monitoring: formal    | <a href="#">#21a</a> | Composition of data monitoring committee (DMC); summary of its       | Paper p29             |
| 18 |                            |                      |                                                                      |                       |
| 19 | committee                  |                      | role and reporting structure; statement of whether it is independent |                       |
| 20 |                            |                      |                                                                      |                       |
| 21 |                            |                      |                                                                      |                       |
| 22 |                            |                      |                                                                      |                       |
| 23 |                            |                      |                                                                      |                       |
| 24 |                            |                      |                                                                      |                       |
| 25 |                            |                      |                                                                      |                       |
| 26 |                            |                      |                                                                      |                       |
| 27 |                            |                      |                                                                      |                       |
| 28 |                            |                      |                                                                      |                       |
| 29 | Data monitoring: interim   | <a href="#">#21b</a> | Description of any interim analyses and stopping guidelines,         | Paper p26             |
| 30 |                            |                      |                                                                      |                       |
| 31 | analysis                   |                      | including who will have access to these interim results and make the |                       |
| 32 |                            |                      |                                                                      |                       |
| 33 |                            |                      |                                                                      |                       |
| 34 |                            |                      |                                                                      |                       |
| 35 |                            |                      |                                                                      |                       |
| 36 |                            |                      |                                                                      |                       |
| 37 | Harms                      | <a href="#">#22</a>  | Plans for collecting, assessing, reporting, and managing solicited   | Protocol v3.0 p46-47; |
| 38 |                            |                      |                                                                      |                       |
| 39 |                            |                      |                                                                      |                       |
| 40 |                            |                      |                                                                      |                       |
| 41 |                            |                      |                                                                      |                       |
| 42 |                            |                      |                                                                      |                       |
| 43 |                            |                      |                                                                      |                       |
| 44 |                            |                      |                                                                      |                       |
| 45 |                            |                      |                                                                      |                       |
| 46 |                            |                      |                                                                      |                       |
| 47 |                            |                      |                                                                      |                       |

|    |                                 |                      |                                                                                                                                                                                                                                    |                                      |
|----|---------------------------------|----------------------|------------------------------------------------------------------------------------------------------------------------------------------------------------------------------------------------------------------------------------|--------------------------------------|
| 1  | Auditing                        | <a href="#">#23</a>  | Frequency and procedures for auditing trial conduct, if any, and whether the process will be independent from investigators and the sponsor                                                                                        | Paper p29                            |
| 2  |                                 |                      |                                                                                                                                                                                                                                    |                                      |
| 3  |                                 |                      |                                                                                                                                                                                                                                    |                                      |
| 4  |                                 |                      |                                                                                                                                                                                                                                    |                                      |
| 5  |                                 |                      |                                                                                                                                                                                                                                    |                                      |
| 6  |                                 |                      |                                                                                                                                                                                                                                    |                                      |
| 7  |                                 |                      |                                                                                                                                                                                                                                    |                                      |
| 8  |                                 |                      |                                                                                                                                                                                                                                    |                                      |
| 9  | <b>Ethics and dissemination</b> |                      |                                                                                                                                                                                                                                    |                                      |
| 10 |                                 |                      |                                                                                                                                                                                                                                    |                                      |
| 11 |                                 |                      |                                                                                                                                                                                                                                    |                                      |
| 12 | Research ethics approval        | <a href="#">#24</a>  | Plans for seeking research ethics committee / institutional review board (REC / IRB) approval                                                                                                                                      | Protocol v3.0 p57                    |
| 13 |                                 |                      |                                                                                                                                                                                                                                    |                                      |
| 14 |                                 |                      |                                                                                                                                                                                                                                    |                                      |
| 15 |                                 |                      |                                                                                                                                                                                                                                    |                                      |
| 16 |                                 |                      |                                                                                                                                                                                                                                    |                                      |
| 17 | Protocol amendments             | <a href="#">#25</a>  | Plans for communicating important protocol modifications (eg, changes to eligibility criteria, outcomes, analyses) to relevant parties (eg, investigators, REC / IRBs, trial participants, trial registries, journals, regulators) | Protocol v3.0 p57                    |
| 18 |                                 |                      |                                                                                                                                                                                                                                    |                                      |
| 19 |                                 |                      |                                                                                                                                                                                                                                    |                                      |
| 20 |                                 |                      |                                                                                                                                                                                                                                    |                                      |
| 21 |                                 |                      |                                                                                                                                                                                                                                    |                                      |
| 22 |                                 |                      |                                                                                                                                                                                                                                    |                                      |
| 23 |                                 |                      |                                                                                                                                                                                                                                    |                                      |
| 24 |                                 |                      |                                                                                                                                                                                                                                    |                                      |
| 25 |                                 |                      |                                                                                                                                                                                                                                    |                                      |
| 26 |                                 |                      |                                                                                                                                                                                                                                    |                                      |
| 27 | Consent or assent               | <a href="#">#26a</a> | Who will obtain informed consent or assent from potential trial participants or authorised surrogates, and how (see Item 32)                                                                                                       | Paper p11-12, Protocol v3.0 p33      |
| 28 |                                 |                      |                                                                                                                                                                                                                                    |                                      |
| 29 |                                 |                      |                                                                                                                                                                                                                                    |                                      |
| 30 |                                 |                      |                                                                                                                                                                                                                                    |                                      |
| 31 |                                 |                      |                                                                                                                                                                                                                                    |                                      |
| 32 | Consent or assent:              | <a href="#">#26b</a> | Additional consent provisions for collection and use of participant data and biological specimens in ancillary studies, if applicable                                                                                              | N/A                                  |
| 33 | ancillary studies               |                      |                                                                                                                                                                                                                                    |                                      |
| 34 |                                 |                      |                                                                                                                                                                                                                                    |                                      |
| 35 |                                 |                      |                                                                                                                                                                                                                                    |                                      |
| 36 |                                 |                      |                                                                                                                                                                                                                                    |                                      |
| 37 |                                 |                      |                                                                                                                                                                                                                                    |                                      |
| 38 | Confidentiality                 | <a href="#">#27</a>  | How personal information about potential and enrolled participants will be collected, shared, and maintained in order to protect confidentiality before, during, and after the trial                                               | Paper p29, Data Management Plan p6-7 |
| 39 |                                 |                      |                                                                                                                                                                                                                                    |                                      |
| 40 |                                 |                      |                                                                                                                                                                                                                                    |                                      |
| 41 |                                 |                      |                                                                                                                                                                                                                                    |                                      |
| 42 |                                 |                      |                                                                                                                                                                                                                                    |                                      |
| 43 |                                 |                      |                                                                                                                                                                                                                                    |                                      |
| 44 |                                 |                      |                                                                                                                                                                                                                                    |                                      |
| 45 |                                 |                      |                                                                                                                                                                                                                                    |                                      |
| 46 |                                 |                      |                                                                                                                                                                                                                                    |                                      |
| 47 |                                 |                      |                                                                                                                                                                                                                                    |                                      |

|    |                               |                      |                                                                         |                          |
|----|-------------------------------|----------------------|-------------------------------------------------------------------------|--------------------------|
| 1  | Declaration of interests      | <a href="#">#28</a>  | Financial and other competing interests for principal investigators for | Paper p30                |
| 2  |                               |                      |                                                                         |                          |
| 3  |                               |                      | the overall trial and each study site                                   |                          |
| 4  |                               |                      |                                                                         |                          |
| 5  |                               |                      |                                                                         |                          |
| 6  | Data access                   | <a href="#">#29</a>  | Statement of who will have access to the final trial dataset, and       | Data Management Plan     |
| 7  |                               |                      |                                                                         |                          |
| 8  |                               |                      | disclosure of contractual agreements that limit such access for         | p3-4                     |
| 9  |                               |                      |                                                                         |                          |
| 10 |                               |                      | investigators                                                           |                          |
| 11 |                               |                      |                                                                         |                          |
| 12 |                               |                      |                                                                         |                          |
| 13 |                               |                      |                                                                         |                          |
| 14 | Ancillary and post trial care | <a href="#">#30</a>  | Provisions, if any, for ancillary and post-trial care, and for          | Not specified            |
| 15 |                               |                      |                                                                         |                          |
| 16 |                               |                      | compensation to those who suffer harm from trial participation          |                          |
| 17 |                               |                      |                                                                         |                          |
| 18 |                               |                      |                                                                         |                          |
| 19 | Dissemination policy: trial   | <a href="#">#31a</a> | Plans for investigators and sponsor to communicate trial results to     | Paper p30, Protocol v3.0 |
| 20 |                               |                      |                                                                         |                          |
| 21 | results                       |                      | participants, healthcare professionals, the public, and other relevant  | p61                      |
| 22 |                               |                      |                                                                         |                          |
| 23 |                               |                      | groups (eg, via publication, reporting in results databases, or other   |                          |
| 24 |                               |                      |                                                                         |                          |
| 25 |                               |                      | data sharing arrangements), including any publication restrictions      |                          |
| 26 |                               |                      |                                                                         |                          |
| 27 |                               |                      |                                                                         |                          |
| 28 |                               |                      |                                                                         |                          |
| 29 | Dissemination policy:         | <a href="#">#31b</a> | Authorship eligibility guidelines and any intended use of professional  | Protocol v3.0 p61, study |
| 30 |                               |                      |                                                                         |                          |
| 31 | authorship                    |                      | writers                                                                 | agreement sponsor-study  |
| 32 |                               |                      |                                                                         |                          |
| 33 |                               |                      |                                                                         | site                     |
| 34 |                               |                      |                                                                         |                          |
| 35 |                               |                      |                                                                         |                          |
| 36 |                               |                      |                                                                         |                          |
| 37 | Dissemination policy:         | <a href="#">#31c</a> | Plans, if any, for granting public access to the full protocol,         | Protocol v3.0 p61        |
| 38 |                               |                      |                                                                         |                          |
| 39 | reproducible research         |                      | participant-level dataset, and statistical code                         |                          |
| 40 |                               |                      |                                                                         |                          |
| 41 |                               |                      |                                                                         |                          |
| 42 |                               |                      |                                                                         |                          |
| 43 | <b>Appendices</b>             |                      |                                                                         |                          |
| 44 |                               |                      |                                                                         |                          |
| 45 |                               |                      |                                                                         |                          |
| 46 |                               |                      |                                                                         |                          |
| 47 |                               |                      |                                                                         |                          |

|                                            |                            |                     |                                                                                                                                                                                                |                                                               |
|--------------------------------------------|----------------------------|---------------------|------------------------------------------------------------------------------------------------------------------------------------------------------------------------------------------------|---------------------------------------------------------------|
| 1<br>2<br>3<br>4<br>5<br>6<br>7            | Informed consent materials | <a href="#">#32</a> | Model consent form and other related documentation given to participants and authorised surrogates                                                                                             | In TMF Informed Consent Form v6.0 in Dutch and v5.0 in French |
| 8<br>9<br>10<br>11<br>12<br>13<br>14<br>15 | Biological specimens       | <a href="#">#33</a> | Plans for collection, laboratory evaluation, and storage of biological specimens for genetic or molecular analysis in the current trial and for future use in ancillary studies, if applicable | N/A                                                           |

16  
17  
18  
19  
20  
21  
22  
23  
24  
25  
26  
27  
28  
29  
30  
31  
32  
33  
34  
35  
36  
37  
38  
39  
40  
41  
42  
43  
44  
45  
46  
47

None The SPIRIT Explanation and Elaboration paper is distributed under the terms of the Creative Commons Attribution License CC-BY-NC. This checklist can be completed online using <https://www.goodreports.org/>, a tool made by the [EQUATOR Network](#) in collaboration with [Penelope.ai](#)
